# 1 *Naa12* compensates for *Naa10* in mice in the amino-terminal acetylation 2 pathway

3 Hyae Yon Kweon<sup>1¶</sup>, Mi-Ni Lee<sup>1,¶a¶\*</sup>, Max Dörfel<sup>2</sup>, Seungwoon Seo<sup>1</sup>, Leah Gottlieb<sup>3,4</sup>, Thomas Papazyan<sup>2</sup>, Nina  
4 McTiernan<sup>5</sup>, Rasmus Ree<sup>5</sup>, David Bolton<sup>6</sup>, Andrew Garcia<sup>7</sup>, Michael Flory<sup>8</sup>, Jonathan Crain<sup>2</sup>, Alison Sebold<sup>2</sup>,  
5 Scott Lyons<sup>2</sup>, Ahmed Ismail<sup>2</sup>, Elaine Marchi<sup>7</sup>, Seong-keun Sonn<sup>1</sup>, Se-Jin Jeong<sup>9</sup>, Sejin Jeon<sup>1</sup>, Shinyeong Ju<sup>10</sup>,  
6 Simon J. Conway<sup>11</sup>, TaeSoo Kim<sup>1</sup>, Hyun-Seok Kim<sup>1</sup>, Cheolju Lee<sup>10,12</sup>, Tae-Young Roh<sup>13</sup>, Thomas Arnesen<sup>5,14,15</sup>,  
7 Ronen Marmorstein<sup>3,4,16</sup>, Goo Taeg Oh<sup>1\*</sup>, Gholson J. Lyon<sup>2,7,17,18\*</sup>

8 <sup>1</sup>Department of Life Science and College of Natural Sciences, Ewha Womans University, Seoul, Republic of  
9 Korea

10 <sup>2</sup>Stanley Institute for Cognitive Genomics, Cold Spring Harbor Laboratory, Woodbury, New York, United States  
11 of America

12 <sup>3</sup>Department of Chemistry, University of Pennsylvania, Philadelphia, United States of America

13 <sup>4</sup>Abramson Family Cancer Research Institute, Perelman School of Medicine, University of Pennsylvania,  
14 Philadelphia, United States of America

15 <sup>5</sup>Department of Biomedicine, University of Bergen, Bergen, Norway

16 <sup>6</sup>Department of Molecular Biology, New York State Institute for Basic Research in Developmental Disabilities,  
17 Staten Island, New York, United States of America

18 <sup>7</sup>Department of Human Genetics, New York State Institute for Basic Research in Developmental Disabilities,  
19 Staten Island, New York, United States of America

20 <sup>8</sup>Research Design and Analysis Service, New York State Institute for Basic Research in Developmental  
21 Disabilities, Staten Island, New York, United States of America

22 <sup>9</sup>Center for Cardiovascular Research, Washington University School of Medicine, Saint Louis, Missouri, United  
23 States of America

24 <sup>10</sup>Center for Theragnosis, Korea Institute of Science and Technology, Seoul, Republic of Korea

25 <sup>11</sup>Herman B. Wells Center for Pediatric Research, Indiana University School of Medicine, Indianapolis, United  
26 States of America

27 <sup>12</sup>Department of Converging Science and Technology, KHU-KIST, Kyung Hee University, Seoul, Republic of  
28 Korea

29 <sup>13</sup>Department of Life Sciences, Pohang University of Science and Technology, Pohang, Republic of Korea

30 <sup>14</sup>Department of Biological Sciences, University of Bergen, Bergen, Norway

31 <sup>15</sup>Department of Surgery, Haukeland University Hospital, Bergen, Norway

32 <sup>16</sup>Department of Biochemistry and Biophysics, Perelman School of Medicine, University of Pennsylvania,  
33 Philadelphia, United States of America

34 <sup>17</sup>George A. Jervis Clinic, New York State Institute for Basic Research in Developmental Disabilities, Staten  
35 Island, New York, United States of America

36 <sup>18</sup>Biology PhD Program, The Graduate Center, The City University of New York, New York, United States of  
37 America

38 <sup>#a</sup>Current Address: Laboratory Animal Resource Center, Korea Research Institute of Bioscience and  
39 Biotechnology, Chungbuk, Republic of Korea

40 \* Corresponding author

41 E-mail: minilee@kribb.re.kr / tinymini@ewhain.net (MNL)

42 gholsonjlyon@gmail.com / gholson.j.lyon@opwdd.ny.gov (GJL)

43 gootaeg@ewha.ac.kr (GTO)

44

45 ¶ These authors contributed equally to this work.

46

## 47 **Abstract**

48 Amino-terminal acetylation is catalyzed by a set of N-terminal acetyltransferases  
49 (NATs). The NatA complex (including X-linked *Naa10* and *Naa15*) is the major  
50 acetyltransferase, with 40-50% of all mammalian proteins being potential substrates.  
51 However, the overall role of amino-terminal acetylation on a whole-organism level is poorly  
52 understood, particularly in mammals. Male mice lacking *Naa10* show no globally apparent *in*  
53 *vivo* amino-terminal acetylation impairment and do not exhibit complete embryonic lethality.  
54 Rather *Naa10* nulls display increased neonatal lethality, and the majority of surviving  
55 undersized mutants exhibit a combination of hydrocephaly, cardiac defects, homeotic anterior  
56 transformation, piebaldism and urogenital anomalies. *Naa12* is a previously unannotated  
57 *Naa10*-like paralogue with NAT activity that genetically compensates for *Naa10*. Mice  
58 deficient for *Naa12* have no apparent phenotype, whereas mice deficient for *Naa10* and  
59 *Naa12* display embryonic lethality. The discovery of *Naa12* adds to the currently known  
60 machinery involved in amino-terminal acetylation in mice.

## 61 **Introduction**

62 Amino-terminal acetylation is one of the most common protein modifications,  
63 occurring co- and post-translationally. Approximately 80% of cytosolic proteins are amino-  
64 terminally acetylated in humans and ~50% in yeast [1], while amino-terminal acetylation is  
65 less common in prokaryotes and archaea [2]. Amino-terminal acetylation is catalyzed by a  
66 set of enzymes, the N-terminal acetyltransferases (NATs), which transfer an acetyl group  
67 from acetyl-coenzyme A (Ac-CoA) to the free  $\alpha$ -amino group of a protein's N-terminus. To  
68 date, eight distinct NATs (NatA – NatH) have been identified in eukaryotes that are classified  
69 based on different subunit compositions and substrate specificities [3-5]. Amino-terminal  
70 acetylation has been implicated in steering protein folding, stability or degradation,  
71 subcellular targeting, and complex formation [6-10]. The vital role of NATs and amino-  
72 terminal acetylation in development has also emerged [11].

73 NatA, the major NAT complex, targets ~40% of the human proteome, acetylating  
74 Ser-, Ala-, Gly-, Thr-, Val- and Cys N-termini after removal of the initiator methionine [1, 5].  
75 Human NatA consists of two main subunits, the catalytic subunit N- $\alpha$ -acetyltransferase 10  
76 (NAA10) (Ard1) and the auxiliary subunit NAA15 (Nat1), and a regulatory subunit HYPK  
77 [12-14]. NAA15 function has been linked to cell survival, tumor progression, and retinal  
78 development [15, 16]. In addition, *Naa10*-catalyzed N-terminal acetylation has been reported  
79 to be essential for development in many species [11, 17-22], and although NatA is not  
80 essential in *S. cerevisiae*, depletion of *Naa10* or *Naa15* has strong effects, including slow  
81 growth and decreased survival when exposed to various stresses [23, 24].

82 *NAA10* mutations were found to be associated with several human diseases  
83 characterized by severe phenotypes, including global developmental defects [11]. Among  
84 these, the X-linked Ogden syndrome (OS) [25, 26] shows the most severe pathological  
85 features such as infant lethality and has reduced NatA catalytic activity. In a *Saccharomyces*  
86 *cerevisiae* model for the *Naa10* Ser37Pro mutant, the mutation impairs NatA complex

87 formation and leads to a reduction in NatA catalytic activity and functionality [27, 28].  
88 Further, OS patient-derived cells have impaired amino-terminal acetylation *in vivo* of some  
89 NatA substrates [25]. Over the years, many additional pathogenic *NAA10* variants have been  
90 identified in *NAA10* or NAA15 [29-37] and the collection of presenting symptoms for  
91 families with *NAA10* mutations is currently referred to as Ogden syndrome or *NAA10*-related  
92 syndrome [38].

93 The autosomal *NAA10* homolog, *NAA11* (ARD2), has been reported to be present in  
94 mice and humans, and is co-expressed with *NAA10* in human cell lines [39]. Therefore,  
95 *NAA11* could conceivably compensate when *NAA10* is reduced or lacking [11]. However,  
96 *NAA11* was only found in testis and placenta in human and gonadal tissues in mouse, while  
97 *NAA10* showed widespread expression in various tissues in embryos and adults [40]. Thus,  
98 any functional redundancy or compensation might be limited to certain tissues only.

99 To elucidate the functional role of *Naa10* during development in mice, we used two  
100 different *Naa10*-deficient mouse lines: one, referred to as *Naa10* knockout (KO), which was  
101 previously reported specifically related to bone density in postnatal day 3 (P3) mice [41], and  
102 another denoted as *Naa10<sup>tm1a</sup>(EUCOMM)Hmgu* (*Naa10<sup>tm1a</sup>*), generated in this study. These *Naa10*-  
103 deficient mice exhibit pleiotropic developmental abnormalities at a range of different ages,  
104 overlapping with some of the phenotypes seen in human disease involving NAA10  
105 impairment. Because we did not discover major changes in the overall Nt-acetylome in  
106 *Naa10* KO mice, we hypothesized that there might be a compensating gene in mice, which  
107 led us to the identification of a new paralog of *Naa10*, which we name *Naa12*. *Naa12* is  
108 expressed in several organs (liver, kidney, heart and testis) and, like *Naa10*, binds to *Naa15* to  
109 mediate NatA activity. Furthermore, lethality was observed in *Naa10 Naa12* double-KO  
110 mice, which supports the compensatory role of *Naa12 in vivo*. Thus, we demonstrate that  
111 *Naa10* is essential for proper development and *Naa12*, a newly-identified paralog of *Naa10*,  
112 can play a compensatory role in mice.

## 113 **Results**

### 114 ***Naa10* knockout mice can be born, but display pleiotropic developmental defects**

115 To explore the role of *Naa10* in development, most analyses were carried out using  
116 our *Naa10* KO model mice that had been generated previously [41] using a targeting vector  
117 deleting Exon1, including the start codon, and Exon2 to Exon4 containing the GNAT domain  
118 including the Acetyl-CoA binding motif, which is crucial for *Naa10* function. We also  
119 generated another *Naa10*-deficient mouse which we called *Naa10<sup>tm1a</sup>*, expressing  $\beta$ -  
120 galactosidase rather than the *Naa10* gene (**Supplement Fig. 1A**). *Naa10* expression was  
121 deficient in *Naa10<sup>tm1a</sup>* mice (**Supplement Fig. 1B** and **Supplement Fig. 1C**). Especially  
122 strong  $\beta$ -gal staining was observed during embryonic stages in the brain, heart and spinal  
123 cord (**Supplement Fig. 1D**). Male *Naa10* KO (*Naa10<sup>-Y</sup>*) embryos displayed mild to severe  
124 developmental defects compared to wild-type (WT) (*Naa10<sup>+Y</sup>*) embryos. Some *Naa10<sup>-Y</sup>*  
125 mice had lower levels of somites and developmental delay. Additionally, some *Naa10<sup>-Y</sup>*  
126 embryos had a normal number of somites but were retarded in growth (**Fig. 1A**). Some of the

127 embryos underwent lysis or remained arrested at an earlier stage than embryonic day 10.5  
128 (E10.5), with no turning, an abnormal trunk, and underdeveloped facial features. These  
129 phenotypes also reproduced in *Naa10<sup>tm1a/Y</sup>* embryos. Next, we assessed whether *Naa10* is  
130 essential for viability and counted the Mendelian ratios. Both *Naa10<sup>-Y</sup>* and *Naa10<sup>tm1a/Y</sup>* mice  
131 were under-represented after birth, while there was no significant reduction in the embryonic  
132 stage in both mouse lines (**Supplement Table 1** and **Supplement Table 2**). We monitored the  
133 pups daily at postnatal day 0 (P0) to postnatal day 3 (P3) and beyond, and the survival rate of  
134 *Naa10<sup>-Y</sup>* mice dramatically decreased relative to either WT (*Naa10<sup>+Y</sup>* and *Naa10<sup>+/+</sup>*) or  
135 heterozygous female (*Naa10<sup>+/-</sup>*) mice after the first few days of life (**Fig. 1B**), and a few  
136 *Naa10<sup>-Y</sup>* mice with postnatal lethality exhibited severe developmental defects such as  
137 craniofacial anomaly, an undeveloped lower body, whole-body edema, and ocular  
138 malformations (**Fig. 1C**).

139 Congenital heart defects are one of the main causes of infant lethality, and cardiac  
140 diseases are a common developmental anomaly in OS patients [31], with some OS males  
141 dying in infancy with cardiac arrhythmias [26]. Therefore, we investigated whether *Naa10*  
142 KO affects cardiac development. Development of a four-chambered septated heart is  
143 normally complete at E14.5, therefore we examined the cardiovascular system at E14.5. We  
144 identified ventricular septal defects (VSD) in several *Naa10<sup>-Y</sup>* embryos, as well as  
145 concomitant double outlet right ventricle (DORV) at E14.5 (Fig 1D, upper). Ventricular septal  
146 defects (VSD) and atrial septal defects (ASD) were also observed at E18.5 (**Fig. 1D**, bottom),  
147 and persistent truncus arteriosus (PTA) or DORV, along with concomitant membranous and  
148 muscular VSDs, were found in several of the mice that died in the first day of life (n= 6/28  
149 examined). Given the presence of outflow tract defects and VSDs, we examined whether the  
150 ductus arteriosus had closed appropriately or not at birth. Significantly, both *Naa10<sup>-Y</sup>* and  
151 *Naa10<sup>-/-</sup>* females (n=3/28 examined) exhibited a patent ductus arteriosus, meaning there is a  
152 failure of the mutant *in utero* cardiovascular system to adapt to adult life (birth) and close the  
153 interatrial and aorta-pulmonary trunk shunts that are required for normal fetal life [42]. As  
154 murine outflow tract and VSD defects are not compatible with postnatal survival [42], these  
155 data suggest that congenital heart defects in *Naa10<sup>-Y</sup>* mice may explain some of their  
156 neonatal lethality (**Supplement Fig. 2**). We also examined surviving adult mice for any  
157 possible situs inversus, but we did not observe this in any adult (>4 weeks) *Naa10<sup>-Y</sup>* mice  
158 examined (n=19). Combined, these data suggest that *Naa10* mutant CHDs are mainly  
159 confined to aberrant remodeling of the great vessels of the heart, leading to pulmonary  
160 overload at birth resulting in lethality.

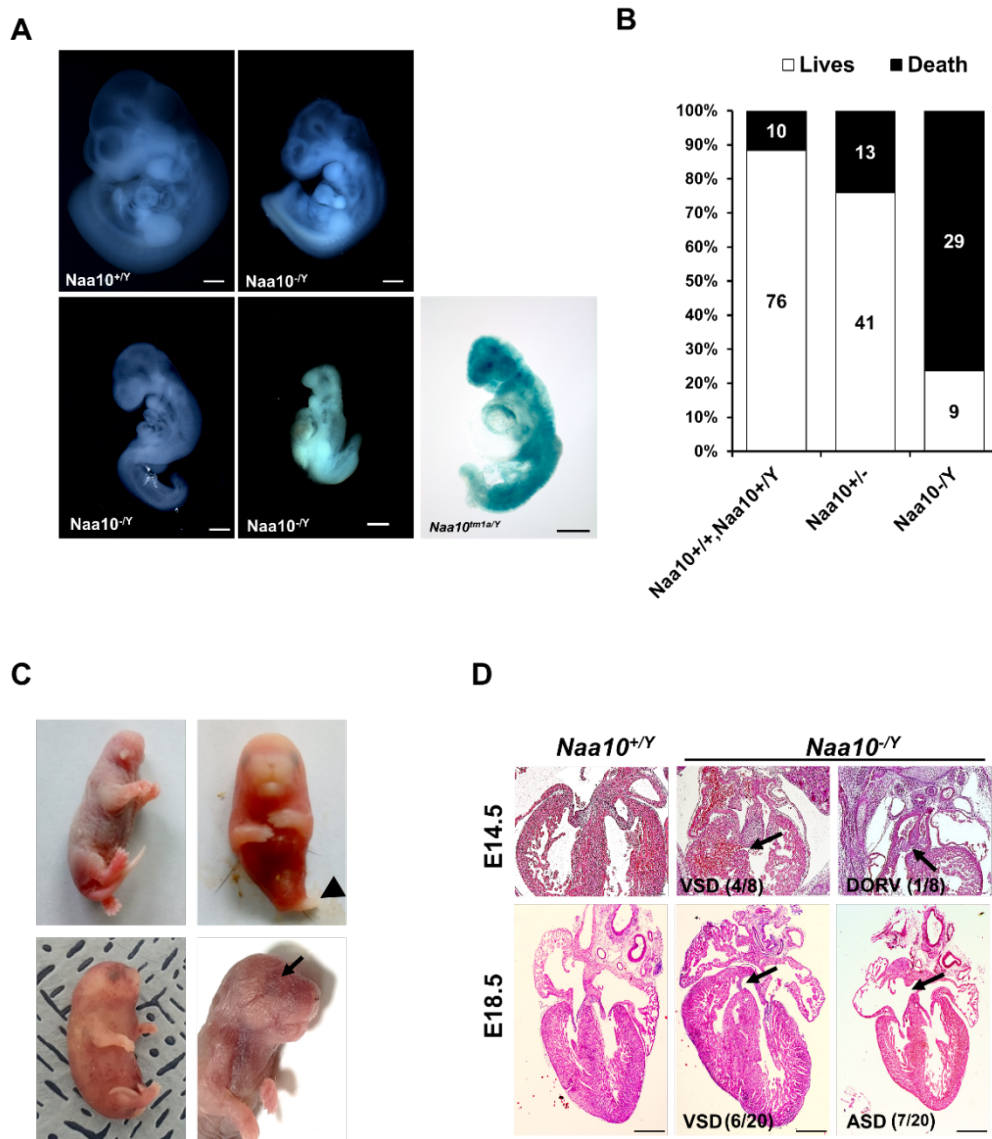

**Fig. 1. Deficiency of *Naa10* leads to abnormal development and postnatal lethality.** (A) *Naa10<sup>+Y</sup>*, *Naa10<sup>-Y</sup>* and *Naa10<sup>tm1a/Y</sup>* embryos at E10.5. Growth retardation (5/33, more than 5 somites lower or undersized compared to littermate controls), kinky trunk and developmental arrest are shown in *Naa10<sup>-Y</sup>* (4/33) and *Naa10<sup>tm1a/Y</sup>* (1/5). Scale bars: 500 $\mu$ m. (B) The percentage lethality in newborns, comparing *Naa10* wild-type (*Naa10<sup>+Y</sup>* and *Naa10<sup>+/+</sup>*), *Naa10<sup>+/-</sup>* and *Naa10<sup>-Y</sup>* pups until P3, derived from matings between heterozygous females and wild-type (WT) males. Approximately 11.6% (10/86) of WT, 24% (13/54) of *Naa10<sup>+/-</sup>* and 76.3% (29/38) *Naa10<sup>-Y</sup>* mice were found dead before P3. (C) Representative images of *Naa10<sup>-Y</sup>* pups during early postnatal days compared with *Naa10<sup>+Y</sup>*. Severe developmental defects such as malformations of head and lower body (one leg; black arrowheads), whole-body edema and anophthalmia (black arrows) are shown (N=1 each). (D) Hematoxylin and Eosin (H&E)-stained heart transverse section at E14.5 and vertical section at E18.5, comparing *Naa10<sup>+Y</sup>* and *Naa10<sup>-Y</sup>* embryos. *Naa10<sup>-Y</sup>* embryo shows a VSD at E14.5 and E18.5. Also, at E18.5, *Naa10<sup>-Y</sup>* embryo shows ASD. Arrow indicates VSD, ASD and DORV. Scale bars: 20  $\mu$ m. VSD, ventricular septal defect; ASD, atrial septal defect; DORV, double outlet right ventricle.

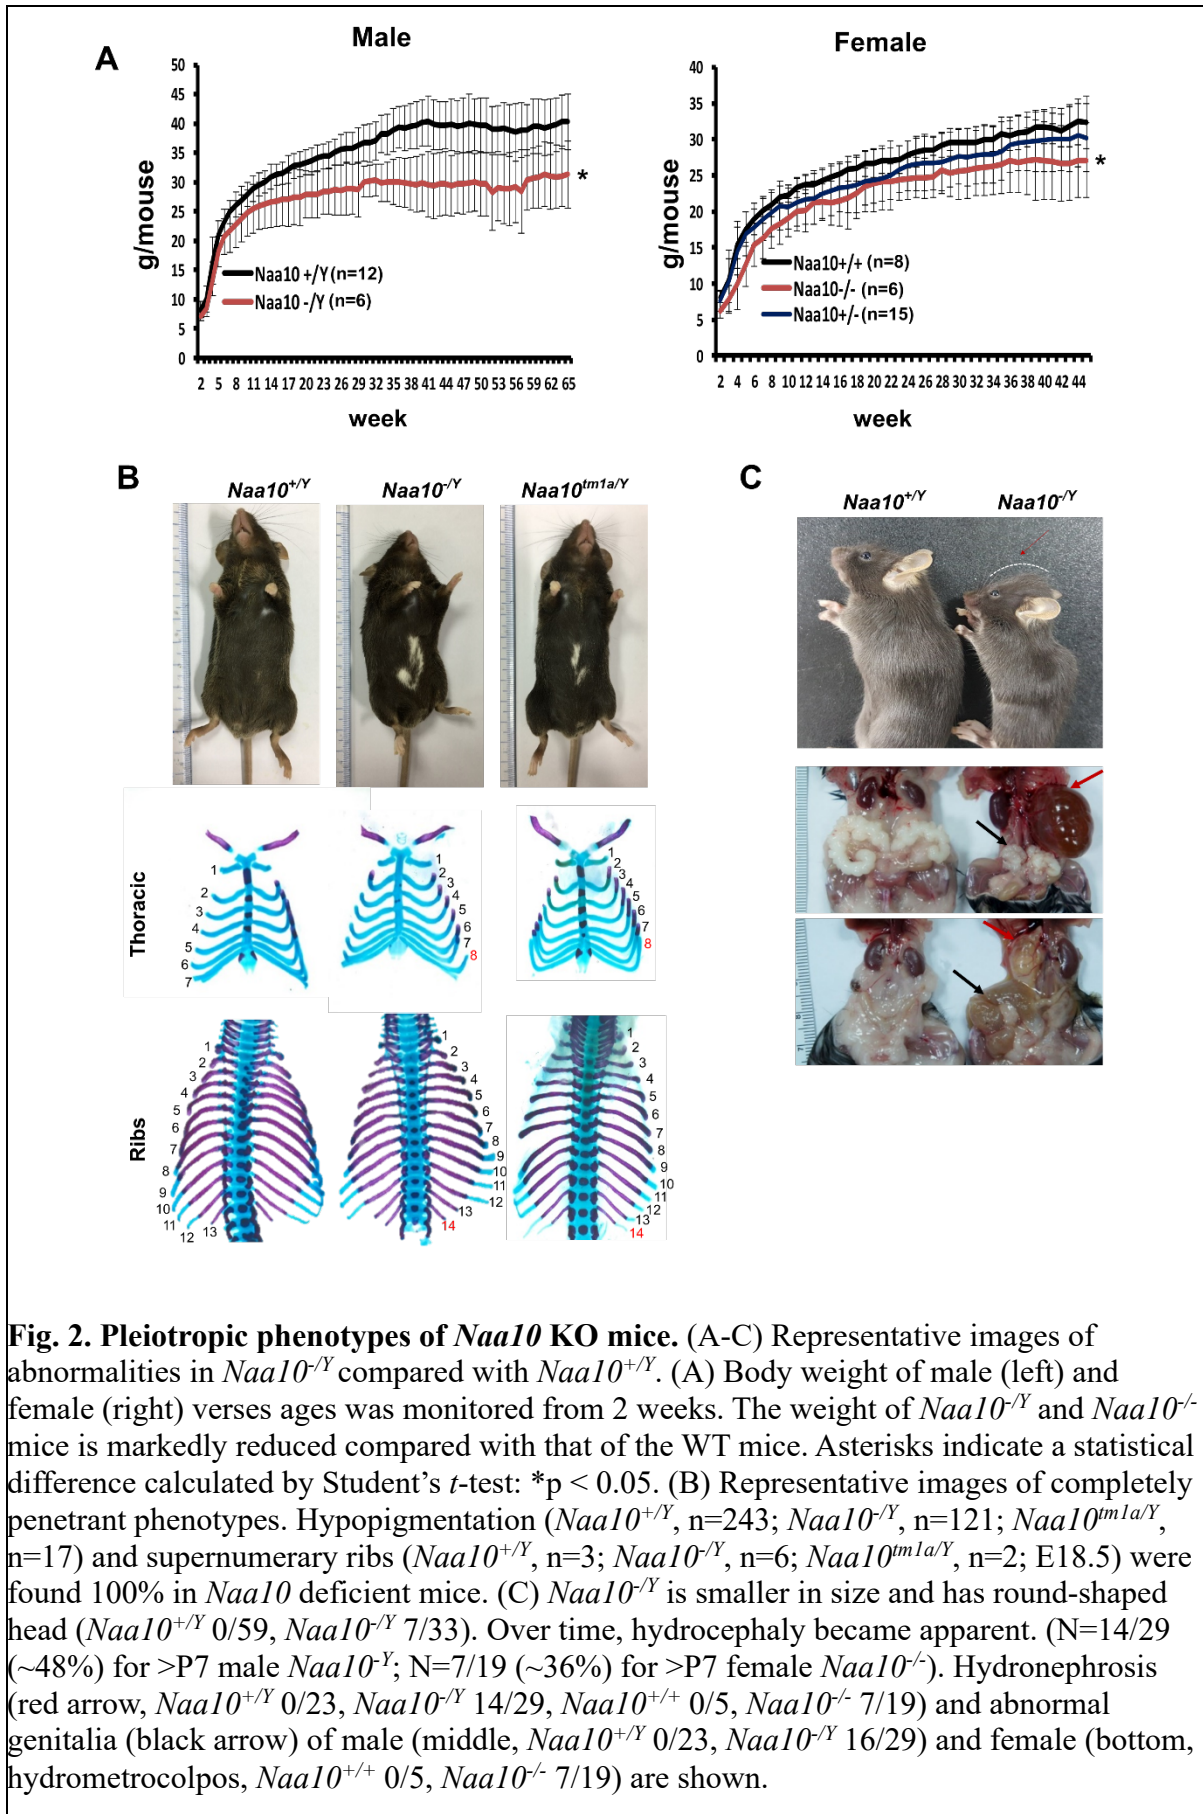

161 Some of the surviving homozygous mice (*Naa10<sup>-Y</sup>* and *Naa10<sup>-/-</sup>*) had reduced body  
 162 weight (**Fig. 2A**). This reduced body weight continued through weaning, and some mice lost  
 163 more weight as they developed progressive hydrocephaly. We observed that the smallest  
 164 weight animal between the *Naa10<sup>+Y</sup>* and one *Naa10<sup>-Y</sup>* genotypes was almost always the  
 165 *Naa10<sup>-Y</sup>* genotype when the analysis was restricted to only include litters in which there was  
 166 at least one of each of those genotypes living beyond four days of life. For example, 13 litters  
 167 met this criteria from the mating (*Naa10<sup>+/-</sup>* x *Naa10<sup>+Y</sup>*), and 12/13 of the litters had the  
 168 *Naa10<sup>-Y</sup>* as the lower weight (Fisher's exact test, two-tailed, P value <0.0001). 5 litters met  
 169 this criteria from the mating (*Naa10<sup>+/-</sup>* x *Naa10<sup>-Y</sup>*), and of these, all of them had the *Naa10<sup>-Y</sup>*  
 170 as the lower weight (Fisher's exact test, two-tailed, P value = 0.0079). Therefore, despite the  
 171 known variability in weight data as a function of genetic background, environment, and  
 172 stochastic variation [43], it does appear at least for "within-litter" analysis that *Naa10<sup>-Y</sup>* males  
 173 are born at a smaller weight than *Naa10<sup>+Y</sup>* males and on average remained the smallest male  
 174 in the litter throughout their life.

175 Although piebaldism has never been reported in humans with OS, all (100%) of  
 176 *Naa10<sup>-Y</sup>* and *Naa10<sup>tm1a/Y</sup>* mice exhibited hypopigmentation on their belly (**Fig. 2B**, upper),  
 177 with this piebaldism quite varied in its extent but not appearing to correlate in any way with  
 178 other phenotypes, such as hydrocephaly. Another phenotype with complete penetrance was  
 179 bilateral supernumerary ribs (14 pairs of rib instead of 13) in all *Naa10<sup>-Y</sup>* and *Naa10<sup>tm1a/Y</sup>*  
 180 mice (**Fig. 2B**, middle and bottom, **Table 1**). This extra pair of ribs linking to the sternum  
 181 transforms the T8 vertebrae into an anterior T7-like phenotype (**Supplement Fig. 3A-**  
 182 **Supplement Fig. 3D Fig, Table 1**).

183 **Table 1. Skeletal analyses for ribs, sternbrae, and vertebrae**

|                                                   | <i>Naa10<sup>+Y</sup></i><br>(n=50) | <i>Naa10<sup>+/+</sup></i><br>(n=10) | <i>Naa10<sup>+/-</sup></i><br>(n=17) | <i>Naa10<sup>-Y</sup></i><br>(n=17) | <i>Naa10<sup>-/-</sup></i><br>(n=1) |
|---------------------------------------------------|-------------------------------------|--------------------------------------|--------------------------------------|-------------------------------------|-------------------------------------|
| <b>4 sternbrae</b>                                | 7 (14.0%)                           | 1 (10%)                              | 3(17.6%)                             | 9 (52.9%)                           | 1 (100%)                            |
| <b>3 sternbrae</b>                                | 27 (54.0%)                          | 8 (80%)                              | 11(64.7%)                            | 5 (29.4%)                           | 0 (0%)                              |
| <b>4 sternbrae but with<br/>3/4 fusion</b>        | 16 (32%)                            | 1 (10%)                              | 3 (17.6%)                            | 3 (17.6%)                           | 0 (0%)                              |
| <b>14 ribs total bilaterally</b>                  | 0 (0%)                              | 0 (0%)                               | 0 (0%)                               | 17 (100%)                           | 1 (100%)                            |
| <b>13 ribs total bilaterally</b>                  | 50 (100%)                           | 10 (100%)                            | 17 (100%)                            | 0 (0%)                              | 0 (0%)                              |
| <b>8 ribs attached to<br/>sternum bilaterally</b> | 0 (0%)                              | 0 (0%)                               | 0 (0%)                               | 17 (100%)                           | 1 (100%)                            |
| <b>7 ribs attached to<br/>sternum bilaterally</b> | 50 (100%)                           | 10 (100%)                            | 17 (100%)                            | 0 (0%)                              | 0 (0%)                              |
| <b>14 Thoracic vertebrae</b>                      | 0 (0%)                              | 0 (0%)                               | 0 (0%)                               | 17 (100%)                           | 1 (100%)                            |
| <b>13 Thoracic vertebrae</b>                      | 50 (100%)                           | 10 (100%)                            | 17 (100%)                            | 0 (0%)                              | 0 (0%)                              |

184 Tabulation regarding the number of sternbrae found in skeletons, including ones in which there was partial  
 185 fusions between the 3rd and 4th sternbrae.

186 A majority of the *Naa10<sup>-Y</sup>* and *Naa10<sup>-/-</sup>* mice also had four instead of the usual three  
 187 sternbrae, which were sometimes fused (**Table 1**). Cervical vertebrae fusion was also

188 demonstrated in *Naa10<sup>-Y</sup>* mice, particularly involving C1 and C2, suggesting possible  
189 anteriorization of C2 into a C1-like phenotype (**Supplement Fig. 3E** and **Supplement Fig.**  
190 **3F**, and **Supplement Table 3**). The number of lumbar vertebrae remained the same, thus  
191 suggesting an anterior transformation of the first sacral vertebra to a lumbar-like phenotype.  
192 These combined observations suggest possible anterior transformations in the *Naa10* mutant  
193 skeletal phenotype, with an anteriorization of C2, a T8 transformation to a T7-like phenotype  
194 with ribs connecting to the sternum, an extra pair of ribs on L1 likely due to an L1  
195 transformation to a T13-like phenotype, and an anterior transformation of the first sacral  
196 vertebra to a lumbar-like phenotype with loss of fusion to the sacral wings.

197 Out of 32 *Naa10<sup>-Y</sup>* that survived past the third day of life and which were then  
198 examined longitudinally, about 60% survived past 200 days of life (~7 months) (**Supplement**  
199 **Fig. 4C**), with some of these then developing hydronephrosis (**Fig. 2C**, middle). They had  
200 some hollowed space in the kidney, which had been filled with fluid and their ureter was  
201 thickened already at P3 stage of prenatal development in some *Naa10<sup>-Y</sup>* mice (**Supplement**  
202 **Fig. 4A**). Commonly, hydronephrosis is caused by a blockage or obstruction in the urinary  
203 tract. We speculate that this swelling in *Naa10* KO (*Naa10<sup>-Y</sup>* and *Naa10<sup>-/-</sup>*) mice is likely  
204 caused by ureteral defects rather than the kidney itself. Moreover, some *Naa10* KO mice  
205 displayed genital defects, such as seminal vesicle malformation and hydrometrocolpos,  
206 respectively (**Fig. 2C**, bottom). Many *Naa10<sup>-/-</sup>* female mice appeared to have decreased  
207 fecundity, although they were fertile upon the first mating, and this decrease in fecundity is  
208 possibly due to the development of hydrometrocolpos (**Fig. 2C**, bottom), which might result  
209 from structural issues, like vaginal atresia or a retained vaginal septum, although this requires  
210 further investigation. Additionally, hydrocephaly became clinically apparent with a round-  
211 shaped head (**Fig. 2C**, upper) in ~40% of the *Naa10<sup>-Y</sup>* mice that had survived past 3 days of  
212 life (**Supplement Fig. 4C**). CT scanning of some of these mice confirmed hydrocephaly as  
213 the primary cause of their rapid deteriorating condition, usually within the first 3 months of  
214 life (**Supplement Fig. 4B** and **4C**). CT scanning did not reveal any obstructive lesions (such  
215 as a tumor) in any of the ventricles that could account for the hydrocephaly. Taken together,  
216 these results indicate that *Naa10* contributes to overall development and is particularly  
217 important for viability.

218 Litter sizes and offspring from other matings were also investigated, as shown in  
219 **Supplement Table 4**. Matings were set up between *Naa10<sup>-/-</sup>* females and C57bl6J WT  
220 (*Naa10<sup>+Y</sup>*) males, involving eleven mating pairs with 7 unique females and 7 unique males.  
221 Of a total of 127 pups that were born, 37 died in the first day of life and were degraded and/or  
222 cannibalized prior to any tail sample being retrieved, thus not being genotyped. This was a  
223 relatively high death rate in the first 24 hours of life (29%), more so than with the other  
224 matings, except for the one between *Naa10<sup>-/-</sup>* females and *Naa10<sup>-Y</sup>* males (**Supplement Table**  
225 **4**). However, this is substantially less than the death rate of 90% (46/51) reported for the  
226 same mating in the Lee *et al.* paper [44], and we currently do not have an explanation for this  
227 discrepancy. Of the remaining 90 pups that could be genotyped, 59 of these were *Naa10<sup>+/-</sup>*  
228 females and 31 were *Naa10<sup>-Y</sup>* males. Seven of the 59 *Naa10<sup>+/-</sup>* females and two of the 31  
229 *Naa10<sup>-Y</sup>* males died in the first 3 days of life (for a total death rate in the first three days for



230 all born pups of 46/127, or 36%), and after this time, none of the remaining *Naa10*<sup>+/-</sup> females  
231 died in the first ten weeks of life (52/59, or 88% overall survival), whereas ten of the  
232 remaining 29 *Naa10*<sup>-Y</sup> males developed hydrocephaly and died in the first ten weeks of life,  
233 for an overall survival of 19/31, or 61%). The death rate for all pups of 36% in the first three  
234 days of life is similar to the rate of 42.4% seen with the mating of *Naa10*<sup>-/-</sup> females with  
235 *Naa10*<sup>-Y</sup> males (**Supplement Table 4**), whereas this rate is higher than that seen for *Naa10*<sup>+/-</sup>  
236 females mated with *Naa10*<sup>+Y</sup> males (15.8%) or with *Naa10*<sup>-Y</sup> males (13.6%).

### 237 *Naa10*-deficient mice have a functionally active NatA complex

238 Prior experiments showed reduced *in vivo* protein amino-terminal acetylation of a few  
239 putative targets in patient cells [25]. Reduced Nt-acetylomes were also observed in the *Naa10*  
240 mutant yeast models [27]. Given these prior reports, we hypothesized that pleiotropic  
241 phenotypes in *Naa10*-deficient mice are due to a decrease in global N-terminal acetylation.  
242 To test our hypothesis, integrated N-terminal peptide enrichment method (iNrich) [45] was  
243 used to analyze the level of protein amino-terminal acetylation in mouse embryonic fibroblast  
244 (MEF) lysates of *Naa10*<sup>+Y</sup> and *Naa10*<sup>-Y</sup>. Since the samples are treated with deuterated acetic  
245 anhydride prior to MS, unacetylated N-terminal site appears with +3 Da mass shift in the MS  
246 spectrum of the corresponding acetylated N-terminal site [46]. The peak intensity ratios of  
247 acetyl/heavy acetyl pairs represent degree of acetylation of the N-terminal site. We found 765  
248 acetyl/heavy acetyl pairs of N-termini throughout five replicates of *Naa10*<sup>+Y</sup> and five  
249 replicates of *Naa10*<sup>-Y</sup> MEFs. Except for the sites detected only in either WT or mutant, 533  
250 N-terminal sites could be compared (see tab called “N-term” in **Supplement Table 5**).  
251 Approximately 98% (n=522) of N-termini sites showed less than 10% variation in the degree  
252 of terminal acetylation, indicating that there is no major difference in amino-terminal  
253 acetylation between *Naa10*<sup>-Y</sup> and *Naa10*<sup>+Y</sup> MEFs (**Fig. 3A**). A more stringent analysis was  
254 also conducted in which peptides had to be detected in all ten samples (i.e. tab marked “N-  
255 term detected in all samples” in **Supplement Table 5**), and this resulted in 152 N-termini  
256 sites, of which only 3 (Rpl27, PPia, and Histone H1.0) had only a slightly greater than 10%  
257 difference in the degree of acetylation between *Naa10*<sup>+Y</sup> and *Naa10*<sup>-Y</sup>. Although this was not  
258 a significant result statistically (p=0.09), it is worth noting that peptidyl-prolyl cis-trans  
259 isomerase A (PPIA), having a 10.3% decrease in amino-terminal acetylation, was previously  
260 identified with decreased amino-terminal acetylation in patient-derived B cells and fibroblasts  
261 in boys with the S37P mutation in NAA10 [25], along with being decreased in siNatA  
262 knockdown HeLa cells [1]. PPIA also had decreased amino-terminal acetylation in one  
263 sample from homozygous null *NAA15*<sup>L314\*/L314\*</sup> induced pluripotent stem cells [47].

264 Overall, given the very minor differences with amino-terminal acetylation, we  
265 measured the *in vitro* amino-terminal acetylation activity of NatA via immunoprecipitation of  
266 the large auxiliary subunit Naa15 from mouse tissues. This analysis showed normal  
267 expression of Naa15 in *Naa10* KO liver tissue as in WT tissues (**Fig. 3B**), and we isolated a  
268 physical complex composed of Naa15 and undefined partners that retains NatA activity from  
269 *Naa10* KO tissues (**Fig. 3C**). These data suggest that despite the loss of *Naa10* in mice, the

270 NatA complex remains active, thus explaining the lack of major differences with amino-  
271 terminal acetylation.

### 272 **A *Naa10* paralog exists in mice**

273 *Naa10* disruption is lethal in a variety of organisms, including *D. melanogaster* [17],  
274 *C. elegans* [18] and *T. brucei* [48]. Given the relatively mild phenotype and no reduction of  
275 the Nt-acetylome in *Naa10* KO mice, we hypothesized that there might be a yet unidentified  
276 paralog of *Naa10*, which can compensate for loss of function in mice. A Blast search for  
277 genomic sequences with homology to *Naa10* exposed several *Naa10* pseudogenes on  
278 chromosome 2, 3, 7, 12, 15 and 18. Additionally, southern blot analysis from C57BL/6J DNA  
279 with *Naa10* cDNA probe detected bands of the expected sizes on the X chromosome  
280 (**Supplement Fig. 5A and Supplement Fig. 5B**), while other bands of unexpected sizes  
281 appeared on other chromosomes 2, 5, 15 and 18. The previously identified *Naa10* paralog  
282 *Naa11* is located on chromosome 5, however, this paralog is only expressed in testes [40]. We  
283 found a predicted gene (Gm16286, UniProt: Q9CQX6) on chromosome 18, with high  
284 similarity to *Naa10*, which we name *Naa12*, and RiboSeq and mRNA traces of this region  
285 suggest possible transcription and translation of this gene (**Supplement Fig. 5C**). The protein  
286 sequence of *Naa12* is >80% identical to *Naa10* and almost 90% identical with *Naa11*  
287 (**Supplement Fig. 6**).

288

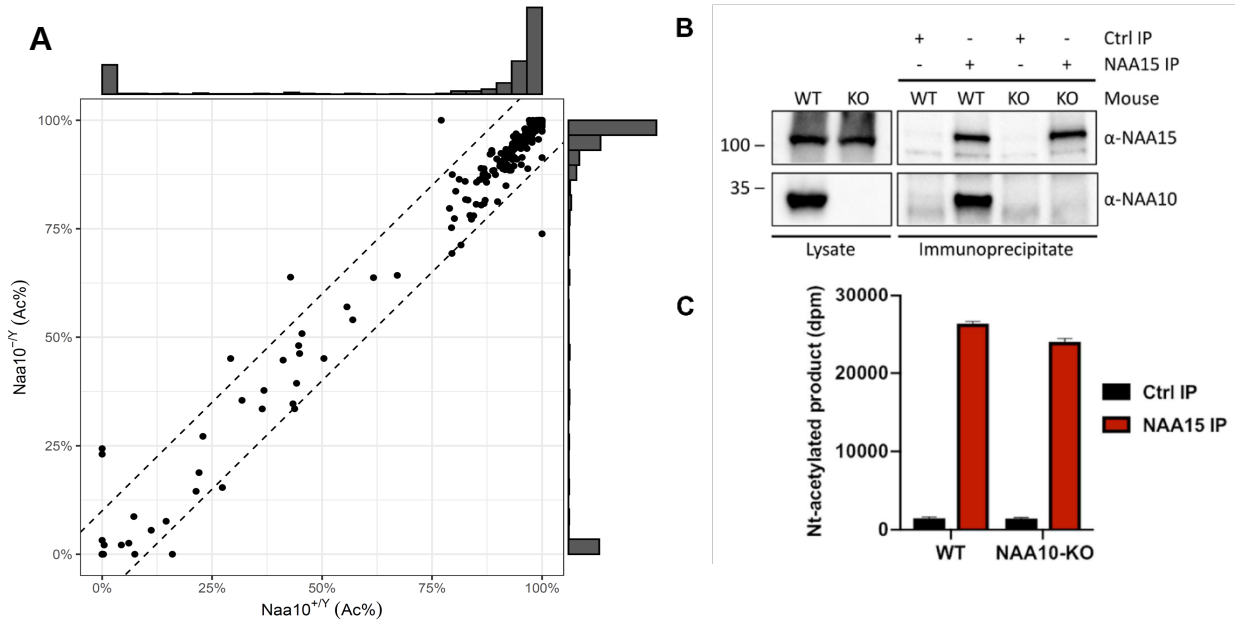

**Fig. 3. Activity measurement of NatA from WT and *Naa10* KO mice.** (A) Correlation of *Naa10* alteration state on amino-terminal acetylation in mouse embryonic fibroblasts (MEFs). Each dot ( $n=533$ ) represents the average amino-terminal acetylation percentage of 5 replicates of *Naa10*<sup>+/Y</sup> and *Naa10*<sup>-Y</sup>, respectively. Dashed lines are the borders of  $\pm 10\%$  difference. Except for the ten dots, 522 of the 533 dots are within the borders. The marginal histograms show the distribution of amino-terminal acetylation data points. (B) Immunoprecipitation of *Naa15*. Liver tissue from WT and *Naa10* KO mouse was lysed and incubated with anti-*Naa15* antibody to retrieve NatA complexes. Proteins were separated by SDS-PAGE and immunoblots probed with anti-*Naa15* antibody and anti-NAA10 antibody. (C) Catalytic activity of immunoprecipitated NatA. The catalytic activity of NatA precipitated from WT and *Naa10* KO mouse liver tissue by anti-*Naa15* was measured towards the NatA substrate peptide SESS<sub>24</sub> in an *in vitro* [<sup>14</sup>C]-Ac-CoA-Based Acetylation Assay. Control reactions were performed with no enzyme or no peptide to account for background signal. The immunoprecipitation (IP) and activity measurements were performed in three independent setups, each with three technical replicates per assay. One representative setup is shown.

289 Quantitative PCR (q-PCR) analysis also confirmed the expression of this transcript in  
 290 all tested tissues (**Supplement Fig. 6A**), with the expression of *Naa12* unchanged in the  
 291 corresponding *Naa10* KO tissues. We attempted to test for *Naa12* expression in mouse tissues  
 292 by developing an antibody specific for *Naa12*, by performing a sequence alignment of the  
 293 two known m*Naa10* isoforms, m*Naa11* and m*Naa12* and selecting a unique *Naa12* peptide  
 294 for immunization and antibody generation (**Supplement Fig. 6B**). After generation and  
 295 affinity-purification, we validated the specificity and sensitivity of this *Naa12* antibody with  
 296 recombinant proteins purified from bacterial hosts (**Supplement Fig. 6C** and **Supplement Fig.**  
 297 **6D**). However, multiple attempts to use this antibody to detect *Naa12* in mouse tissues met  
 298 with conflicting results, so that we were unable to consistently detect *Naa12* even in WT  
 299 liver, kidney, or brain tissue lysates, which could be due to a poor antibody and/or very low  
 300 expression or post-translational modification of *Naa12* in these tissues thus making it difficult  
 301 to detect. Furthermore, given that this antibody was raised against a peptide at the C-terminus  
 302 of *Naa12*, such data could not be used anyway to completely exclude the possibility of  
 303 truncated non-functional mini-protein expression, although the lack of any signal with RT-  
 304 PCR (**Supplement Fig. 7A**) likely means that nonsense-mediated decay occurred. Presently,

305 the rabbit polyclonal antibody is no longer recognizing any consistent protein bands in  
306 Western blotting, so we have abandoned any further attempts to use this antibody.

307 To test whether Naa12 has a similar enzymatic activity as Naa10, we performed a  
308 radioactive-based acetyltransferase assay using synthetic peptides (**Fig. 4A**). Since  
309 monomeric Naa10 preferentially acetylates N-termini with acidic side chains [49-51], we  
310 used peptides representing the N-termini of  $\gamma$ -actin (starting DDDIA-) and  $\gamma$ -actin (starting  
311 EEEIA-), which are two known Naa10 *in vitro* substrates. Additionally, we used a peptide  
312 starting with SESSSKS-, representing an *in vitro* NatA complex substrate High mobility  
313 group protein A1. As expected for the monomeric proteins, we could not detect any activity  
314 towards the SESSSKS-substrate. Importantly, both Naa10 and Naa12 significantly Nt-  
315 acetylated the acidic N-terminal peptides demonstrating the intrinsic capacity of Naa12 to  
316 catalyze amino-terminal acetylation (**Fig. 4A**).

317 Across species, Naa10 is bound to its auxiliary subunit, Naa15, which links the  
318 catalytic subunit to the ribosome to facilitate co-translational amino-terminal acetylation of  
319 proteins as they emerge from the exit tunnel [23, 52-56]. Due to its high sequence similarity  
320 (see also **Supplement Fig. 4B**), we suspected that Naa12 may also interact with Naa15. To  
321 test this hypothesis, we performed co-immunoprecipitation assays in HEK 293 cells. Apart  
322 from Naa10 (isoform 1, Naa10<sup>235</sup>) and Naa12, we also included the second isoform of  
323 mNaa10, mNaa10<sup>225</sup> that has been described earlier [12, 53, 57] as well as Naa11. Both  
324 Naa10 isoforms as well as Naa11 and Naa12 co-precipitated with V5-Naa15 but not V5  
325 alone, suggesting that all tested proteins could form a stable complex with Naa15 in mouse  
326 (**Fig. 4B**). As we have previously purified the human NatA complex composed of truncated  
327 human Naa10 (residues 1-160) and full-length human Naa15 complexes that had been  
328 expressed in insect cells [14], we attempted to co-express a chimeric truncated mouse Naa12  
329 (residues 1-160) with full-length human Naa15 complex in insect cells (human and mouse  
330 Naa15 are highly conserved with a sequence conservation of 98.2%). The complex was  
331 purified by a combination of affinity, ion exchange and size-exclusion chromatography and  
332 size exclusion fractions harboring a clearly detectable band of Naa15 and a lighter band for  
333 Naa12, as determined by silver staining, was analyzed for activity towards a SESSSKS-  
334 peptide (**Fig. 4C and Supplemental Figs. 6E and 6F**). This analysis revealed that peak  
335 fractions containing the Naa12-Naa15 complex harbored detectable amino-terminal  
336 acetylation activity toward the SESSSKS- peptide (**Fig. 4C and Supplemental Fig. 6F**), thus  
337 demonstrating catalytic activity of a NatA complex with mouse Naa12.

338 In a mass spectrometry analysis of a similar setup to that shown in **Fig. 3B**, NAA15  
339 immunoprecipitates from WT or *Naa10*-KO mouse livers were analyzed by mass  
340 spectrometry. We found five distinct peptides derived from Naa12 (**Table 2 and**  
341 **Supplementary Excel File 1**). Three of these derive from the same part of the peptide  
342 sequence, RDLSQMADELRR, and all of these three peptides had one or two missed trypsin  
343 cleavages (DLSQMADELRR, RDLSQMADELRR, and RDLSQMADELRR). The other two  
344 peptides, AMIENFSAK and ENQGSTLPGSEEASQQENLAGGDSGSDGK, are not the  
345 results of missed cleavages. None of these peptides are found in other sequences in the mouse  
346 genome and thus unambiguously identify Naa12 in our experiments. They have higher

347 intensities in Naa15 IPs compared to Ctrl IPs, indicating that Naa12 is selectively enriched by  
 348 Naa15 IP. Some peptides are additionally assigned to the Naa10/Naa11/Naa12 protein group,  
 349 as a large part of their sequences are identical. As expected, no unique Naa10 peptides are  
 350 identified in the IPs from *Naa10*-KO mice. 12 peptides were ambiguously assigned to Naa12  
 351 or to Major urinary proteins (Mup9, Mup8, Mup1, Mup17, Mup5, or Mup2), but these are as  
 352 likely to be derived from Mups as from Naa12, as they have comparable intensities between  
 353 Ctrl and Naa15 IPs.

354

355 **Table 2. Naa10, Naa11 and Naa12 peptides identified by LC-MS/MS analysis in Naa15**  
 356 **IP samples from WT and *Naa10*-KO mouse.**

| Gene name         | Peptide sequence              | Log2 LFQ intensity Naa15-IP |                        |
|-------------------|-------------------------------|-----------------------------|------------------------|
|                   |                               | WT mouse                    | <i>Naa10</i> -KO mouse |
| Naa12             | AMIENFSAK                     | 23.8144                     | 27.5563                |
| Naa12             | DLSQMADELRR                   | 25.2637                     | 28.38                  |
| Naa12             | ENQGSTLPGSEEASQQENLAGGDSGSDGK | 21.299                      | 22.09                  |
| Naa12             | RDLSQMADELRR                  | -                           | 22.20                  |
| Naa12             | RDLSQMADELRR                  | -                           | 27.77                  |
| Naa10             | AALHLYSNTLNFQISEVEPK          | 26.7672                     | -                      |
| Naa10             | AMIENFNAK                     | 27.3981                     | -                      |
| Naa10             | DLTQMADELRR                   | 25.5107                     | -                      |
| Naa10             | GNVLLSSGEACREEK               | 25.0717                     | -                      |
| Naa10             | HMVLAALLENK                   | 25.5293                     | -                      |
| Naa10             | NARPELDMNMQHCHNLLCLPENYQMK    | 25.8928                     | -                      |
| Naa10             | YFYHGLSWPQLSYIAEDENGK         | 26.5915                     | -                      |
| Naa12;Naa11       | AALHLYSNTLNFQVSEVEPK          | -                           | 27.3833                |
| Naa12;Naa11       | YFYHGLSWPQLSYIAEDEDGKIVGYVLAK | -                           | 25.2517                |
| Naa12;Naa11;Naa10 | IVGYVLAK                      | 28.0873                     | 25.7753                |
| Naa12;Naa11;Naa10 | MEEDPDDVPHGHITSLAVK           | 29.1069                     | 29.265                 |
| Naa12;Naa11;Naa10 | MEEDPDDVPHGHITSLAVKR          | 24.7605                     | 21.7784                |
| Naa12;Naa11;Naa10 | YVSLHVR                       | 22.8611                     | 23.7383                |
| Naa12;Naa11;Naa10 | YYADGEDAYAMK                  | -                           | 27.2083                |
| Naa12;Naa11;Naa10 | YYADGEDAYAMKR                 | 27.2319                     | 27.1689                |

357 Samples were run in technical duplicates and the average log2 LFQ intensity of the peptides  
 358 are presented.

359

360

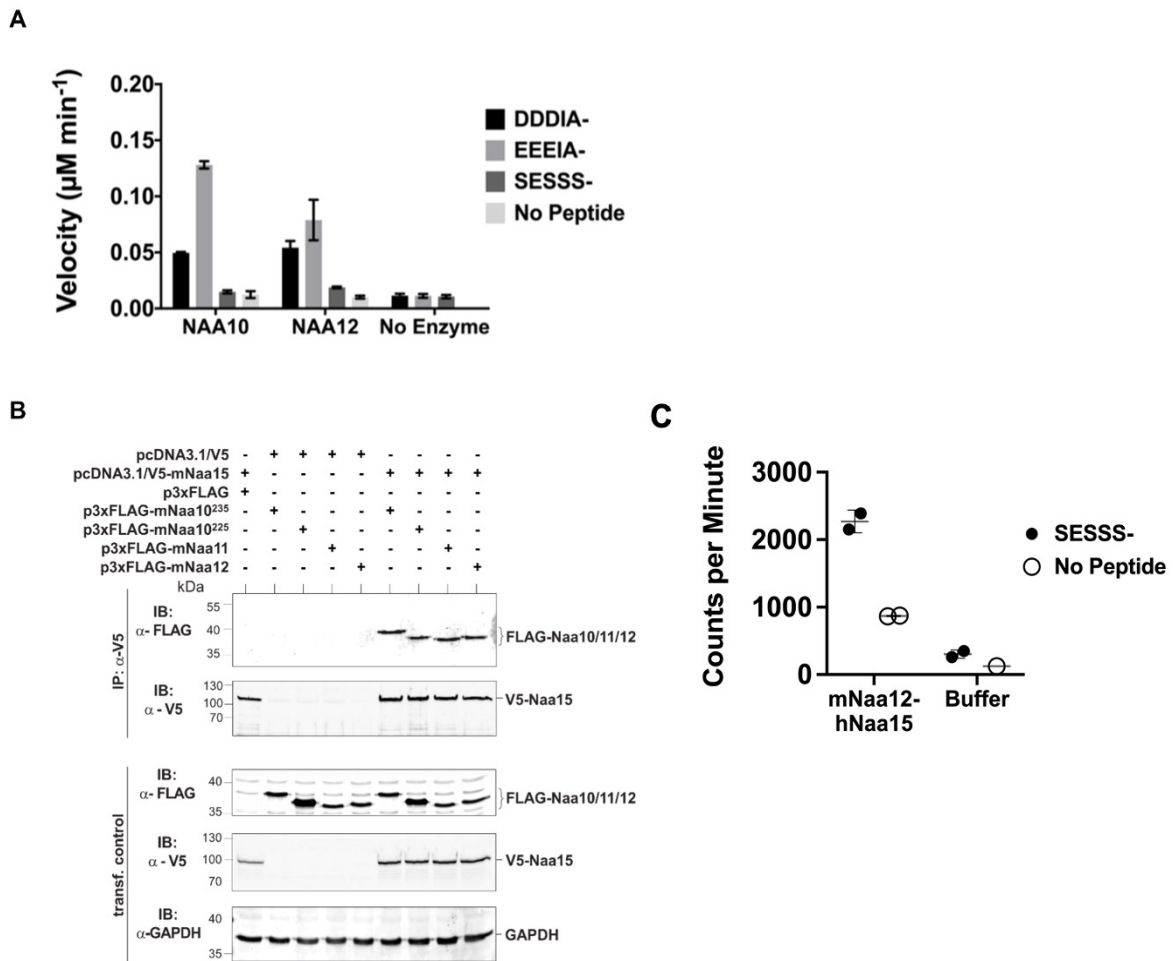

**Fig. 4. Characterization of *Naa12*.** (A) In vitro N-terminal acetyltransferase radioactive-based assay. Comparison of mouse *Naa10* and *Naa12* towards *Naa10* peptide substrates, beta-actin (DDDIA-) and gamma-actin (EEEIA-), and the optimal NatA complex peptide substrate, SESSS-. Background control reactions were performed in the absence of either peptide or enzyme. Assays were performed in triplicate; error bars represent S.E.M. (B) Co-immunoprecipitation assay. HEK293 cells were transfected as indicated and lysed after 48 h. Cell lysates were incubated with 1 µg anti-V5 antibody to precipitate V5-tagged *Naa15*. The isolated complexes were separated on SDS-PAGE and probed with the indicated antibodies. (C) Recombinant mouse *Naa12*/human *Naa15* chimera complex activity. Radioactive acetyltransferase activity assay evaluating the activity of mNaa12-hNaa15 towards peptide (closed circles, “mNaa12-hNaa15”) and peptide chemical acetylation in the absence of enzyme (closed circles, “Buffer”) as well as chemical acetylation of the enzyme in the absence of peptide (open circles) assay and background (open circles). Error bars represent SD of two technical replicates. These are the same results from fraction #14 (both SESSS- and No Peptide) and both Buffer and Background used to illustrate the size-exclusion-purified mNaa12-hNaa15 complex activity in Supplement Fig. 6F.

### 361 *Naa12* rescues loss of *Naa10* in mice

362 To investigate whether *Naa12* can rescue the loss of the function of *Naa10* *in vivo*,  
 363 *Naa12* KO mice were generated using CRISPR technology [58]. One 95-base pair deletion  
 364 Δ131-225 in *Naa12* was characterized in depth (Fig. 5A). This mutation introduces a  
 365 frameshift, leading to a termination codon at amino acid 67, which should either result in  
 366 complete knockout of the protein or, at best, the expression of a truncated mini-protein that

367 would be far shorter than the usual 220 amino acid Naa12. We confirmed the deletion by  
368 PCR with genomic DNA (Fig. 5B). QPCR further showed deletion of *Naa12* in the tested  
369 tissues of *Naa12* KO mice (Fig. 5C), however, it seemed that *Naa12* might be slightly  
370 expressed in testis. Due to the high similarity between *Naa11* and *Naa12*, the expression  
371 shown in *Naa12* KO testis could actually be *Naa11* rather than *Naa12*, and this was  
372 confirmed by RT-PCR showing definite deletion (Supplement Fig. 7A).  
373

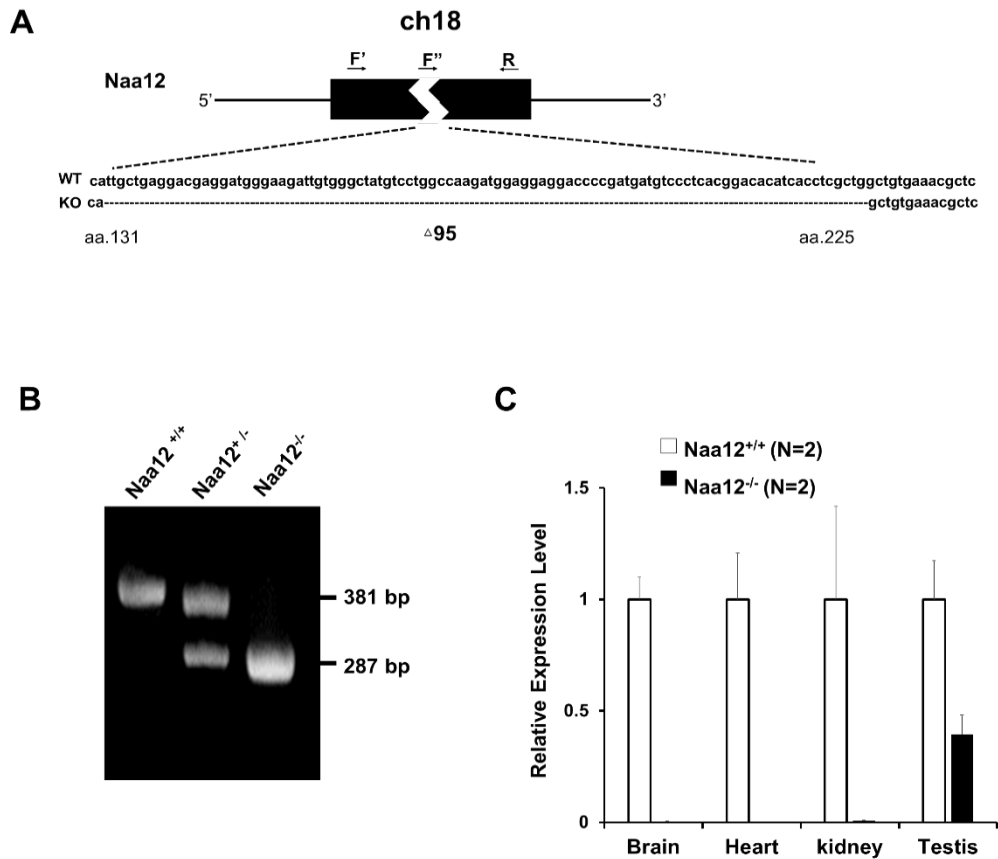

**Fig. 5. Generation of *Naa12* KO mice.** (A) Scheme of *Naa12* (Gm16286, UniProt: Q9CQX6) deletion used to generate *Naa12* KO mouse. 95 base pairs (131-225) were deleted. F'; genomic DNA forward primer, F''; cDNA forward primer, R; reverse primer. (B) Genotyping of *Naa12* KO mice by PCR. WT allele size was 381bp and targeted allele size was 287bp. (C) mRNA level of *Naa12* were analyzed in selected tissues by qPCR. Relative expression level of WT (white bars) and *Naa12* KO (black bars) after normalizing to that of GAPDH.

374 Paralogs are homologous genes that originate from the intragenomic duplication of an  
375 ancestral gene. Homologs that play a compensatory role can sometimes show similar  
376 phenotypes to each other when one of them is deficient [59], whereas other homologs might  
377 only offer partial compensation when the primary gene is more widely expressed or has  
378 higher activity levels. We analyzed *Naa12* KO mice to see if they produced similar  
379 developmental defects to those in *Naa10* KO mice. Knockout mice for this gene were viable

380 (Supplement Table 6). Although there was initially a question of decreased fertility for the  
 381 male mice, larger numbers of matings and litters did not bear this out (Supplement Table 4),  
 382 and necropsy and inspection of testes and seminal vesicles under a stereomicroscope did not  
 383 reveal any macroscopic differences. Furthermore, the phenotypes (piebaldism and bilateral  
 384 supernumerary ribs, Fig. 2B) observed in *Naa10* KO mice with complete penetrance were not  
 385 present in *Naa12* KO mice (Supplement Fig. 7C). Overall, there were not any obvious  
 386 phenotypes in these mice.

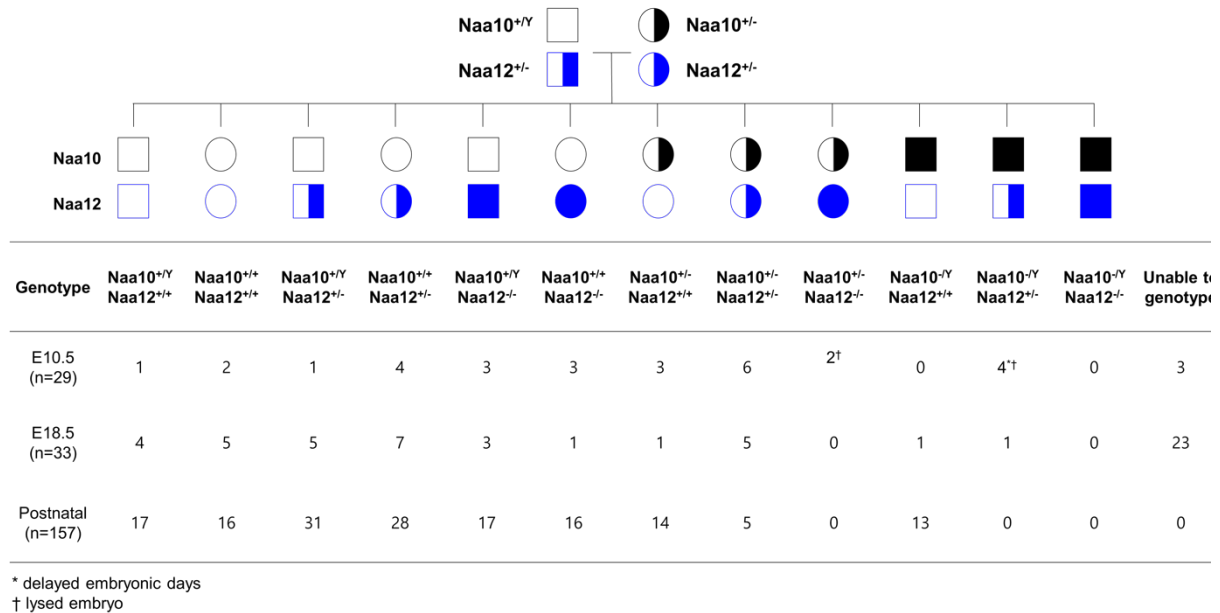

**Fig. 6. Lethality in *Naa10 Naa12* DKO mice.** *Naa10 Naa12* DKO exhibit embryonic lethality. Pedigree and genotypes of pups and embryos at E10.5 and E18.5 from *Naa10*<sup>+/-</sup> *Naa12*<sup>+/-</sup> female mice crossed to the *Naa10*<sup>+Y</sup> *Naa12*<sup>+/-</sup> male mice.

387 Matings between *Naa10*<sup>+/-</sup> *Naa12*<sup>+/+</sup> female mice and either *Naa10*<sup>+Y</sup> *Naa12*<sup>+/-</sup> or  
 388 *Naa10*<sup>+Y</sup> *Naa12*<sup>-/-</sup> males produced zero male *Naa10*<sup>-Y</sup> *Naa12*<sup>+/-</sup> progeny, while also  
 389 suggesting that compound heterozygous (*Naa10*<sup>+/-</sup> *Naa12*) female mice are produced at a rate  
 390 much less than predicted by Mendelian ratios (Supplement Table 7 and Supplement Table  
 391 8). Matings between surviving compound heterozygous (*Naa10*<sup>+/-</sup> *Naa12*<sup>+/-</sup>) females and  
 392 *Naa10*<sup>+Y</sup> *Naa12*<sup>+/-</sup> males demonstrate that no live births occurred for *Naa10 Naa12* double-  
 393 knockout (DKO) males (*Naa10*<sup>-Y</sup> *Naa12*<sup>-/-</sup>) (Fig. 6). In addition, the average litter size was  
 394 small when compared to the control (WT x WT) matings, suggesting embryonic lethality  
 395 (Table 2). In order to determine whether lethality occurs during the embryonic stage, we  
 396 genotyped E18.5 litters – just before birth. Consistent with our previous observations, we  
 397 could not obtain any *Naa10*<sup>-Y</sup> *Naa12*<sup>-/-</sup> embryos, and many embryos could not be genotyped  
 398 because they were already in the midst of resorption (n=23) (Fig. 6). We checked an even  
 399 earlier stage at E10.5 and also found zero *Naa10*<sup>-Y</sup> *Naa12*<sup>-/-</sup> embryos, and also with far fewer  
 400 resorptions at this stage (N=3). Interestingly, we did observe *Naa10*<sup>-Y</sup> *Naa12*<sup>+/-</sup> embryos  
 401 where two of them displayed delayed developmental stage (appearing younger than E10.5)  
 402 and another two embryos were lysed and had already begun degenerating (but despite this,



403 we could at least genotype these embryos). This helps explain why only one *Naa10<sup>-Y</sup>*  
404 *Naa12<sup>+/-</sup>* embryo was observed at E18.5. Furthermore, *Naa10<sup>+/-</sup> Naa12<sup>-/-</sup>* female embryos  
405 were also lysed/degenerating at E10.5 and were not observed from that day onward. Matings  
406 between compound heterozygous females and *Naa10<sup>+Y</sup> Naa12<sup>-/-</sup>* males also did not yield any  
407 *Naa10<sup>-Y</sup> Naa12<sup>-/-</sup>* male mice at any embryonic stage examined, and only a couple of  
408 *Naa10<sup>+/-</sup> Naa12<sup>-/-</sup>* female mice at early stages of development (**Supplement Fig. 8**), and the  
409 litter sizes were even smaller, suggesting increased embryonic lethality (**Table 2**). Consistent  
410 with this, we noted many resorptions at E12.5 and E18.5 that could not be genotyped. The  
411 number of living postnatal compound heterozygous female mice was also considerably lower  
412 than the predicted Mendelian ratios (**Fig. 6** and **Supplement Fig. 8**), and the surviving  
413 *Naa10<sup>+/-</sup> Naa12<sup>+/-</sup>* females were smaller in size than littermate controls (**Fig. 7D**).

414 **Table 2. Litter size of Naa10 Naa12 DKO matings**

| Genotypes of Naa10;<br>Naa12 breeders (♀ x ♂)                                                         | Total number of<br>pups | Total number of<br>litters | Average litter size<br>(pups/litters) | SD of litter<br>size |
|-------------------------------------------------------------------------------------------------------|-------------------------|----------------------------|---------------------------------------|----------------------|
| <i>Naa10<sup>+/+</sup> Naa12<sup>+/+</sup></i> X<br><i>Naa10<sup>+Y</sup> Naa12<sup>+/+</sup></i>     | 206                     | 24                         | 8.6                                   | 1.6                  |
| <i>Naa10<sup>+/-</sup> Naa12<sup>+/-</sup></i> X<br><i>Naa10<sup>+Y</sup> Naa12<sup>+/-</sup></i>     | 157                     | 32                         | 4.9                                   | 1.5                  |
| <i>Naa10<sup>+/-</sup> Naa12<sup>+/-</sup></i> X<br><i>Naa10<sup>+Y</sup> Naa12<sup>-/-</sup> ***</i> | 225                     | 63                         | 3.6                                   | 1.7                  |

415 SD : Standard Deviation

416 \*\*\*This mating was performed at IBR in Staten Island, New York, whereas the other two matings were  
417 performed at Ewha Womans University, Seoul, Republic of Korea.

418 Due to the severe embryonic lethality observed in the *Naa10 Naa12* DKO male mice  
419 and the *Naa10<sup>+/-</sup> Naa12<sup>-/-</sup>* female mice, which was not seen in each single KO (*Naa10* KO or  
420 *Naa12* KO), it seems likely that, without compensation by Naa12, amino-terminal acetylation  
421 is disrupted in *Naa10 Naa12* DKO mice. Together, these data support the compensatory role  
422 of Naa12 *in vivo*.

### 423 **Genotype distribution modeling of Naa10- and Naa12-deficient offspring**

424 The discrepancies we noted between the observed offspring genotype distributions  
425 and the expected Mendelian frequencies prompted us to examine the results from four  
426 matings (**Supplement Table 9 – Supplement Table 14**) with the goal of understanding the  
427 effects of combined *Naa10* and *Naa12* mutations on embryonic and postnatal mortality. We  
428 created mathematical models to predict the observed genotype distribution at each age based  
429 on successive incorporation of assumptions of the lethality of specific offspring genotypes.  
430 Embryonic genotype data was obtained from two matings for which embryonic genotype data  
431 were obtained (**Supplement Table 9** and **Supplement Table 10**). Those matings were (1)  
432 *Naa10<sup>+Y</sup>; Naa12<sup>+/-</sup>* males crossed with *Naa10<sup>+/-</sup>; Naa12<sup>+/-</sup>* females (**Fig. 6; Supplement**  
433 **Table 9**) and (2) *Naa10<sup>+Y</sup>; Naa12<sup>-/-</sup>* males crossed with *Naa10<sup>+/-</sup>; Naa12<sup>+/-</sup>* females  
434 (**Supplement Fig. 8; Supplement Table 10**). The genotype numbering shown in

435 **Supplement Table 9** was used throughout this analysis and the corresponding genotypes for  
436 all other crosses are aligned to have the same numbers. Each model described below adjusted  
437 the expected observed genotype frequencies at each age to account for loss of embryos or  
438 pups due to the predicted lethal effects of one or more genotypes by the method described in  
439 Materials and Methods. Three stages of models (B – D) were compared with the expected  
440 Mendelian distribution (model A).

441 Model B assumed that the double KO male genotype 12 ( $Naa10^{-Y}; Naa12^{-/-}$ ) is lethal  
442 from very early in development based on the observation that this genotype was not found in  
443 any embryos or pups out of 483 obtained genotypes from all litters. Specifically, 0 out of an  
444 expected 7.9 were detected at E10.5 or earlier, 0 out of an expected 14.5 were detected at  
445 E18.5 or earlier and 0 out of an expected 46.7 were detected by postnatal day 3. Thus, the  
446 survival for genotype 12 was 0% for all ages examined.

447 Model C was developed from model B in two stages by incorporating separately  
448 observations that the male genotype 11 ( $Naa10^{-Y}; Naa12^{+/-}$ ) and the female genotype 6  
449 ( $Naa10^{+/-}; Naa12^{-/-}$ ) were lethal during mid to late fetal development. Based on the  
450 Mendelian model, 5 of 9.8 (51%) expected genotype 11 were detected by E10.5 but only 1 of  
451 expected 8.6 (11.6%) were identified on E12.5 or E18.5 and none were detected at postnatal  
452 day 3. The five embryos that were present at E10.5 were noted to be lysed and/or  
453 developmentally delayed; the single E18.5 genotype 11 embryo was not observed to be  
454 abnormal. Based on the Mendelian model for genotype 6, 1 of 2.6 expected E8.5 embryos  
455 and 3 of 5.3 expected E10.5 embryos were identified. All three E10.5 embryos were  
456 identified as lysed. Genotype 6 was not identified after age E10.5. Cumulatively, 4 of 7.9  
457 expected embryos detected by E10.5 and 0 of 38.8 expected embryos/pups thereafter.

458 Model D incorporated the assumptions of models B and C and added adjustments to  
459 the survival rates of genotype 5 ( $Naa10^{+/-}; Naa12^{+/-}$ ) and genotype 10 ( $Naa10^{-Y}; Naa12^{+/-}$ )  
460 based on the observations that these genotypes were underrepresented at late fetal ages or  
461 early postpartum. Genotype 5 was overrepresented during embryogenesis (31 identified but  
462 only 18.4 expected for all embryonic ages) but was underrepresented at P3 (17 of 42  
463 expected) based on the expected Mendelian frequencies. A better analysis was achieved by  
464 comparing the observed genotype frequencies with those predicted by model C because the  
465 expected distributions are significantly affected by the lethal effects of the three genotypes  
466 considered in that model. In that case, the genotype overrepresentation during embryogenesis  
467 is somewhat less (31 identified but only 22.1 expected) but the underrepresentation at P3 is  
468 significantly increased (17 identified of 62 expected, or 27%). Using a model (D<sub>3</sub>) that  
469 incorporated adjusted survival rates for genotypes 12, 11, 6 and 5, we found that genotype 10  
470 remained underrepresented in the observed postnatal offspring counts. The subsequent model  
471 (D<sub>4</sub>) incorporated adjustments to genotype 10 survival rates at E18.5 and P3 to account for  
472 this and then was slightly refined by adjusting other genotype survival rates to maximize the  
473 fit of all genotypes at all ages. The survival values for model D<sub>4</sub> are shown in **Table 3**. A  
474 comparison of the observed offspring numbers with those predicted by the Mendelian  
475 distribution and model D<sub>4</sub> are shown in **Supplement Fig. 9 – Supplement Fig. 12**.

476 **Table 3. Model D<sub>4</sub> Genotype Survival by Age**

| #* | Genotype                                        | E8.5 | E10.5 | E12.5 | E18.5 | Postnatal |
|----|-------------------------------------------------|------|-------|-------|-------|-----------|
| 12 | <i>Naa10<sup>-Y</sup>; Naa12<sup>-/-</sup></i>  | 0%   | 0%    | 0%    | 0%    | 0%        |
| 11 | <i>Naa10<sup>-Y</sup>; Naa12<sup>+/-</sup></i>  | 40%  | 35%   | 10%   | 10%   | 0%        |
| 6  | <i>Naa10<sup>+/-</sup>; Naa12<sup>-/-</sup></i> | 40%  | 33%   | 0%    | 0%    | 0%        |
| 5  | <i>Naa10<sup>+/-</sup>; Naa12<sup>+/-</sup></i> | 100% | 100%  | 100%  | 100%  | 35%       |
| 10 | <i>Naa10<sup>-Y</sup>; Naa12<sup>+/+</sup></i>  | 100% | 100%  | 100%  | 55%   | 55%       |
|    | All Others                                      | 100% | 100%  | 100%  | 100%  | 100%      |

477 \*Genotype number according to **Supplement Table 9**.

478 The observations of reduced survival for selected *Naa10/Naa12* mutants suggests that  
479 *Naa10* is the more dominant function (e.g., is able to provide *Naa12* functions more  
480 successfully than *Naa12* can provide *Naa10* functions) but that two copies of *Naa10* are  
481 required to replace complete loss of *Naa12* in females, possibly due to X-linked inactivation  
482 of *Naa10* during development. The stochastic nature of X-linked inactivation in time and  
483 space may make *Naa10* functionality somewhat unpredictable during development in a  
484 background having a mixture of *Naa10* and *Naa12* mutations.

#### 485 **Statistical examination of weight data in *Naa10*- and *Naa12*-deficient mice**

486 To determine whether *Naa10* and *Naa12* are essential for viability and development,  
487 we examined the survival, weights, and growth rates of 688 *Naa10* and *Naa12* knockout and  
488 wild type mice. The genotypes of mice examined are listed in **Supplement Table 15**. To  
489 avoid potential survival biases, only weights taken during the first 180 days were included.  
490 Growth curves are shown in **Fig. 7**. Age and age-squared (the quadratic term) are both  
491 entered in the analyses; the quadratic term shows the degree to which the effect of age itself  
492 changes with age.

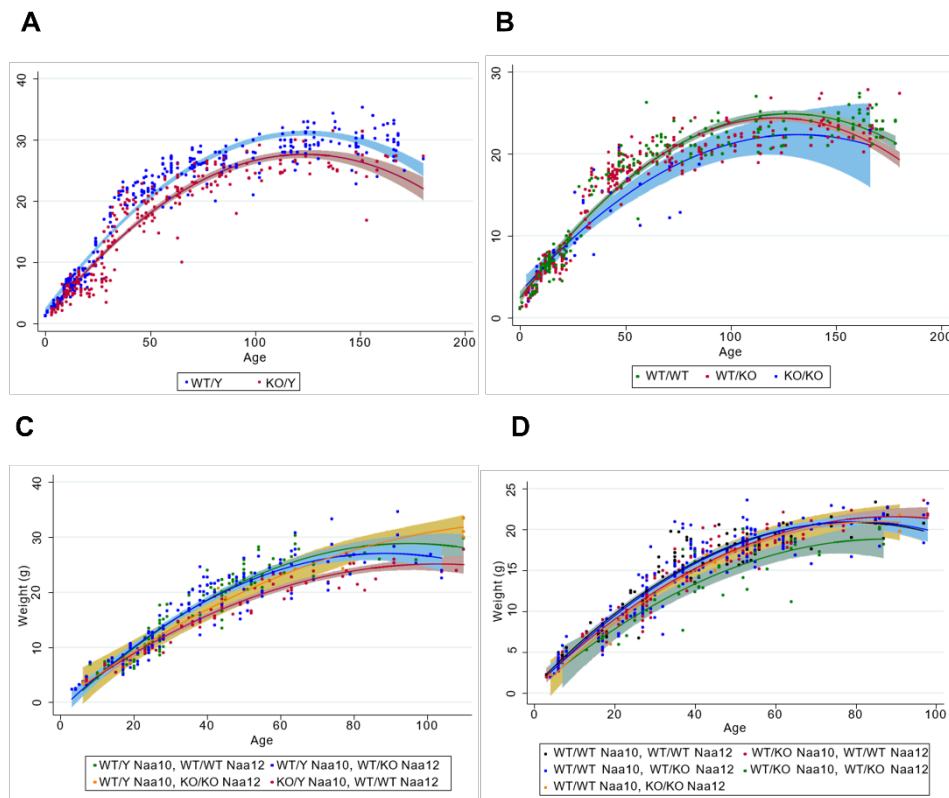

**Fig. 7. Decreased body weight in compound heterozygous females.** (A) Male body weight for the *Naa10* mice on inbred genetic background (8 backcrosses to C57bl6/J). (B) Female body weight for the *Naa10* mice on inbred genetic background (8 backcrosses to C57bl6/J). (C) Male body weight for the *Naa10* and *Naa12* mice on mixed genetic background. (D) Female body weight for the *Naa10* and *Naa12* mice on mixed genetic background.

493           **Supplement Table 16** shows the results in which weight of *Naa10* mice in grams is  
 494 regressed upon age, *Naa10* knockout status, and their interaction. Unsurprisingly, age predicts  
 495 weight for males and females strongly, with growth slowing with age (first column). Though  
 496 a strong negative effect of the knockout is seen in for both males and females (second  
 497 column), when both age and knockout status are modeled together (third column) this effect  
 498 all but disappears in females. Moreover, in females there is no interaction of knockout status  
 499 with age (fourth column), suggesting that the *Naa10* knockout status itself has no significant  
 500 effect on the growth rate in females. For males, however, the main effect of the knockout  
 501 remains when age is included in the model (third column) and the interaction is significant  
 502 (fourth column), indicating that the *Naa10* knockout both reduces weight of males overall  
 503 and lowers the rate of growth.

504           Results of analyses of mixed-genetic background *Naa10/Naa12* mice are shown in  
 505 **Supplement Table 17**. Effects of age and knockouts on weight comprise the upper portion of  
 506 the table, while the lower portion shows their effect on the rate of weight gain. Among  
 507 females a significant reduction of weight (above, second column) and in the rate of growth  
 508 (below, first column) is seen among mice heterozygous for the *Naa10* KO. There were no  
 509 homozygous *Naa10* KO female mixed-breed mice available to analyze, as the matings were  
 510 not set up to yield any such mice (so breeding patterns, not mortality in utero, are the reason

511 for this absence). No significant effect on growth rate is seen for heterozygous or  
512 homozygous *Naa12* KO (above, third column) or for their interactions with age (below,  
513 second column), and only the effects of the heterozygous *Naa10* KO and its interaction with  
514 age are seen in the full model (below, third column). Thus, the *Naa12* KO, whether  
515 heterozygous or homozygous, does not appear to reduce the weight or growth rate of females,  
516 while a heterozygous *Naa10* KO is sufficient to reduce both weight and growth rate.  
517 Interestingly, when modeled together, both the *Naa10* and the *Naa12* KOs significantly  
518 reduced weight (above, fourth column) and the interaction of the *Naa10* and the *Naa12*  
519 heterozygous KOs significantly reduced weight (above, fifth column). As no female mice  
520 were both KO for *Naa10* and homozygous KO for *Naa12*, the effect of the interaction of  
521 those two factors could not be determined. The triple interaction of heterozygous *Naa10* KO,  
522 *Naa12* KO and age was weakly significant, suggesting that the presence of both knockouts  
523 affects growth rate above and beyond the effects of each knockout independently (below,  
524 fourth column). No males with knockouts of both *Naa10* and *Naa12* were born, so no test of  
525 their interaction was possible. An effect was seen for the *Naa10* knockout on weight when  
526 modeled with age and age<sup>2</sup> (second column), and the significant interaction of the *Naa10*  
527 knockout with age and age<sup>2</sup> (third column) shows that the *Naa10* KO in males reduces the  
528 growth rate. As with females, no significant effect of a *Naa12* KO, whether heterozygous or  
529 homozygous, was seen in males, nor is there a significant interaction with age (fourth  
530 column). When the interactions of age with both *Naa10* and *Naa12* knockout status are  
531 entered in one model, *Naa10* alone is seen to reduce growth rates (fifth column).

532

## 533 Discussion

534 We have shown that *Naa10* deficiency results in pleiotropic developmental defects in  
535 two different *Naa10*-deficient mouse models. Similar to infant mortality in some OS males,  
536 the lethality of *Naa10* KO mice increased dramatically in pups in the first 3 days of life (**Fig.**  
537 **1B**). Defects in kidney, brain, pigmentation (piebaldism), and ribs were observed during  
538 embryonic or early postnatal stages in some mice (**Fig. 2B** and **Fig. 2C**). These observed  
539 phenotypes overlap with some of the phenotypes found in surviving humans with OS,  
540 including supernumerary vertebrae and hydrocephaly, although piebaldism has not been  
541 reported to date in any humans. However, the puzzling lack of embryonic lethality in the  
542 *Naa10* KO mice prompted us to discover *Naa12* as a possible compensatory NAT, with  
543 *Naa10*-like amino-terminal acetylation activity (**Fig. 4A**), with an interaction between *Naa15*  
544 and *Naa12* (**Fig. 4B**), and with enzymatic activity in a chimeric complex with human *NAA15*  
545 (**Fig. 4C**). In addition, co-immunoprecipitation of endogenous *Naa15* from *Naa10* KO mouse  
546 tissues followed by mass spectrometry analysis (Error! Reference source not found.) and  
547 amino-terminal acetylation assays (**Fig. 3C**) fully support that the endogenous *Naa12*-*Naa15*  
548 complexes produces NatA activity. Finally, we found genetic proof of the compensatory  
549 activity of *Naa12* in mice when we observed embryonic lethality in in *Naa10 Naa12* DKO  
550 male and *Naa10*<sup>+/-</sup> *Naa12*<sup>-/-</sup> female mice (**Fig. 6** and **Supplement Fig. 7**). This compensation  
551 by *Naa12* explains the mouse proteomics data indicating normal amino-terminal acetylation

552 in *Naa10* KO mice (**Fig. 3A**). We have confirmed the expression of *Naa12* in various tissues  
553 using qPCR and Western blot analyses (**Supplement Fig. 5A-Supplement Fig. 5E**). The  
554 band for *Naa12* runs a little higher in the Western blot than the calculated molecular weight  
555 would suggest, which is consistent with previous observations of NAA10 gel migration.  
556 Future characterization of *Naa12* may define possible post-translational modifications  
557 specific for *Naa12* that might account for the variability of detection by the antibody.

558 Gene duplication has long been believed to be a major driving force in evolution that  
559 provides genetic novelty in organisms. Paralogous genes, originating by small-scale or  
560 whole-genome duplication, overlap functional roles for each other and can completely or  
561 partially compensate for the loss of the duplicate gene [59, 60]. There is not yet any human  
562 reported with complete knockout for *NAA10*. There is one published truncating variant in the  
563 C-terminal portion of NAA10 in a male patient with microphthalmia [35], but unfortunately  
564 there are no cell lines available from this family to confirm whether any truncated NAA10  
565 protein is expressed, as was shown with a splice-site mutation in a Lenz microphthalmia  
566 family [29]. NAA10 was also identified in screens for essential genes in human cell lines [61,  
567 62], so it seems unlikely that an unknown NAA10-like paralogous gene exists in humans,  
568 other than the already known NAA11.

569 The pleiotropic phenotypes shown in *Naa10* KO mice, including hypopigmentation  
570 and supernumerary ribs with a penetrance of 100%, were not observed in the *Naa12* KO  
571 mice. *Naa10* itself has been described to have N-ε-acetyl-activity towards internal lysine  
572 residues of proteins involved in various disease- and development-related signaling pathways  
573 [11], although its acetylation of some substrates is controversial [63, 64]. Since the Nt-  
574 acetylome appears to be globally intact in MEFs from *Naa10* KO mice, it is possible that the  
575 presented phenotypes could be due to the loss of *Naa10*-specific N-ε-acetyl-activity or non-  
576 catalytic roles of *Naa10* [4]. Alternatively, the quantitative expression of *Naa10* and *Naa12*  
577 might be different within or between tissues, which might then explain why there is clearly a  
578 phenotype for *Naa10*<sup>+/-</sup> *Naa12*<sup>+/-</sup> female mice (not born at Mendelian ratios and the few that  
579 are born are usually much smaller) but no apparent phenotype in *Naa10*<sup>+/+</sup> *Naa12*<sup>-/-</sup> female  
580 mice. It seems likely that the mechanism cannot be simply additive between two equally  
581 expressed proteins, because if the expression of each protein is theoretically set at an arbitrary  
582 unit of 10, then *Naa10*<sup>+/-</sup> *Naa12*<sup>+/-</sup> female mice might possibly have half as much of each  
583 protein, so that the total dose of both proteins together would be 10, instead of 20. Likewise,  
584 the total dose of both proteins together would also be predicted to be 10 in a *Naa10*<sup>+/+</sup>  
585 *Naa12*<sup>-/-</sup> female. Yet, the *Naa10*<sup>+/-</sup> *Naa12*<sup>+/-</sup> female mice have a phenotype, whereas the  
586 *Naa10*<sup>+/+</sup> *Naa12*<sup>-/-</sup> female mice do not (**Fig 6**). Therefore, other explanations could include  
587 different tissue-specific dosages of each protein, different expression between different  
588 tissues, possible X-chromosome skewing for the X-linked *Naa10* in different tissues, or  
589 different functions of the two enzymes, including *Naa10*-specific N-ε-acetyl-activity or non-  
590 catalytic roles of *Naa10* [4]. These questions remain unanswered and are worth exploring in  
591 future studies. It is worth highlighting that X-chromosome inactivation could certainly be one  
592 explanation, given that males that are *Naa10*<sup>+Y</sup> with *Naa12*<sup>+/-</sup> or *Naa12*<sup>-/-</sup> show expected

593 survival rates, whereas females that are *Naa10*<sup>+/-</sup> with *Naa12*<sup>+/-</sup> show ~35% survival but with  
594 *Naa12*<sup>-/-</sup> show 0% survival.

595         There are several clinical features that were presented in the original description of  
596 OS [26] which can now be better understood in light of the phenotypes found in the knockout  
597 mouse model. For example, all of the affected children in the first families with OS were  
598 noted to have large and, in some cases, persistently open fontanelles [25, 26]. For one child  
599 (Family 1, Individual II-1), CT scanning revealed cerebral atrophy with enlarged ventricles,  
600 and in another child (Family 1, Individual III-4), there was evidence on magnetic resonance  
601 imaging (MRI) of "moderate lateral and third ventricular dilatation without identified cause".  
602 Lastly, all of the children had respiratory depression and apneic episodes, along with varying  
603 course of hypotonia and/or hypertonia (including documented hyperreflexia in at least one  
604 case (Family 2, Individual III-2)). In retrospect, it seems that these clinical features could be  
605 consistent with mild hydrocephaly in these probands with Ogden syndrome, which resolved  
606 over time. This is also consistent with the ventriculomegaly reported in several female OS  
607 probands with missense mutations in *NAA10*, along with ventriculomegaly in one other male  
608 proband who died in the first week of life, with generalized hypotonia and lack of  
609 spontaneous respirations [65]. One of the female patients with an Arg83Cys mutation in  
610 *Naa10* (#9 in table 1 of that paper) was reported as having intraventricular hemorrhage in the  
611 occipital horn, hypoxic-ischemic encephalopathy, and a ventriculo-peritoneal shunt. It is  
612 possible that this sequence of events is compatible with hydrocephaly with clinical signs and  
613 symptoms that required the placement of the shunt.

614         There are additional cardiac and skeletal features that are also worth re-examining in  
615 light of these new findings. In some of the original cases of OS, there were varying levels of  
616 pulmonary valve stenosis detected on echocardiography, along with some documentation of  
617 pulmonary hypoplasia [26]. For example, individual III-7 in Family 1 was found on  
618 echocardiography to have small persistent ductus arteriosus, a mildly decreased left  
619 ventricular systolic function, an abnormal appearing aortic valve, an enlargement of the right  
620 ventricle, decreased right ventricular systolic function, and persistence of the foramen ovale.  
621 Individual III-6 from this same extended family was found on echocardiography to have a  
622 thickened bicuspid aortic valve and mild pulmonary hypertension. One of the OS female  
623 patients with an Arg83Cys mutation in *NAA10* was reported to have "supernumerary  
624 vertebrae" [65]. Prompted by our findings of supernumerary ribs in the mice, we obtained an  
625 MRI report for this patient, in which the radiologist concluded that there appeared to be 25  
626 distinct vertebrae, as opposed to the usual 24, with a suggestion of a 13th rib, at least on the  
627 right. The report went on to state that "the vertebrae represent 7 cervical vertebrae, 13 rib-  
628 bearing thoracic vertebrae, and 5 lumbar vertebrae, and the L1 vertebra is mildly dysmorphic,  
629 with a suggestion of anterior breaking". In addition, chest and abdominal X-rays from two of  
630 the brothers in generation VI of a family with microphthalmia demonstrated the presence of  
631 13 rib-bearing thoracic vertebrae, alongside the dramatic scoliosis in both individuals. Four  
632 other females carrying mutations in *Naa10* were reported as having either pectus carinatum or  
633 excavatum [65], one of the boys with OS (Family 1, Individual III-4) was noted to have  
634 pectus excavatum, and retrospective review of some of the clinical photographs appears to

635 show mild pectus excavatum in individual III-6 of the same family. Studies of human  
636 populations have shown that the levels of transition may be shifted cephalad, resulting in 23  
637 mobile vertebrae, or shifted caudad, resulting in 25 presacral vertebrae. Such variations may  
638 occur in 2-11% of the population [66]. In addition, the number of ribs can also vary in mice,  
639 as a result of teratogenic and genetic influences [67, 68]. However, the complete penetrance  
640 for supernumerary ribs in the *Naa10*-deficient mice, along with the presence of extras ribs in  
641 some of the patients, suggest that there is a pathway common to humans and mice that is  
642 altered by mutations involving *NAA10*.

643 Several mouse mutants show similar cardiac or skeletal phenotypes to the *Naa10*-  
644 deficient mice. *Pax3* mutants phenocopy our *Naa10*<sup>-/-</sup> mutants, as *Pax3*<sup>+/-</sup> adults exhibit 100%  
645 piebaldism, and exhibit neural crest (NC)-related PTA/DORV with concomitant VSDs [69-  
646 72]. *Pax3* systemic nulls also have skeletal defects due to abnormal somite morphogenesis  
647 [73, 74]. Moreover, *Pax3* cKOs demonstrated that NC-specific deletion is sufficient to cause  
648 DORV/VSDs and death at birth [72, 75], and that restricted deletion within the  
649 neuroepithelium causes congenital hydrocephalus [76]. While *Pax7* systemic deletion does  
650 not cause NC-associated defects, it does exhibit overlapping expression, and *Pax3*-*Pax7*  
651 compound heterozygous mice develop hydrocephalus [76], suggesting combinatorial  
652 function. *Hox C8*<sup>-/-</sup> mice exhibit an extra rib and an extra rib articulating with the sternum  
653 [77, 78], and an unfused sacral vertebra which lead to 27 presacral vertebrae [79], as seen in  
654 our model. *Hox A4*<sup>-/-</sup> mice described in Horan et al. [80] shows cervical fusions of C2/C3, a  
655 rib on C7 not fully penetrant and sternal defects with bone ossification anomalies. *Hox A5*<sup>-/-</sup>  
656 mice display numerous cervico-thoracic defects such as a rib process coming from the 7<sup>th</sup>  
657 cervical vertebra, an increased in the number of sternbrae and total number of ribs [81].  
658 Both *Hox A4*<sup>-/-</sup> and *A5*<sup>-/-</sup> mice exhibit an extra rib articulating with the sternum. *Hox D3*<sup>-/-</sup>  
659 mice are the only Hox gene mutation leading to cervical fusion of both the atlas and axis [82].  
660 *Hox A9*<sup>-/-</sup> mice have anteriorization of both sacral and lumbar parts, with an extra pair of ribs  
661 at the lumbar level. *Hox A9*<sup>-/-</sup> mice do not have any relevant sternal defect [83]. *Hox B9*<sup>-/-</sup>  
662 mice have an extra rib articulating with the sternum and 14 pairs of rib [84]. These  
663 phenotypes, especially *Hox C8*, share common features with the *Naa10*-deficient mice. This  
664 phenotype is also close to the *Rpl38*<sup>-/-</sup> phenotype [85], except for the sacral fusion described  
665 in *Rpl38*<sup>-/-</sup> mice. Interestingly, it was shown that *Hox* genes were dysregulated in this  
666 genotype. The skeletal findings and comparison to other mutant mice suggest a pattern  
667 consistent with a homeotic anterior transformation hypothesis.

668 The developmental role of *Naa10* in mice has been previously described [44]. Lee *et*  
669 *al.* reported embryonic lethality at E12.5-14.5 and beyond (due to placental defects),  
670 hydrocephaly, postnatal growth retardation, and maternal effect lethality in *Naa10* KO mice  
671 and suggested that genomic imprinting dysregulation is associated with those developmental  
672 phenotypes. In the present study, hydrocephaly and postnatal growth retardation were also  
673 apparent, but embryonic lethality was not observed, which prompted the search for and  
674 discovery of *Naa12*. The previous paper [44] did not report the piebaldism, homeotic anterior  
675 transformation, hydronephrosis, and genital defects (such as seminal vesicle malformation  
676 and hydrometrocolpos), nor did they explain the cause of death in the first day of life, which



677 is at least partly due to congenital heart defects, as reported herein. A more recent paper from  
678 the same group reported that conventional and adipose-specific *Naa10p* deletions in mice  
679 resulted in increased energy expenditure, thermogenesis, and beige adipocyte differentiation  
680 in the surviving mice [86], although the authors do not comment on whether any of the male  
681 mice used in that study starting at age 5 weeks ended up developing hydrocephaly and/or  
682 hydronephrosis, which we have observed in older mice. Although the Lee *et al.* paper [44]  
683 reported a very high maternal effect lethality rate of 90% (46/51) (otherwise stated as a  
684 survival rate of 10% (5/51)) for newborns in matings following *Naa10*<sup>-/-</sup> female and  
685 C57BL/6J wild type male intercrossing, this rate was only 29% (37/127) in this same mating  
686 herein in the first 24 hours of life and with a total death rate in the first three days for all  
687 newborns of 46/127, or 36% (**Supplement Table 4**), with this result deriving from a larger  
688 number of mating pairs, litters and pups. Although this rate of 36% is higher than that seen  
689 with matings involving *Naa10*<sup>+/-</sup> females (15.8% and 13.6%) (**Supplement Table 4**), the  
690 explanation for this ~20% difference in survival in the first 3 days of life could involve  
691 differences in maternal care provided by the *Naa10*<sup>+/-</sup> and *Naa10*<sup>-/-</sup> females, but this would  
692 have to be investigated in future studies, involving detailed behavioral and cognitive  
693 assessment of the dams.

694 The reasons for the differences between the studies in regards to maternal effect  
695 lethality and *in utero* lethality are unknown at present. Whilst Lee *et al.* deleted *Naa10* exons  
696 2-6 [44], the current study deleted *Naa10* exons 1-4 or used an allele *Naa10*<sup>tm1a</sup> expressing  $\beta$ -  
697 galactosidase instead of the *Naa10* gene (**Supplement Fig. 1**), and there was not any  
698 significant embryonic lethality in either line (**Supplement Table 1** and **Supplement Table 2**).  
699 All three of these mouse models were made using 129Sv/Ev ES cells, and all three are nulls  
700 lacking Naa10 protein. It is the case that the previous study used the Cre/loxP system to  
701 generate the *Naa10* KO mice, where a floxed *Naa10* female mouse was crossed with the Ella-  
702 Cre transgenic male mouse expressing Cre recombinase for germ line deletion of loxP-  
703 flanked *Naa10*, whereas our mice were made using standard gene-targeting methods without  
704 the use of Cre recombinase, but it is not clear how this would have resulted in embryonic  
705 lethality, particularly as these mice were only used after "at least six generations of backcross  
706 with C57BL/6 mice", which are noted by the authors to be the substrain C57BL/6JNarl, first  
707 established at the Animal Center of National Research Institute from the Jackson Laboratory  
708 (JAX) in 1995. The explanation for differences in embryonic lethality might be more likely  
709 due to different combinations of modifying alleles that are present in the different C57BL/6J  
710 substrain genetic backgrounds, rather than differences in our model systems, and future plans  
711 will address this after back-crossing more than 20 generations to C57BL/6J (imported  
712 annually from JAX) to achieve an entirely inbred line. The impact of genetic background is  
713 supported by the observation that additional null alleles on mixed genetic backgrounds, made  
714 during the process of generating missense mouse models for OS, have far less penetrance for  
715 a range of the various phenotypes, including much less perinatal lethality (unpublished  
716 observations).

717 In conclusion, our study provides strong evidence that Naa10, the catalytic subunit of  
718 N-acetyltransferase A (NatA), is critical for normal development in mice. Furthermore, this

719 study explains the puzzle regarding the lack of complete embryonic lethality in the *Naa10*  
720 knockout mice due to the discovery of a second mouse *Naa10* paralog, which, unlike *Naa11*,  
721 is expressed in the heart as well as other tissues. Taken together, our findings suggest that the  
722 newly identified *Naa12* can functionally rescue *Naa10* loss and act as a catalytic subunit in  
723 mouse NatA complexes.

## 724 **Materials and Methods**

725 **Mice.** All experiments were performed in accordance with guidelines of International Animal  
726 Care and Use Committee (IACUC) of Ewha Womans University, Cold Spring Harbor  
727 Laboratory (CSHL), and Institute for Basic Research in Developmental Disabilities (IBR). At  
728 CSHL and IBR, any matings that required genotyping were screened on a daily basis by  
729 animal husbandry staff, with notation of how many newborn pups were present each  
730 morning, but with paw tattoo and tail genotyping not being performed until day 3 of life, so  
731 as to not disturb the litters and thus to not increase the risk for maternal rejection of the litter.  
732 The stock of C57BL/6J was replenished annually from Jackson Laboratory, so as to avoid  
733 genetic drift from the JAX inbred line.

734 **Generation of *Naa10* deficient mice.** The *Naa10* knockout (KO) mice were generated as  
735 previously described [41]. *Naa10<sup>tm1a</sup>* [B6;129P2-Ard1<sup>tm1a(Eucomm)Gto/J</sup>] (*Naa10<sup>tm1a</sup>*) mice, used  
736 for *Naa10* reporter mouse, were generated using standard method based on a standard gene-  
737 targeting in E14 embryonic stem (ES) cells (129/Sv) by using a targeting vector from  
738 EUCOMM. Correctly targeted ES clones were used for blastocyst microinjection and  
739 generation of chimeric mice. Chimeric mice were crossed to C57BL/6J mice, and then the  
740 progeny were backcrossed to C57BL/6J for more than ten generations. The *Naa10*-deficient  
741 mice used in the weight analyses were derived from mice backcrossed 8 times to a C57BL/6J  
742 inbred genetic background, and this was confirmed with genome scanning at the Jackson  
743 Laboratory, showing heterozygosity for only one marker for 129S1/SvImJ out of 290  
744 autosomal markers tested, thus giving a percentage of C57BL/6J of 99.66%.

745 **Generation of *Naa12* (Gm16286, UniProt: Q9CQX6) knockout mice.** The mice were  
746 made using standard methods by microinjection of CRISPR reagent mix into zygotes  
747 obtained from the mating of B6D2F1 females (i.e. 50% C57BL/6J, 50% DBA/2J (D2))  
748 females to inbred C57BL/6J males. The guide RNA was produced and validated from Sigma  
749 using a Cell-nuclease assay, and the most active guide was selected, which was  
750 *Naa12\_0\_125* (C9587), with a target sequence of: GAGCGTTTCACAGCCAGCG and  
751 including the targeting cr-RNA sequence and the tracrRNA portion. The indels were  
752 transmitted by breeding again to inbred C57BL/6J males, and the resulting progeny were  
753 interbred on a mixed genetic background of approximately 12.5% DBA/2J (D2) / 87.5%  
754 C57BL/6J, for use in the reported experiments, including the weight analyses. Progeny from  
755 these mice have been backcrossed to C57BL/6J for more than ten generations, with no  
756 discernible new phenotypes emerging. Genomic DNA was isolated from paw and tail. DNA  
757 was screened for mutations using PCR and Surveyor assay [87], followed by Sanger  
758 sequencing of selected clones and the use of CRISP-ID [88] to identify putative deletions.

759 **Primers for mice genotyping.** The primers used for *Naa10* KO and *Naa10<sup>tm1a</sup>* genotyping  
760 were *Naa10*-F: 5'-cctcacgtaatgctctgcaa-3', *Naa10*-neo-F: 5'-acgcgtcaccttaat-atgcg-3', *Naa10*-  
761 R: 5'-tgaaagttgagggtgttggga-3', *Naa10<sup>tm1a</sup>*-F: 5'-gcacactctctgaattggac-3', *Naa10<sup>tm1a</sup>*-neo-F: 5'-  
762 ggccgcttttctggattcat-3' and *Naa10<sup>tm1a</sup>*-R: 5'-gcaggggaataaggcattgg-3'. The primers used for

763 Naa12 KO were Naa12 Surveyor F: 5'-gctccacctgctaacctgg-3', Naa12 Surveyor R: 5'-  
764 gccagatgacctgatgaacatgc-3' and HEX-Naa12 Surveyor F: 5'-gctccacctgctaacctgg-3'.

765 **Antibodies.** The following antibodies were used: Rabbit anti-Naa10 (Abcam #ab155687),  
766 rabbit anti-Naa10 (Protein Tech #14803-1-AP), rabbit monoclonal anti-NAA10  
767 (CellSignaling, #13357), goat anti-Naa10 (Santa Cruz, #sc-33256), rabbit anti-Naa10 (Santa  
768 Cruz, #sc-33820), rabbit anti-Naa11 (Novus Biologicals ; #NBP1-90853), mouse anti-  
769 Naa15/NARG1 (Abcam ; #ab60065 ), rabbit polyclonal anti-NAA15 [12], rabbit anti-Naa50  
770 (LifeSpan BioSciences ; #LS-C81324-100), rabbit anti-FLAG (Sigma; #F7425), mouse anti-  
771 GAPDH (Abcam ; #ab9484), goat anti-Actin (Santa Cruz, #1615), mouse anti-GST  
772 (GenScript ; #A00865) and mouse anti-V5 (Life Technologies ; #R960-25). The antibody  
773 against the potential mNaa10 paralog mNaa12 (Gm16286, UniProt: Q9CQX6) was raised in  
774 rabbits after immunization with a synthetic peptide of the Naa12 C-terminus (aa191-205:  
775 QENLAGGDSGSDGKD-C) conjugated to OVA by PrimmBiotech.

776 **Alcian blue and Alizarin red co-staining of skeletons.** After the skin and internal organs  
777 were removed, embryos were fixed in 95% ethanol (EtOH) for 4h, then in 100% acetone for  
778 overnight. Embryos were stained with 0.03% Alcian Blue 8GX in ethanol/ acetic acid (4:1  
779 v/v) for overnight and kept in 1% KOH for 2 days until they became clearly visible, followed  
780 by staining with 0.05% Alizarin Red in 1% KOH for 4h. After washing with 100% Glycerol/  
781 1% KOH (1:1 v/v), skeletons were kept in 100% Glycerol.

782 **Isolation and imaging of mouse embryos.** Timed matings were performed either by using  
783 the presence of a vaginal plug to assess fertilization. The morning vaginal plug was  
784 designated E0.5. Pregnant mice were sacrificed at several time points after conception. The  
785 embryos were isolated in ice-cold PBS with 1% FBS and washed three times in ice-cold PBS.  
786 Embryos were imaged using a Zeiss Axiozoom V16 with Zen software and merged 50 slides  
787 between Z-stack intervals.

788  **$\beta$ -galactosidase staining.** Isolated E10.5 embryos were incubated in fixation solution (4%  
789 paraformaldehyde) at 4°C for 25min. Samples were washed in ice-cold PBS and then  
790 incubated in permeabilization solution (PBS containing 0.01% Na deoxycholate, 0.02%  
791 Nonidet-P40, 2 mM MgCl<sub>2</sub>) for 20 min at 4°C. Subsequently, samples were incubated in  $\beta$ -  
792 gal staining solution (PBS containing 1 mg/mL X-Gal, 5 mM potassium ferrocyanide, 5 mM  
793 potassium ferricyanide, 0.02% Nonidet-P40, 2 mM MgCl<sub>2</sub>) at 37°C overnight. Following  $\beta$ -  
794 gal staining, samples were washed with PBS and incubated in fixation solution at 4°C for  
795 storage.

796 **Hematoxylin and Eosin Staining.** Isolated kidney tissues at E18.5 and P3 were fixed with  
797 4% paraformaldehyde at 4°C for overnight and embedded in paraffin. Samples were  
798 sectioned at 8 micron thick and stained with Hematoxylin (MHS80, Sigma) and Eosin  
799 (HT110116, Sigma) for morphology.

800 **Cloning.** Full-length mouse Naa10 and Naa12 (Gm16286, UniProt: Q9CQX6)  
801 expression vectors were separately constructed using a pMAL-c5x vector. In both cases, the  
802 catalytic subunit contained an N-terminal uncleavable MBP-tag. Bacterial expression vectors  
803 of mNATs were cloned from cDNA generated from mouse liver or testes. mRNA was isolated  
804 using the Oligotex direct mRNA kit (Qiagen) according to the manufacturer  
805 recommendations. 1 $\mu$ g RNA was reverse transcribed with Superscript IV reverse  
806 transcriptase (Thermo Fisher) and Oligo dT(18) primer. The PCR product was digested and

807 cloned into BamHI restriction sites of pGEX-4T1 (GE Healthcare), pMAL-p5X and  
808 p3xFLAG-CMV10 (Sigma-Aldrich) using standard techniques. All constructs were  
809 sequenced to validate correct insert and orientation.

810 **Primers for cloning.** cDNA was amplified using the primers CCG GGA TCC ATG AAC  
811 ATC CGC AAT and CTG GGA TCC CTA GGA GGC AGA GTC AGA for mNaa10 variants,  
812 CCG GGA TCC ATG AAC ATC CGC AAT GC and CTG GGA TCC CTA GGA GAT GGA  
813 ATC CAA GTC for mNaa11, CCG GGA TCC ATG AAC ATC CGC CGG and CTG GGA  
814 TCC CTA GGA GGC GGA CCC TAG for mNaa12.

815 **Peptide competition assay.** To determine the specificity of the mNaa12 antibody, a peptide  
816 competition assay was performed using the same peptide as used for immunization (aa 191-  
817 205: QENLAGGDSGSDGKD-C). 100 µg antibody were bound to 50 mg peptide-coupled  
818 CNBr-Sepharose (10 mg peptide/g Sepharose) in PBS + 0.2 % Triton X-100 for 1 h at 4° C  
819 on an orbital shaker. The beads were pelleted by centrifugation at 2.700 × g for 3 min at 4°C  
820 and 250 µl of the antibody-depleted supernatant diluted in 5 mL TST for detection (1:100  
821 final antibody dilution). Western blots of mouse lysates were probed with the depleted  
822 antibody or untreated antibody as control (1:100 dilution in TST).

823 **Cell lines.** HEK293 cells were purchased from ATCC, authenticated via STR profiling, and  
824 confirmed mycoplasma free.

825 **Co-immunoprecipitation assay.** Protein-protein interaction studies were performed in  
826 HEK293 cells. Briefly, 8 × 10<sup>5</sup> cells were seeded per well in 6-well plates. After 24 h, cells  
827 were co-transfected with pcDNA3.1/V5-His-mNaa15 and p3xFLAG-CMV10-Naa10<sup>235</sup>  
828 (isoform 1), -Naa10<sup>225</sup> (isoform 2), -Naa11 or -Naa12 or the corresponding empty vectors.  
829 Cells were lysed after 48 h in 200 µl PBS-X per well and cellular debris pelleted at 20.800×g  
830 for 10 min at 4°C. 350 µl of the generated lysate was incubated with 1 µg anti-V5 antibody  
831 for 1 h at 4°C, followed by a 30 min incubation with 30 µl protein-A Sepharose (Sigma-  
832 Aldrich). Protein complexes were washed three times by centrifugation (2.700×g, 2 min) and  
833 eluted in 30 µl 2×SDS sample buffer.

834 Proteins were separated by SDS-PAGE and transferred onto a nitrocellulose membrane  
835 (Amersham Protran 0.2 µM NC) by immunoblotting. The membrane was blocked in 5% non-  
836 fat dry milk and incubated overnight with rabbit polyclonal anti-NAA15[12] (1:2000,  
837 BioGenes) and rabbit monoclonal anti-NAA10 (anti-ARD1A, 1:1000, CellSignaling,  
838 #13357) diluted in 1xPBS containing 1% non-fat dry milk and 0.1% Tween. The  
839 immunoblots were washed and incubated for 1 h at RT with HRP-linked secondary antibody  
840 donkey anti-rabbit IgG (GE Healthcare, NA934). The HRP-signal was detected using  
841 SuperSignal™ West Pico PLUS Chemiluminescent Substrate Kit (Thermo Scientific) and  
842 ChemiDoc™ XRS+ system (Bio-Rad) and visualized by Imagelab™ Software (Bio-Rad).

843 **Immunoprecipitation of Naa15 to form NatA complex.** For immunoprecipitation of  
844 Naa15, 90-120 mg liver tissue from a WT- and Naa10 KO mouse was lysed in 500 µl IPH  
845 lysis buffer (50 mM Tris-HCl pH 8.0, 150 mM NaCl, 5 mM EDTA, 0.5% NP-40, 1×  
846 complete EDTA-free protease inhibitor cocktail (Roche) using Kontes Pellet Pestle Motor  
847 and incubated on ice for 40 min. Cell debris was pelleted by centrifugation (17000 × g, 4 °C,  
848 10 min) and the supernatants transferred to new Eppendorf tubes. The protein concentration  
849 was determined by BCA Protein Assay Kit (Thermo Scientific) and the tissue lysates were  
850 subsequently diluted with IPH lysis buffer to an equal protein concentration of 25 µg/µl. The

851 WT- and Naa10 KO tissue lysates were then divided in two, whereof one half was mixed with  
852 15 µg of anti-Naa15 antibody and the other half with 15 µg of anti-V5 antibody as a negative  
853 control. The mixtures were incubated at 4 °C for 3 h on a rotator. Afterwards, 180 µl of  
854 Protein A/G magnetic beads (Millipore) pre-washed in IPH lysis buffer was added to each  
855 sample and incubated overnight. Then, the magnetic beads were washed three times in IPH  
856 lysis buffer and two times in 1x acetylation buffer (100 mM Tris-HCl pH 8.5, 2 mM EDTA,  
857 20% Glycerol) prior to being resuspended in 90 µl of 2x Acetylation buffer and used in a  
858 [<sup>14</sup>C]-Ac-CoA–Based acetylation assay.

859 **[<sup>14</sup>C]-Ac-CoA–based acetylation assay of immunoprecipitated samples.** Three positive  
860 replicates were prepared for each IP sample containing 10 µl IP beads, 200 µM synthetic  
861 oligopeptide SESS<sub>24</sub> (BioGenes), 100 µM [<sup>14</sup>C]-Ac-CoA (Perkin-Elmer) and dH<sub>2</sub>O to a final  
862 volume of 25 µl. In addition, two replicates for each IP sample were prepared without  
863 synthetic oligopeptide as negative controls. The samples were incubated at 37 °C for 45 min  
864 in a thermomixer with shaking at 1400 rpm. Finally, the magnetic beads were isolated and 23  
865 µl of the supernatant transferred to P81 phosphocellulose filter discs (Millipore). The filter  
866 discs were washed three times for 5 min in 10 mM HEPES buffer (pH 7.4) and air dried. To  
867 determine the amount of incorporated [<sup>14</sup>C]-Ac, the filter discs were added to 5 mL Ultima  
868 Gold F scintillation mixture (Perkin-Elmer) and analyzed by a Perkin-Elmer TriCarb  
869 2900TR Liquid Scintillation Analyzer.

870 **Proteomics sample preparation.** Immunoprecipitation of Naa15 from a WT- and Naa10 KO  
871 mouse was performed as described above. Bound proteins were eluted from the magnetic  
872 beads using 60 µl of elution buffer (2% SDS, 100 mM Tris-HCl pH 7.6, 0.1 M DTT) and  
873 heated for 5 min at 95 °C. The eluates were processed for LC-MS/MS analysis using filter-  
874 aided sample preparation (FASP) method[89]. The eluted protein mixtures were mixed with  
875 UA buffer (8 M urea, 100 Mm Tris-HCl pH 8.0) and centrifuged through Microcon 30kDa  
876 MWCO filters followed by Cys-alkylation with 50 mM iodoacetamide dissolved in UA  
877 buffer. Afterwards, the buffer was exchanged with 50 mM ammonium bicarbonate through  
878 sequential centrifugation, proteins were trypsinized (Sequencing Grade Modified Trypsin,  
879 Promega) and digested peptides were collected by centrifugation. Peptides were acidified  
880 using 5% formic acid and desalted using C18-stagetips according to protocol[90]. Briefly, 40  
881 µg peptides from each sample were loaded onto C18-stagetips pre-conditioned with buffer A  
882 (1% formic acid). The C18-stagetips were then washed with buffer A, before peptides were  
883 eluted with buffer B (80% acetonitrile/ACN, 1% formic acid). The final eluate was  
884 concentrated by Speedvac to evaporate ACN and diluted to desired volume with 5% formic  
885 acid.

886 **Mass spectrometric analysis.** 1 µg of the peptide samples were injected into an Ultimate  
887 3000 RSLC system (Thermo Scientific) connected to a Q-Exactive HF mass spectrometer  
888 (Thermo Scientific) equipped with EASY-spray nano-electrospray ion source (Thermo  
889 Scientific). Trapping and desalting was performed with 0.1% TFA (flow rate 5 µl/min, 5 min)  
890 on a pre-column (Acclaim PepMap 100, 2cm x 75µm ID nanoViper column, 3µm C18  
891 beads). Peptides were separated on an analytical column (PepMap RSLC, 50cm x 75 µm i.d.  
892 EASY-spray column, 2µm C18 beads) during a biphasic ACN gradient with a flow rate of  
893 200 nl/min. Solvent A (0.1% FA (vol/vol) in water) and B (100% ACN) were used for the  
894 following gradient composition: 5% B for 5 min, 5-8% B for 0.5 min, 8–24% B for 109.5  
895 min, 24–35% B for 25 min and 35–80% B for 15 min, 80% B for 15 min and conditioning  
896 with 5% B for 20 min. The mass spectrometer was operated in data-dependent mode to  
897 automatically switch between full scan MS and MS/MS acquisition. MS spectra (m/z 375-

898 1500) were acquired with a resolution of 120 000 at m/z 200, automatic gain control (AGC)  
899 target of  $3 \times 10^6$  and maximum injection time (IT) of 100 ms. The 12 most intense peptides  
900 above an intensity threshold (50 000 counts, charge states 2-5) were sequentially isolated to  
901 an AGC target of  $1 \times 10^5$  and maximum IT of 100 ms and isolation width maintained at 1.6  
902 m/z, before fragmentation at a normalised collision energy of 28%. Fragments were detected  
903 in the orbitrap at a resolution of 15 000 at m/z 200, with first mass fixed at m/z 100. Dynamic  
904 exclusion was utilized with an exclusion time of 25 s and “exclude isotopes” enabled. Lock-  
905 mass internal calibration (m/z 445.12003) was used. Raw files were processed with  
906 MaxQuant v. 1.6.17.0 [91] and searched against a database of Swiss-Prot annotated mouse  
907 protein sequences (retrieved 22.06.2018) in which the NAA12 sequence was added manually,  
908 and with a reverse decoy database. MaxQuant was run with default settings. Peptide and  
909 protein identifications were filtered to a 1 % false discovery rate (FDR). Minimum peptide  
910 length was set to 7. Modifications included in protein quantification were oxidation (M), Nt-  
911 acetylation, acetylation (K), and phosphorylation (STY). Other parameters: match between  
912 runs – true, matching time window – 0.7 min, alignment time window – 20 min, find  
913 dependent peptides – true, mass bin size – 0.0065. Protein and peptide intensities were  
914 quantified by label-free quantification (LFQ) [92].

915 **Whole body CT scanning.** CT scans were acquired on a Nanoscan PET/CT scanner from  
916 Mediso using Nucline v2.01 software. All mice were kept sedated under isoflurane anesthesia  
917 for the duration of the scan. Scans were acquired with an X-ray tube energy and current of  
918 70kVp and 280uA respectively. 720 projections were acquired per rotation, for 3 rotations,  
919 with a scan time of approximately 11 minutes, followed by reconstruction with a RamLak  
920 filter and voxel size 40x40x122 $\mu$ m. For *ex vivo* analyses, mouse heads were fixed in 10%  
921 formalin buffered saline, followed by scanning and reconstruction with 1440 projections per  
922 revolution. Cranial volume was measured using VivoQuant software (v2.50patch2), using  
923 the spline tool to manually and accurately draw around the circumference of the cranium on  
924 multiple stepwise 2D slices.

925 **Integrated N-terminal peptide enrichment (iNrich) assay.** iNrich assays were performed as  
926 described [45]. Mouse embryonic fibroblasts (MEFs) were made from E13.5 embryos, using standard  
927 techniques, with DMEM media supplemented with 10% fetal bovine serum (FBS), L-glutamine and  
928 penicillin/streptomycin. Cells were harvested by trypsinization, washed twice with ice-cold PBS  
929 (phosphate-buffered saline, pH 7.4; Gibco), and resuspended in ice-cold lysis buffer containing 0.2 M  
930 EPPS (pH 8.0), 6 M guanidine, 10 mM TCEP (Thermo Fisher Scientific), and 40 mM 2-  
931 chloroacetamide (Sigma-Aldrich). After 10 min of incubation on 95 °C, cells were lysed by  
932 ultrasonication by a BranSonic 400B. The proteins from the cell lysate were isolated by transferring  
933 supernatant after centrifugation at 12000g for 10 min at 4 °C. The protein concentration of the  
934 collected supernatant was determined by BCA (bicinchoninic acid) protein assay. Mass spectrometry  
935 data were uploaded to PRIDE under Project Name: Naa10 mutant mouse N-terminome LC-MS,  
936 Project accession: PXD026410. Data analysis used unpaired, equal variance algorithm for Student’s t-  
937 test.

938 **RNA and protein isolation and assays.** 70-120 mg tissues were lysed in 5  $\mu$ l/mg tissue RIPA  
939 buffer (Sigma) with 1x Complete protease inhibitors and 1 U/ $\mu$ l Superase In RNase inhibitor  
940 (Thermo Scientific) using Fisherbrand Pellet Pestle Cordless Motor. After homogenization  
941 debris was removed by centrifugation at 20.800 g for 10 min at 4°C. Protein concentration  
942 was determined using APA assay (Cytoskeleton Inc.) and 50  $\mu$ g total protein were separated  
943 on SDS-PAGE followed by western blot. Membranes were stained with anti-Naa10, anti-  
944 Naa15 and anti-GAPDH antibodies (all Abcam).

945 For RNA purification, 30  $\mu$ l clarified lysate were mixed with 70  $\mu$ l RNase free water and  
946 RNA isolated using the RNeasy Mini Kit (Qiagen) according the manufacturers  
947 recommendations, including on-column Dnase digest. 1  $\mu$ g RNA was reverse transcribed  
948 using the TaqMan Reverse transcription kit and gene level detection performed using SYBR  
949 Green Master Mix (all Thermo Scientific). Relative expression was normalized to GAPDH  
950 and ACTB.

951 For the characterization of the mNaa12 antibody, tissue was lysed in 2  $\mu$ l per mg tissue PBS-  
952 X (PBS + 0.2 % (v/v) Triton X-100 + 1  $\times$  Complete protease inhibitor cocktail). 10-200  $\mu$ g  
953 lysate were subjected to SDS-PAGE and western blot.

954 **Primers for mice qPCR.** The following primers pairs were used: mNaa10-Exon2/3-F: 5'-  
955 ctcttgccccagctttctt-3' and mNaa10-Exon3/4-R: 5'- tcgtctgggtcctcttccat -3', mNaa11-F: 5'-  
956 accccacaagcaagacagtg-3' and mNaa11-R: 5'- agcgtatgctcaggaaatgctct -3',  
957 mNaa12(Gm16286)-F: 5'-acgcgtatgctatgaagcga-3' and mNaa12(Gm16286)-R: 5'-  
958 ccaggaagtgtgctaccctg-3', mNaa15-F: 5'-gcagagcatggagaaacct-3' and mNaa15-R: 5'-  
959 tctcaaacctctgcgaacca-3', mNaa50-F: 5'-taggatgcttgcacctacc-3' and mNaa50-R: 5'-  
960 gtcaatcgtgactcattgct-3', mGAPDH-F: 5'-aggtcggtgtgaacggattg-3' and mGAPDH-R: 5'-  
961 tgtagaccatgtagtgaggta-3', mACTB-F: 5'-ggctgtattcccctccatcg-3' and mACTB-R: 5'-  
962 ccagttgtaacaatgcatgt-3'.

963 **Expression and purification of WT mouse, Naa10 and Naa12.** All constructs were  
964 expressed in Rosetta (DE3)pLysS competent *E. coli* cells. Cells were grown in LB-media to  
965 OD<sub>600</sub> 0.6-0.7 prior to inducing protein expression with 0.5 mM isopropyl  $\beta$ -D-1-  
966 thiogalactopyranoside (IPTG) at 18°C for ~16 hrs. All subsequent purification steps were  
967 carried out at 4°C. Cells were isolated by centrifugation and lysed in lysis buffer containing  
968 25 mM Tris, pH 8.0, 150 mM NaCl, 10 mM  $\beta$ -mercaptoethanol ( $\beta$ -ME), 10  $\mu$ g/mL  
969 phenylmethanesulfonylfluoride (PMSF), and DNase. The lysate was clarified by  
970 centrifugation and incubated with amylose agarose resin (New England Biolabs) for 1 hour  
971 before washing the resin with  $\geq$ 100 column volumes of lysis buffer and then eluted with ten  
972 column volumes of lysis buffer supplemented with 20 mM maltose. The resulting eluent was  
973 pooled and concentrated to ~10 mg/mL (30 kDa concentrator; Amicon Ultra, Millipore) such  
974 that 500  $\mu$ l was loaded onto on a Superdex 200 Increase 10/300 GL gel filtration column (GE  
975 Healthcare). The gel filtration run was performed in sizing buffer containing 25 mM HEPES,  
976 pH 7.0, 200 mM NaCl, and 1 mM TCEP. After confirming the purity of the peak fractions at  
977 ~14 mL by denaturing SDS-PAGE (15% acrylamide), peak fractions were concentrated to 0.6  
978 (6.1  $\mu$ M) WT mouse Naa10 and 0.3 mg/mL (3.5  $\mu$ M) WT mouse Naa12, as measured by  
979 UV<sub>280</sub> (Nanodrop 2000; Thermo Fisher Scientific), and stored at 4°C.

## 980 **Expression and Purification of recombinant mNaa12 (1-160)-hNaa15 constructs**

981 **Subcloning** Both full-length and truncated (1-160) mouse Naa12 were amplified from the  
982 pMAL-c5x Naa12 plasmid using Q5 HF Master Mix (NEB),  
983 AAAACCCGGGTATGAACATCCGCCGGGCTCGGC as the forward primer, and either  
984 AAAAGGTACCCTAGGAGGCGGACCCTAGGGTCTG (full-length) or  
985 AAAAGGTACCCTACCGTCTCAGCTCATCGGCCATCTG (1-160) as the reverse primer.  
986 An *S. frugiperda* (*Sf9*) pFastBac dual vector containing the sequence for the N-terminally  
987 6xHis-tagged human Naa15 and truncated human Naa10 (residues 1-160) sequences was  
988 digested using KpnI-HF (NEB) and XmaI (NEB) to remove the human Naa10 sequence. The  
989 PCR product was also digested using the same restriction enzymes and ligated into the

990 corresponding restriction sites using Mighty mix (Takara) using standard techniques. Both  
991 constructs were sequenced to validate the insert sequence and directionality.

992 Sf9 cells were grown to a density of  $1 \times 10^6$  cells/ml and infected using the amplified  
993 baculoviruses to an MOI (multiplicity of infection) of  $\sim 1$ -2. Because the full-length mNaa12  
994 construct did not produce protein, cells transfected with mNaa12<sub>1-160</sub>/hNaa15 were grown at  
995 27°C and harvested 48 hours post-infection. All subsequent purification steps were carried  
996 out at 4°C. Following centrifugation of the cells, the pellet was resuspended and lysed in  
997 buffer containing 25 mM Tris, pH 8.0, 500 mM NaCl, 10 mM Imidazole, 10 mM  $\beta$ -ME, 10  
998  $\mu$ g/ml PMSF, DNase, and complete, EDTA-free protease inhibitor tablet (Roche). The lysate  
999 was clarified by centrifugation and incubated with nickel resin (Thermo Scientific) for 1 hr  
1000 before washing the resin with  $\sim 125$  column volumes of lysis buffer and then eluted with ten  
1001 column volumes of elution buffer (25 mM Tris, pH 8.0, 500 mM NaCl, 200 mM Imidazole,  
1002 10 mM  $\beta$ -ME). Eluted protein was diluted to a final salt concentration of 200 mM NaCl and  
1003 loaded onto a 5 mL HiTrap SP ion-exchange column (GE Healthcare). The protein was eluted  
1004 in the same buffer with a salt gradient (200mM-1 M NaCl) over the course of 20 column  
1005 volumes. Using the resulting peak fractions, the remainder of the purification was performed  
1006 as described for the recombinant monomeric mNaa10 and mNaa12. However, resulting size  
1007 exclusion fractions were analyzed by denaturing SDS-PAGE using a 12% acrylamide gel,  
1008 which was then silver stained (Bio Rad) according to manufacturer instructions.

1009 ***In vitro* radioactive acetyltransferase assays with recombinant protein.** For recombinant  
1010 mNaa12 and mNaa10 constructs, the assays were carried out in 40 mM HEPES, pH 7.5 200  
1011 mM NaCl, where reactions were incubated with 150 nM of the gel-filtration purified WT  
1012 mouse Naa10 or Naa12 in a 30  $\mu$ l reaction volume containing each 250  $\mu$ M substrate peptide  
1013 and radiolabeled [<sup>14</sup>C]acetyl-CoA (4 mCi/mmol; PerkinElmer Life Sciences) for 12 min  
1014 (Naa12) or 13 min (Naa10) at 25°C. Respective time points were selected to ensure detection  
1015 of sufficient activity within the linear range as determined by a time course experiment. The  
1016 substrate peptides used in the assay corresponds to the first 7 amino acids of  $\beta$ -actin  
1017 (DDDIAAL-),  $\gamma$ -actin (EEEIAAL-), or the *in vivo* NatA complex substrate High mobility  
1018 group protein A1 (SESSS-), along with C-terminal positively charged residues for capture to  
1019 the anion exchange paper. Background control reactions were performed in the absence of  
1020 enzyme or in the absence of substrate peptide to ensure that any possible signal due to  
1021 chemical acetylation was negligible. Each reaction was performed in triplicate.

1022 To quench the reaction, 20  $\mu$ l of the reaction mixture was added to negatively charged P81  
1023 phosphocellulose squares (EMD Millipore), and the paper disks were immediately placed in  
1024 wash buffer (10 mM HEPES, pH 7.5). The paper disks were washed three times, at 5 min per  
1025 wash, to remove unreacted acetyl-CoA. The papers were then dried with acetone and added  
1026 to 4 mL of scintillation fluid, and the signal was measured with a PerkinElmer Life Sciences  
1027 Tri-Carb 2810 TR liquid scintillation analyzer. The counts per minute were converted to  
1028 molar units using a standard curve of known [<sup>14</sup>C]acetyl-CoA concentrations in scintillation  
1029 fluid.

1030 Full peptide sequences:

1031  $\beta$ -actin: NH2-DDDIAALRWGRPVGRRRRPVRVYP-COOH

1032  $\gamma$ -actin: NH2-EEEIAALRWGRPVGRRRRPVRVYP-COOH

1033 High mobility group protein A1: NH2-SESSSKSRWGRPVGRRRRPVRVYP-COOH



1034 For mNaa12-hNaa15, reactions were carried out similar to the monomeric mNaa12 and  
1035 mNaa10, with the following exceptions: reactions were prepared by combining 21  $\mu$ L of the  
1036 respective fraction or sizing buffer with 5  $\mu$ L of 10X buffer (500 mM HEPES pH 7.5) to yield  
1037 a buffer composed of 50 mM HEPES, pH 7.5, 140 mM NaCl, 0.7 mM TCEP and 250  $\mu$ M of  
1038 each substrate upon reaction initiation. The reactions were allowed to incubate overnight at  
1039 ambient temperatures ( $\sim 25^{\circ}\text{C}$ ) and then quenched as described above. Control reactions were  
1040 conducted in parallel as described above without conversion to molar units. Two technical  
1041 replicates of the reactions were performed.

1042 **Statistical analyses.** Significant differences ( $p < 0.05$ ) are indicated by asterisks. Weight  
1043 analyses were performed using generalized estimating equations (GEEs) [93], an extension of  
1044 generalized linear models which adjusts for the effects of autocorrelation resulting from  
1045 multiple measurements, and implemented within version 15.1 of Stata (Statacorp 2017).

1046 **Genotype Distribution Analyses and Modeling.** Genotype distributions for several  
1047 *Naa10/Naa12* knockout crosses were analyzed and models were created to estimate the  
1048 number of the live (or at least intact) embryos or pups that are expected to be observed based  
1049 on the assumptions and rules that follow. (1) Genotype survival rates are the fractional value,  
1050 from zero to one (or 0% to 100%), of the expected Mendelian fraction for that genotype in  
1051 the cross being evaluated. (2) Genotype survival rates cannot exceed 1 (or 100%). (3)  
1052 Genotype survival rates can decrease with age but not increase. (4) Wild-type genotypes  
1053 (*Naa10*<sup>+/+</sup>; *Naa12*<sup>+/+</sup> and *Naa10*<sup>+/+</sup>; *Naa12*<sup>+/+</sup>) are expected to have 100% survival at all ages  
1054 because the models predict the number of embryos or pups relative to wild-type survival.  
1055 Reductions in overall in litter sizes for crosses were estimated through other calculations. (5)  
1056 The biological basis for a reduced survival rate assumes that loss of one or more copies of  
1057 either *Naa10* or *Naa12* removes or reduces functions that are required for successful  
1058 embryonic development or postnatal life. Reduced survival rates for non-wild-type  
1059 genotypes were estimated based on differences ( $\Delta$ ) between the expected number of  
1060 embryos or pups based on the Mendelian proportion (or the current best model) and the  
1061 observed number of embryos or pups. Separate comparisons were made using  $\Delta$ s for each  
1062 specific age and for the cumulative numbers at each age. (6) Genotype frequencies for each  
1063 model were calculated as described in the section below. (7) The fit between a model and the  
1064 observed data was determined by calculating the relative standard deviation (SD) for the  
1065  $\Delta$ s across all genotypes, e.g. the standard deviation across genotypes divided by the  
1066 number of animals observed (either age-specific or cumulative). Each model was evaluated  
1067 at each age by minimizing the relative SD for all genotypes at that age and over all ages. The  
1068 final model (D<sub>4</sub>) was created by refining the assumptions for model D<sub>3</sub> in a sequential series  
1069 of comparisons of survival rates for genotypes 12, 11, 6, 10 and 5 in that order.

1070 **Genotype Frequency Calculations.** The models described adjust the expected observed  
1071 genotype frequencies at each age to account for loss of embryos or pups due to the presumed  
1072 lethal effects of one or more genotypes. The models account directly for the effect of  
1073 genotype-specific mortality by reducing the number (or frequency) observed for that  
1074 genotype in the sample and thus, increasing the expected proportion of other genotypes. This  
1075 also indirectly implies a larger theoretical litter size at conception, which can be used to  
1076 determine the theoretical litter sizes had there been no mortality in the affected genotypes.  
1077 The predicted proportion for each genotype is calculated at each age as the genotype  
1078 Mendelian frequency multiplied by the fractional genotype survival at that age divided by the  
1079 expected total fractional survival (i.e., one minus the sum of all genotype fractional losses).  
1080 The formula is:

1081 For all “n” possible genotypes

$$1082 \quad G_x = M_x * S_x / (1 - [(1 - S_1) * M_1] + (1 - S_2) * M_2) + \dots + (1 - S_n) * M_n]$$

1083

1084 where:

1085  $G_x$  = Model genotype fractional value (frequency) for genotype “x” ( $G_x$  value from 0  
1086 to 1)

1087  $M_x$  = Mendelian fractional value (frequency) for genotype “x” for the cross

1088  $S_x$  = Fractional survival between 0 and 1

1089  $(1 - S_n) * M_n$  is the fractional reduction due to survival < 100% for genotype “n”, e.g.,

1090 when  $S_n = 1$  (e.g., 100% survival) the loss is zero

1091 when  $S_n = 0$  (e.g., 0% survival) the loss is  $M_n$  or the entire Mendelian fraction.

1092 Note that the sum of all  $G_x$  for all genotypes at any age is always equal to 1 (or 100%).

## 1093 **Acknowledgments**

1094 G.T.O. thanks Huiju Jo for supporting mouse genotyping. G.J.L. would like to thank Ryan  
1095 Driscoll for mouse genotyping, Fatima Inusa for embryo dissection, Jemima Kadima for  
1096 mouse husbandry, Leyi Li for transgenic mouse assistance, Melissa Nashat, Jodi Coblenz,  
1097 Rachel Rubino, and Lisa Bianco for veterinary advice, and Vicky Brandt for editorial  
1098 assistance.

1099 This work was supported by National Research Foundation of Korea (NRF) grants funded by  
1100 the Korean Government (2020R1A3B2079811 (G.O.), 2017RIDIB03032286 (M.L.), and  
1101 2020RICIC1007686 (M.L.)). Research reported in this publication was also supported by the  
1102 National Institute of General Medical Sciences of the National Institutes of Health (NIH)  
1103 under Award Numbers R35GM133408 (G.J.L) and R35GM118090 (R.M.), and NIH grant  
1104 HL148165 (S.J.C.). The work was also supported by the Research Council of Norway  
1105 (Project 249843), the Norwegian Health Authorities of Western Norway (Projects 912176 and  
1106 F-12540-D11382), and the Norwegian Cancer Society (PR-2009-0222). The content is solely  
1107 the responsibility of the authors and does not necessarily represent the official views of the  
1108 National Institutes of Health. Funding was also provided by the Stanley Institute for  
1109 Cognitive Genomics at Cold Spring Harbor Laboratory, the George A. Jervis Clinic and the  
1110 Department of Human Genetics, Laboratory of Genomic Medicine at the New York State  
1111 Institute for Basic Research in Developmental Disabilities (IBR), New York State Office for  
1112 People with Developmental Disabilities. Part of the work was carried out at the Proteomics  
1113 Unit at University of Bergen (PROBE).

## 1114 **Competing interests**

1115 The authors declare no competing interest.

## 1116 **References**

- 1117 1. Arnesen, T., et al., *Proteomics analyses reveal the evolutionary conservation and*  
1118 *divergence of N-terminal acetyltransferases from yeast and humans.* Proc Natl Acad  
1119 Sci U S A, 2009. **106**(20): p. 8157-62.
- 1120 2. Dorfel, M.J. and G.J. Lyon, *The biological functions of Naa10 - From amino-terminal*

- 1121 *acetylation to human disease*. *Gene*, 2015. **567**(2): p. 103-31.
- 1122 3. Polevoda, B., T. Arnesen, and F. Sherman, *A synopsis of eukaryotic Nalpha-terminal*  
1123 *acetyltransferases: nomenclature, subunits and substrates*. *BMC Proc*, 2009. **3 Suppl**  
1124 **6**: p. S2.
- 1125 4. Aksnes, H., R. Ree, and T. Arnesen, *Co-translational, Post-translational, and Non-*  
1126 *catalytic Roles of N-Terminal Acetyltransferases*. *Mol Cell*, 2019. **73**(6): p. 1097-  
1127 1114.
- 1128 5. Starheim, K.K., K. Gevaert, and T. Arnesen, *Protein N-terminal acetyltransferases:*  
1129 *when the start matters*. *Trends Biochem Sci*, 2012. **37**(4): p. 152-61.
- 1130 6. Ree, R., S. Varland, and T. Arnesen, *Spotlight on protein N-terminal acetylation*. *Exp*  
1131 *Mol Med*, 2018. **50**(7): p. 1-13.
- 1132 7. Shemorry, A., C.S. Hwang, and A. Varshavsky, *Control of protein quality and*  
1133 *stoichiometries by N-terminal acetylation and the N-end rule pathway*. *Mol Cell*,  
1134 2013. **50**(4): p. 540-51.
- 1135 8. Dikiy, I. and D. Eliezer, *N-terminal acetylation stabilizes N-terminal helicity in lipid-*  
1136 *and micelle-bound alpha-synuclein and increases its affinity for physiological*  
1137 *membranes*. *J Biol Chem*, 2014. **289**(6): p. 3652-65.
- 1138 9. Holmes, W.M., et al., *Loss of amino-terminal acetylation suppresses a prion*  
1139 *phenotype by modulating global protein folding*. *Nat Commun*, 2014. **5**: p. 4383.
- 1140 10. Scott, D.C., et al., *N-terminal acetylation acts as an avidity enhancer within an*  
1141 *interconnected multiprotein complex*. *Science*, 2011. **334**(6056): p. 674-8.
- 1142 11. Lee, M.N., H.Y. Kweon, and G.T. Oh, *N-alpha-acetyltransferase 10 (NAA10) in*  
1143 *development: the role of NAA10*. *Exp Mol Med*, 2018. **50**(7): p. 87.
- 1144 12. Arnesen, T., et al., *Identification and characterization of the human ARD1-NATH*  
1145 *protein acetyltransferase complex*. *Biochem J*, 2005. **386**(Pt 3): p. 433-43.
- 1146 13. Arnesen, T., et al., *The chaperone-like protein HYPK acts together with NatA in*  
1147 *cotranslational N-terminal acetylation and prevention of Huntingtin aggregation*. *Mol*  
1148 *Cell Biol*, 2010. **30**(8): p. 1898-909.
- 1149 14. Gottlieb, L. and R. Marmorstein, *Structure of Human NatA and Its Regulation by the*  
1150 *Huntingtin Interacting Protein HYPK*. *Structure*, 2018. **26**(7): p. 925-935 e8.
- 1151 15. Arnesen, T., et al., *Induction of apoptosis in human cells by RNAi-mediated*  
1152 *knockdown of hARD1 and NATH, components of the protein N-alpha-*  
1153 *acetyltransferase complex*. *Oncogene*, 2006. **25**(31): p. 4350-60.
- 1154 16. Gendron, R.L., et al., *Loss of tubedown expression as a contributing factor in the*  
1155 *development of age-related retinopathy*. *Invest Ophthalmol Vis Sci*, 2010. **51**(10): p.  
1156 5267-77.
- 1157 17. Wang, Y., et al., *Drosophila variable nurse cells encodes arrest defective 1 (ARD1),*  
1158 *the catalytic subunit of the major N-terminal acetyltransferase complex*. *Dev Dyn*,  
1159 2010. **239**(11): p. 2813-27.
- 1160 18. Chen, D., et al., *daf-31 encodes the catalytic subunit of N alpha-acetyltransferase that*  
1161 *regulates Caenorhabditis elegans development, metabolism and adult lifespan*. *PLoS*  
1162 *Genet*, 2014. **10**(10): p. e1004699.
- 1163 19. Linster, E., et al., *Downregulation of N-terminal acetylation triggers ABA-mediated*  
1164 *drought responses in Arabidopsis*. *Nat Commun*, 2015. **6**: p. 7640.
- 1165 20. Ree, R., et al., *The N-terminal acetyltransferase Naa10 is essential for zebrafish*  
1166 *development*. *Biosci Rep*, 2015. **35**(5).
- 1167 21. Feng, J., et al., *Protein N-terminal acetylation is required for embryogenesis in*  
1168 *Arabidopsis*. *J Exp Bot*, 2016. **67**(15): p. 4779-89.
- 1169 22. Chen, H., et al., *Nalpha-Acetyltransferases 10 and 15 are Required for the Correct*

- 1170 *Initiation of Endosperm Cellularization in Arabidopsis*. Plant Cell Physiol, 2018.  
1171 **59**(10): p. 2113-2128.
- 1172 23. Mullen, J.R., et al., *Identification and characterization of genes and mutants for an N-*  
1173 *terminal acetyltransferase from yeast*. EMBO J, 1989. **8**(7): p. 2067-75.
- 1174 24. Plevoda, B. and F. Sherman, *Composition and function of the eukaryotic N-terminal*  
1175 *acetyltransferase subunits*. Biochem Biophys Res Commun, 2003. **308**(1): p. 1-11.
- 1176 25. Myklebust, L.M., et al., *Biochemical and cellular analysis of Ogden syndrome reveals*  
1177 *downstream Nt-acetylation defects*. Hum Mol Genet, 2015. **24**(7): p. 1956-76.
- 1178 26. Rope, A.F., et al., *Using VAAST to identify an X-linked disorder resulting in lethality*  
1179 *in male infants due to N-terminal acetyltransferase deficiency*. Am J Hum Genet,  
1180 2011. **89**(1): p. 28-43.
- 1181 27. Van Damme, P., et al., *A Saccharomyces cerevisiae model reveals in vivo functional*  
1182 *impairment of the Ogden syndrome N-terminal acetyltransferase NAA10 Ser37Pro*  
1183 *mutant*. Mol Cell Proteomics, 2014. **13**(8): p. 2031-41.
- 1184 28. Dorfel, M.J., et al., *Proteomic and genomic characterization of a yeast model for*  
1185 *Ogden syndrome*. Yeast, 2017. **34**(1): p. 19-37.
- 1186 29. Esmailpour, T., et al., *A splice donor mutation in NAA10 results in the dysregulation*  
1187 *of the retinoic acid signalling pathway and causes Lenz microphthalmia syndrome*. J  
1188 Med Genet, 2014. **51**(3): p. 185-96.
- 1189 30. Popp, B., et al., *De novo missense mutations in the NAA10 gene cause severe non-*  
1190 *syndromic developmental delay in males and females*. Eur J Hum Genet, 2015. **23**(5):  
1191 p. 602-9.
- 1192 31. Casey, J.P., et al., *NAA10 mutation causing a novel intellectual disability syndrome*  
1193 *with Long QT due to N-terminal acetyltransferase impairment*. Sci Rep, 2015. **5**: p.  
1194 16022.
- 1195 32. McTiernan, N., et al., *NAA10 dysfunction with normal NatA-complex activity in a girl*  
1196 *with non-syndromic ID and a de novo NAA10 p.(V111G) variant - a case report*. BMC  
1197 Med Genet, 2018. **19**(1): p. 47.
- 1198 33. Ree, R., et al., *A novel NAA10 p.(R83H) variant with impaired acetyltransferase*  
1199 *activity identified in two boys with ID and microcephaly*. BMC Med Genet, 2019.  
1200 **20**(1): p. 101.
- 1201 34. Stove, S.I., et al., *A novel NAA10 variant with impaired acetyltransferase activity*  
1202 *causes developmental delay, intellectual disability, and hypertrophic cardiomyopathy*.  
1203 Eur J Hum Genet, 2018. **26**(9): p. 1294-1305.
- 1204 35. Cheng, H., et al., *Phenotypic and biochemical analysis of an international cohort of*  
1205 *individuals with variants in NAA10 and NAA15*. Hum Mol Genet, 2019. **28**(17): p.  
1206 2900-2919.
- 1207 36. Cheng, H., et al., *Truncating Variants in NAA15 Are Associated with Variable Levels*  
1208 *of Intellectual Disability, Autism Spectrum Disorder, and Congenital Anomalies*. Am J  
1209 Hum Genet, 2018. **102**(5): p. 985-994.
- 1210 37. Johnston, J.J., et al., *polyadenylation signal variants cause syndromic*  
1211 *microphthalmia*. J Med Genet, 2019. **56**(7): p. 444-452.
- 1212 38. Wu, Y. and G.J. Lyon, *NAA10-related syndrome*. Exp Mol Med, 2018. **50**(7): p. 1-10.
- 1213 39. Arnesen, T., et al., *Characterization of hARD2, a processed hARD1 gene duplicate,*  
1214 *encoding a human protein N-alpha-acetyltransferase*. BMC Biochem, 2006. **7**: p. 13.
- 1215 40. Pang, A.L., et al., *Expression of human NAA11 (ARD1B) gene is tissue-specific and is*  
1216 *regulated by DNA methylation*. Epigenetics, 2011. **6**(11): p. 1391-9.
- 1217 41. Yoon, H., et al., *NAA10 controls osteoblast differentiation and bone formation as a*  
1218 *feedback regulator of Runx2*. Nat Commun, 2014. **5**: p. 5176.

- 1219 42. Conway, S.J., et al., *What cardiovascular defect does my prenatal mouse mutant have,*  
1220 *and why?* *Genesis*, 2003. **35**(1): p. 1-21.
- 1221 43. Pun, A., et al., *Genetic parameters for birthweight environmental variability in mice.* *J*  
1222 *Anim Breed Genet*, 2013. **130**(5): p. 404-14.
- 1223 44. Lee, C.C., et al., *The Role of N-alpha-acetyltransferase 10 Protein in DNA*  
1224 *Methylation and Genomic Imprinting.* *Mol Cell*, 2017. **68**(1): p. 89-103 e7.
- 1225 45. Ju, S., et al., *iNrich, Rapid and Robust Method to Enrich N-Terminal Proteome in a*  
1226 *Highly Multiplexed Platform.* *Anal Chem*, 2020. **92**(9): p. 6462-6469.
- 1227 46. Van Damme, P., et al., *NatF contributes to an evolutionary shift in protein N-terminal*  
1228 *acetylation and is important for normal chromosome segregation.* *PLoS Genet*, 2011.  
1229 **7**(7): p. e1002169.
- 1230 47. Ward, T., et al., *Mechanisms of Congenital Heart Disease Caused by NAA15*  
1231 *Haploinsufficiency.* *Circ Res*, 2021. **128**(8): p. 1156-1169.
- 1232 48. Ingram, A.K., G.A. Cross, and D. Horn, *Genetic manipulation indicates that ARD1 is*  
1233 *an essential N(alpha)-acetyltransferase in Trypanosoma brucei.* *Mol Biochem*  
1234 *Parasitol*, 2000. **111**(2): p. 309-17.
- 1235 49. Foyn, H., et al., *Design, synthesis, and kinetic characterization of protein N-terminal*  
1236 *acetyltransferase inhibitors.* *ACS Chem Biol*, 2013. **8**(6): p. 1121-7.
- 1237 50. Van Damme, P., et al., *Proteome-derived peptide libraries allow detailed analysis of*  
1238 *the substrate specificities of N(alpha)-acetyltransferases and point to hNaa10p as the*  
1239 *post-translational actin N(alpha)-acetyltransferase.* *Mol Cell Proteomics*, 2011.  
1240 **10**(5): p. M110 004580.
- 1241 51. Liszczak, G., et al., *Molecular basis for N-terminal acetylation by the heterodimeric*  
1242 *NatA complex.* *Nat Struct Mol Biol*, 2013. **20**(9): p. 1098-105.
- 1243 52. Sugiura, N., S.M. Adams, and R.A. Corriveau, *An evolutionarily conserved N-*  
1244 *terminal acetyltransferase complex associated with neuronal development.* *J Biol*  
1245 *Chem*, 2003. **278**(41): p. 40113-20.
- 1246 53. Park, E.C. and J.W. Szostak, *ARD1 and NAT1 proteins form a complex that has N-*  
1247 *terminal acetyltransferase activity.* *EMBO J*, 1992. **11**(6): p. 2087-93.
- 1248 54. Gautschi, M., et al., *The yeast N(alpha)-acetyltransferase NatA is quantitatively*  
1249 *anchored to the ribosome and interacts with nascent polypeptides.* *Mol Cell Biol*,  
1250 **23**(20): p. 7403-14.
- 1251 55. Magin, R.S., et al., *Probing the interaction between NatA and the ribosome for co-*  
1252 *translational protein acetylation.* *PLoS One*, 2017. **12**(10): p. e0186278.
- 1253 56. Varland, S. and T. Arnesen, *Investigating the functionality of a ribosome-binding*  
1254 *mutant of NAA15 using Saccharomyces cerevisiae.* *BMC Res Notes*, 2018. **11**(1): p.  
1255 404.
- 1256 57. Kim, S.H., et al., *Characterization of ARD1 variants in mammalian cells.* *Biochem*  
1257 *Biophys Res Commun*, 2006. **340**(2): p. 422-7.
- 1258 58. Singh, P., J.C. Schimenti, and E. Bolcun-Filas, *A mouse geneticist's practical guide to*  
1259 *CRISPR applications.* *Genetics*, 2015. **199**(1): p. 1-15.
- 1260 59. Peng, J., *Gene redundancy and gene compensation: An updated view.* *J Genet*  
1261 *Genomics*, 2019. **46**(7): p. 329-333.
- 1262 60. Veitia, R.A., *Gene Duplicates: Agents of Robustness or Fragility?* *Trends Genet*,  
1263 **33**(6): p. 377-379.
- 1264 61. Blomen, V.A., et al., *Gene essentiality and synthetic lethality in haploid human cells.*  
1265 *Science*, 2015. **350**(6264): p. 1092-6.
- 1266 62. Wang, T., et al., *Identification and characterization of essential genes in the human*  
1267 *genome.* *Science*, 2015. **350**(6264): p. 1096-101.

- 1268 63. Magin, R.S., Z.M. March, and R. Marmorstein, *The N-terminal Acetyltransferase*  
1269 *Naa10/ARD1 Does Not Acetylate Lysine Residues*. J Biol Chem, 2016. **291**(10): p.  
1270 5270-7.
- 1271 64. Vo, T.T.L., et al., *Characterization of Lysine Acetyltransferase Activity of*  
1272 *Recombinant Human ARD1/NAA10*. Molecules, 2020. **25**(3).
- 1273 65. Saunier, C., et al., *Expanding the Phenotype Associated with NAA10-Related N-*  
1274 *Terminal Acetylation Deficiency*. Hum Mutat, 2016. **37**(8): p. 755-64.
- 1275 66. Bornstein, P.E. and R.R. Peterson, *Numerical variation of the presacral vertebral*  
1276 *column in three population groups in North America*. Am J Phys Anthropol, 1966.  
1277 **25**(2): p. 139-46.
- 1278 67. McLAREN, A. and D. MICHIE, *Factors affecting vertebral variation in mice. 4.*  
1279 *Experimental proof of the uterine basis of a maternal effect*. J Embryol Exp Morphol,  
1280 1958. **6**(4): p. 645-59.
- 1281 68. Chernoff, N. and J.M. Rogers, *Supernumerary ribs in developmental toxicity*  
1282 *bioassays and in human populations: incidence and biological significance*. J Toxicol  
1283 Environ Health B Crit Rev, 2004. **7**(6): p. 437-49.
- 1284 69. Conway, S.J., D.J. Henderson, and A.J. Copp, *Pax3 is required for cardiac neural*  
1285 *crest migration in the mouse: evidence from the splotch (Sp2H) mutant*. Development,  
1286 1997. **124**(2): p. 505-14.
- 1287 70. Conway, S.J., et al., *Development of a lethal congenital heart defect in the splotch*  
1288 *(Pax3) mutant mouse*. Cardiovasc Res, 1997. **36**(2): p. 163-73.
- 1289 71. van den Hoff, M.J. and A.F. Moorman, *Cardiac neural crest: the holy grail of cardiac*  
1290 *abnormalities?* Cardiovasc Res, 2000. **47**(2): p. 212-6.
- 1291 72. Olaopa, M., et al., *Pax3 is essential for normal cardiac neural crest morphogenesis*  
1292 *but is not required during migration nor outflow tract septation*. Dev Biol, 2011.  
1293 **356**(2): p. 308-22.
- 1294 73. Henderson, D.J., S.J. Conway, and A.J. Copp, *Rib truncations and fusions in the Sp2H*  
1295 *mouse reveal a role for Pax3 in specification of the ventro-lateral and posterior parts*  
1296 *of the somite*. Dev Biol, 1999. **209**(1): p. 143-58.
- 1297 74. Dickman, E.D., R. Rogers, and S.J. Conway, *Abnormal skeletogenesis occurs*  
1298 *coincident with increased apoptosis in the Splotch (Sp2H) mutant: putative roles for*  
1299 *Pax3 and PDGFRalpha in rib patterning*. Anat Rec, 1999. **255**(3): p. 353-61.
- 1300 75. Koushik, S.V., et al., *Generation of a conditional loxP allele of the Pax3 transcription*  
1301 *factor that enables selective deletion of the homeodomain*. Genesis, 2002. **32**(2): p.  
1302 114-7.
- 1303 76. Zhou, H.M. and S.J. Conway, *Restricted Pax3 Deletion within the Neural Tube*  
1304 *Results in Congenital Hydrocephalus*. J Dev Biol, 2016. **4**(1).
- 1305 77. Le Mouellic, H., Y. Lallemand, and P. Brulet, *Homeosis in the mouse induced by a*  
1306 *null mutation in the Hox-3.1 gene*. Cell, 1992. **69**(2): p. 251-64.
- 1307 78. Juan, A.H. and F.H. Ruddle, *Enhancer timing of Hox gene expression: deletion of the*  
1308 *endogenous Hoxc8 early enhancer*. Development, 2003. **130**(20): p. 4823-4834.
- 1309 79. van den Akker, E., et al., *Axial skeletal patterning in mice lacking all paralogous*  
1310 *group 8 Hox genes*. Development, 2001. **128**(10): p. 1911-21.
- 1311 80. Horan, G.S., et al., *Homeotic transformation of cervical vertebrae in Hoxa-4 mutant*  
1312 *mice*. Proc Natl Acad Sci U S A, 1994. **91**(26): p. 12644-8.
- 1313 81. Jeannotte, L., et al., *Specification of axial identity in the mouse: role of the Hoxa-5*  
1314 *(Hox1.3) gene*. Genes Dev, 1993. **7**(11): p. 2085-96.
- 1315 82. Condie, B.G. and M.R. Capecchi, *Mice homozygous for a targeted disruption of*  
1316 *Hoxd-3 (Hox-4.1) exhibit anterior transformations of the first and second cervical*

- 1317        *vertebrae, the atlas and the axis*. Development, 1993. **119**(3): p. 579-95.
- 1318    83.    Fromental-Ramain, C., et al., *Specific and redundant functions of the paralogous*  
1319        *Hoxa-9 and Hoxd-9 genes in forelimb and axial skeleton patterning*. Development,  
1320        1996. **122**(2): p. 461-72.
- 1321    84.    Chen, F. and M.R. Capecchi, *Targeted mutations in hoxa-9 and hoxb-9 reveal*  
1322        *synergistic interactions*. Dev Biol, 1997. **181**(2): p. 186-96.
- 1323    85.    Kondrashov, N., et al., *Ribosome-mediated specificity in Hox mRNA translation and*  
1324        *vertebrate tissue patterning*. Cell, 2011. **145**(3): p. 383-397.
- 1325    86.    Lee, C.C., et al., *Naa10p Inhibits Beige Adipocyte-Mediated Thermogenesis through*  
1326        *N-alpha-acetylation of Pgc1alpha*. Mol Cell, 2019. **76**(3): p. 500-515 e8.
- 1327    87.    Qiu, P., et al., *Mutation detection using Surveyor nuclease*. Biotechniques, 2004.  
1328        **36**(4): p. 702-7.
- 1329    88.    Dehairs, J., et al., *CRISP-ID: decoding CRISPR mediated indels by Sanger*  
1330        *sequencing*. Sci Rep, 2016. **6**: p. 28973.
- 1331    89.    Wisniewski, J.R., et al., *Universal sample preparation method for proteome analysis*.  
1332        Nat Methods, 2009. **6**(5): p. 359-62.
- 1333    90.    Rappsilber, J., M. Mann, and Y. Ishihama, *Protocol for micro-purification,*  
1334        *enrichment, pre-fractionation and storage of peptides for proteomics using StageTips*.  
1335        Nat Protoc, 2007. **2**(8): p. 1896-906.
- 1336    91.    Cox, J. and M. Mann, *MaxQuant enables high peptide identification rates,*  
1337        *individualized p.p.b.-range mass accuracies and proteome-wide protein*  
1338        *quantification*. Nat Biotechnol, 2008. **26**(12): p. 1367-72.
- 1339    92.    Cox, J., et al., *Accurate proteome-wide label-free quantification by delayed*  
1340        *normalization and maximal peptide ratio extraction, termed MaxLFQ*. Mol Cell  
1341        Proteomics, 2014. **13**(9): p. 2513-26.
- 1342    93.    Zeger, S.L. and K.Y. Liang, *Longitudinal data analysis for discrete and continuous*  
1343        *outcomes*. Biometrics, 1986. **42**(1): p. 121-30.
- 1344

1345 **Supporting information**

1346 **Supplement Table 1. Genotypes of offspring from *Naa10*<sup>+/-</sup> female mice crossed to the *Naa10*<sup>+Y</sup>**  
 1347 **male mice.**

| Genotype<br>(Expected Mendelian %) | <i>Naa10</i> <sup>+Y</sup> or<br><i>Naa10</i> <sup>+/+</sup> (50%) | <i>Naa10</i> <sup>+/-</sup> (25%) | <i>Naa10</i> <sup>-Y</sup> (25%) |
|------------------------------------|--------------------------------------------------------------------|-----------------------------------|----------------------------------|
| E10.5 (n=134)                      | 62 (46.3%)                                                         | 39 (29.1%)                        | 33 (24.6%)                       |
| E13.5 (n=98)                       | 53 (54.1%)                                                         | 22 (22.4%)                        | 23 (23.4%)                       |
| E18.5 (n=170)                      | 82 (48.2%)                                                         | 49 (28.8%)                        | 39 (23.0%)                       |
| Adults (n=733)                     | 438 (59.8%)                                                        | 207 (28.2%)                       | 88 (12.0%)                       |

1348 Expected and observed Mendelian ratio of genotypes in offspring at E10.5, E13.5, E18.5 and adults  
 1349 from crosses of *Naa10*<sup>+/-</sup> female and *Naa10*<sup>+Y</sup> male mice. The percentage of adult *Naa10*<sup>-Y</sup> mice  
 1350 significantly decreases.

1351 **Supplement Table 2. Genotypes of offspring from *Naa10*<sup>+tm1a</sup> female mice crossed to the**  
 1352 ***Naa10*<sup>+Y</sup> male mice.**

| Genotype<br>(Expected Mendelian %) | <i>Naa10</i> <sup>+Y</sup> or<br><i>Naa10</i> <sup>+/+</sup> (50%) | <i>Naa10</i> <sup>+tm1a</sup> (25%) | <i>Naa10</i> <sup>tm1a/Y</sup> (25%) |
|------------------------------------|--------------------------------------------------------------------|-------------------------------------|--------------------------------------|
| E10.5 (n=109)                      | 55 (50.46%)                                                        | 26 (23.85%)                         | 28 (25.69%)                          |
| E12.5 (n=45)                       | 20 (44.4%)                                                         | 12 (26.7%)                          | 13 (28.9%)                           |
| E18.5 (n=53)                       | 27 (51.0%)                                                         | 13 (24.5%)                          | 13 (24.5%)                           |
| Adults (n=260)                     | 152 (58.5%)                                                        | 85 (32.7%)                          | 23 (8.8%)                            |

1353 Expected and observed Mendelian ratio of genotypes in offspring at E10.5, E13.5, E18.5 and adults  
 1354 from crosses of *Naa10*<sup>+tm1a</sup> female and *Naa10*<sup>+Y</sup> male mice. The percentage of adults *Naa10*<sup>tm1a/Y</sup>  
 1355 mice significantly decreases.

1356 **Supplement Table 3. Cervical fusion skeletal analyses in *Naa10* KO mice.**

| genotype                    | sample size | one or more fusion events | two or more fusion events | consecutive fusion events | C1+2 fusion | C2+3 fusion | C3+4 fusion | C4+5 fusion | C5+6 fusion | C6+7 fusion | C7+ T1 fusion | T1+2 fusion |
|-----------------------------|-------------|---------------------------|---------------------------|---------------------------|-------------|-------------|-------------|-------------|-------------|-------------|---------------|-------------|
| <i>Naa10</i> <sup>+Y</sup>  | 19          | 2/17 (12%)                | 1/17 (6%)                 | 0/17 (0%)                 | 2/17 (12%)  | 0/18 (0%)   | 0/18 (0%)   | 0/19 (0%)   | 0/19 (0%)   | 0/19 (0%)   | 1/19 (5%)     | 0/19 (0%)   |
| <i>Naa10</i> <sup>+/+</sup> | 4           | 1/4 (25%)                 | 0/4 (0%)                  | 0/4 (0%)                  | 1/4 (25%)   | 0/4 (0%)    | 0/4 (0%)    | 0/4 (0%)    | 0/4 (0%)    | 0/4 (0%)    | 0/4 (0%)      | 0/4 (0%)    |
| <i>Naa10</i> <sup>+/-</sup> | 4           | 1/4 (25%)                 | 0/4 (0%)                  | 0/4 (0%)                  | 1/4 (25%)   | 0/4 (0%)    | 0/4 (0%)    | 0/4 (0%)    | 0/4 (0%)    | 0/4 (0%)    | 0/4 (0%)      | 0/4 (0%)    |
| <i>Naa10</i> <sup>-Y</sup>  | 9           | 9/10 (90%)                | 3/9 (33%)                 | 1/9 (11%)                 | 7/10 (70%)  | 2/9 (22%)   | 2/9 (22%)   | 1/9 (11%)   | 0/9 (0%)    | 0/9 (0%)    | 1/9 (11%)     | 0/9 (0%)    |
| <i>Naa10</i> <sup>-/-</sup> | 1           | 1/1 (100%)                | 1/1 (100%)                | 1/1 (100%)                | 1/1 (100%)  | 1/1 (100%)  | 0/1 (0%)    | 0/1 (0%)    | 0/1 (0%)    | 0/1 (0%)    | 0/1 (0%)      | 0/1 (0%)    |

1357

1358



1359 Supplement Table 4. Matings and litter size analyses.

| <i>Naa10</i> KO matings, all WT/WT for <i>Naa12</i> , all >99.6% C57BL/6J     |                                                          |                                                          |                                                          |                                                          |                                                          |                                                          | <i>Naa10</i> x <i>Naa12</i> matings, mixed genetic background                                                    |                                                                                                                  |
|-------------------------------------------------------------------------------|----------------------------------------------------------|----------------------------------------------------------|----------------------------------------------------------|----------------------------------------------------------|----------------------------------------------------------|----------------------------------------------------------|------------------------------------------------------------------------------------------------------------------|------------------------------------------------------------------------------------------------------------------|
| Genotypes of breeders (♀ x ♂)                                                 | <i>Naa10</i> <sup>+/+</sup> x <i>Naa10</i> <sup>+Y</sup> | <i>Naa10</i> <sup>+/+</sup> x <i>Naa10</i> <sup>-Y</sup> | <i>Naa10</i> <sup>+/-</sup> x <i>Naa10</i> <sup>+Y</sup> | <i>Naa10</i> <sup>+/-</sup> x <i>Naa10</i> <sup>-Y</sup> | <i>Naa10</i> <sup>-/-</sup> x <i>Naa10</i> <sup>-Y</sup> | <i>Naa10</i> <sup>-/-</sup> x <i>Naa10</i> <sup>+Y</sup> | <i>Naa10</i> <sup>+/-</sup> <i>Naa12</i> <sup>+/+</sup> x <i>Naa10</i> <sup>+Y</sup> <i>Naa12</i> <sup>+/-</sup> | <i>Naa10</i> <sup>+/-</sup> <i>Naa12</i> <sup>+/+</sup> x <i>Naa10</i> <sup>+Y</sup> <i>Naa12</i> <sup>-/-</sup> |
| #pups                                                                         | 255                                                      | 18                                                       | 330                                                      | 59                                                       | 59                                                       | 127                                                      | 214                                                                                                              | 252                                                                                                              |
| #litters                                                                      | 39                                                       | 2                                                        | 66                                                       | 13                                                       | 11                                                       | 31                                                       | 43                                                                                                               | 64                                                                                                               |
| #pups/<br>#litters, or<br>litter size                                         | 6.5                                                      | 9.0                                                      | 5.0                                                      | 4.5                                                      | 5.4                                                      | 4.1                                                      | 5.0                                                                                                              | 3.9                                                                                                              |
| SD of<br>litter size                                                          | 3.2                                                      | 0.0                                                      | 2.2                                                      | 2.5                                                      | 2.5                                                      | 2.1                                                      | 2.1                                                                                                              | 2.0                                                                                                              |
| % Died in<br>1st three<br>days of<br>life                                     | 5.1%                                                     | 5.6%                                                     | 15.8%                                                    | 13.6%                                                    | 42.4%                                                    | 36.0%                                                    | 16.8%                                                                                                            | 36%                                                                                                              |
| % of total<br>that died<br>by<br>weaning<br>~4 weeks                          | 5.9%                                                     | 11.1%                                                    | 23.0%                                                    | 32.2%                                                    | 59.3%                                                    | 44.0%                                                    | 20.0%                                                                                                            | 42%                                                                                                              |
| Avg<br>Length of<br>Mating till<br>1st<br>Litter:                             | 29                                                       | 22                                                       | 34                                                       | 25                                                       | 35                                                       | 28                                                       | 26                                                                                                               | 34                                                                                                               |
| Total<br>number of<br>unique<br>mating<br>males:                              | 7                                                        | 1                                                        | 12                                                       | 5                                                        | 6                                                        | 7                                                        | 13                                                                                                               | 16                                                                                                               |
| Total<br>number of<br>mating<br>pairs<br>set up:                              | 8                                                        | 1                                                        | >16                                                      | 14                                                       | 10                                                       | 11                                                       | 22                                                                                                               | 17                                                                                                               |
| Total<br>number of<br>mating<br>pairs with<br>progeny                         | 7                                                        | 1                                                        | N/A                                                      | 7                                                        | 4                                                        | 11                                                       | 21                                                                                                               | 15                                                                                                               |
| % females<br>who<br>became<br>pregnant<br>and gave<br>birth at<br>least once: | 87.5%                                                    | 100.0%                                                   | N/A                                                      | 50.0%                                                    | 40.0%                                                    | 100.0%                                                   | 95.5%                                                                                                            | 88.2%                                                                                                            |

1360

1361

1362 **Supplement Table 5 N-termini detected in MEFs, (excel sheet)**

1363 **Supplement Table 6. Genotypes of offspring from *Naa12*<sup>+/-</sup> female mice crossed to the *Naa12*<sup>+/-</sup>**  
 1364 **male mice.**

| Genotype<br>(Expected Mendelian %) | <i>Naa12</i> <sup>+/+</sup><br>(25%) | <i>Naa12</i> <sup>+/-</sup><br>(50%) | <i>Naa12</i> <sup>-/-</sup><br>(25%) |
|------------------------------------|--------------------------------------|--------------------------------------|--------------------------------------|
| Adults (n=117)                     | 26 (22%)                             | 62 (53%)                             | 29 (25%)                             |

1365 Expected and observed Mendelian ratio of genotypes in offspring from crosses.

1366 **Supplement Table 7. Genotypes of offspring from *Naa10*<sup>+/-</sup> *Naa12*<sup>+/+</sup> female mice crossed to the**  
 1367 ***Naa10*<sup>+/-</sup> *Naa12*<sup>+/-</sup> male mice.**

| Genotype<br>(Expected Mendelian %) | <i>Naa10</i> <sup>(+/-)</sup><br><i>Naa12</i> <sup>(+/-)</sup> males<br>(12.5%)   | <i>Naa10</i> <sup>(-/-)</sup><br><i>Naa12</i> <sup>(+/-)</sup> males<br>(12.5%)   | <i>Naa10</i> <sup>(+/-)</sup><br><i>Naa12</i> <sup>(+/+)</sup> males<br>(12.5%)   | <i>Naa10</i> <sup>(-/-)</sup><br><i>Naa12</i> <sup>(+/+)</sup> males<br>(12.5%)   |
|------------------------------------|-----------------------------------------------------------------------------------|-----------------------------------------------------------------------------------|-----------------------------------------------------------------------------------|-----------------------------------------------------------------------------------|
| Newborn pups (n=214)               | 27 (12.6%)                                                                        | 0 (0%)                                                                            | 33 (15.4%)                                                                        | 21 (9.8%)                                                                         |
| Genotype<br>(Expected Mendelian %) | <i>Naa10</i> <sup>(+/-)</sup><br><i>Naa12</i> <sup>(+/+)</sup> females<br>(12.5%) | <i>Naa10</i> <sup>(+/+)</sup><br><i>Naa12</i> <sup>(+/+)</sup> females<br>(12.5%) | <i>Naa10</i> <sup>(+/-)</sup><br><i>Naa12</i> <sup>(+/-)</sup> females<br>(12.5%) | <i>Naa10</i> <sup>(+/+)</sup><br><i>Naa12</i> <sup>(+/-)</sup> females<br>(12.5%) |
|                                    | 31 (14.5%)                                                                        | 33 (15.4%)                                                                        | 9 (4.2%)                                                                          | 41 (19.2%)                                                                        |

Early neonatal death, unable to genotype = 19 (8.9%)

1368 Expected and observed Mendelian ratio of genotypes in offspring from crosses.

1369 **Supplement Table 8. Genotypes of offspring from *Naa10*<sup>+/-</sup> *Naa12*<sup>+/+</sup> female mice crossed to the**  
 1370 ***Naa10*<sup>+/-</sup> *Naa12*<sup>-/-</sup> male mice.**

| Genotype<br>(Expected Mendelian %) | <i>NAA10</i> <sup>+/-</sup> <i>NAA12</i> <sup>+/-</sup><br>male (25%) | <i>NAA10</i> <sup>-/-</sup> <i>NAA12</i> <sup>+/-</sup><br>male (25%) | <i>NAA10</i> <sup>+/+</sup> <i>NAA12</i> <sup>+/-</sup><br>female (25%) | <i>NAA10</i> <sup>+/-</sup> <i>NAA12</i> <sup>+/-</sup><br>female (25%) |
|------------------------------------|-----------------------------------------------------------------------|-----------------------------------------------------------------------|-------------------------------------------------------------------------|-------------------------------------------------------------------------|
| Newborn pups (n=252*)              | 78 (31%)                                                              | 0 (0%)                                                                | 83 (33%)                                                                | 36 (14%)                                                                |

\*Early neonatal death, unable to genotype = 55 (22%)

1371 Expected and observed Mendelian ratio of genotypes in offspring from crosses.

1372

1373 **Supplement Table 9. Mendelian and Observed Offspring Distributions from Naa10(+Y);**  
 1374 **Naa12(+/-) Male and Naa10(+/-); Naa12(+/-) Female Breeding**

| #*                             | Offspring Genotypes      | Mendelian Genotype Distribution (%) |             |              | Observed Number (% Genotyped) |                   |                   |
|--------------------------------|--------------------------|-------------------------------------|-------------|--------------|-------------------------------|-------------------|-------------------|
|                                |                          | F                                   | M           | Total        | E10.5                         | E18.5             | Postnatal         |
| 1                              | Naa10 (+/+), Naa12 (+/+) | 6.25                                |             | 6.25         | 2 (6.9)                       | 5 (15.2)          | 16 (10.2)         |
| 2                              | Naa10 (+/+), Naa12 (+/-) | 12.50                               |             | 12.50        | 4 (13.8)                      | 7 (21.2)          | 28 (17.8)         |
| 3                              | Naa10 (+/+), Naa12 (-/-) | 6.25                                |             | 6.25         | 3 (10.3)                      | 1 (3.0)           | 16 (10.2)         |
| 4                              | Naa10 (+/-), Naa12 (+/+) | 6.25                                |             | 6.25         | 3 (10.3)                      | 1 (3.0)           | 14 (8.9)          |
| 5                              | Naa10 (+/-), Naa12 (+/-) | 12.50                               |             | 12.50        | 6 (20.7)                      | 5 (15.2)          | 5 (3.2)           |
| 6                              | Naa10 (+/-), Naa12 (-/-) | 6.25                                |             | 6.25         | 2 (6.9)                       | 0 (0.0)           | 0 (0.0)           |
| 7                              | Naa10 (+/Y), Naa12 (+/+) |                                     | 6.25        | 6.25         | 1 (3.4)                       | 4 (12.1)          | 17 (10.8)         |
| 8                              | Naa10 (+/Y), Naa12 (+/-) |                                     | 12.50       | 12.50        | 1 (3.4)                       | 5 (15.2)          | 31 (19.7)         |
| 9                              | Naa10 (+/Y), Naa12 (-/-) |                                     | 6.25        | 6.25         | 3 (10.3)                      | 3 (9.1)           | 17 (10.8)         |
| 10                             | Naa10 (-/Y), Naa12 (+/+) |                                     | 6.25        | 6.25         | 0 (0.0)                       | 1 (3.0)           | 17 (8.3)          |
| 11                             | Naa10 (-/Y), Naa12 (+/-) |                                     | 12.50       | 12.50        | 4 (13.8)                      | 1 (3.0)           | 0 (0.0)           |
| 12                             | Naa10 (-/Y), Naa12 (-/-) |                                     | 6.25        | 6.25         | 0 (0.0)                       | 0 (0.0)           | 0 (0.0)           |
| <b>TOTAL (% Genotyped)</b>     |                          | <b>50.0</b>                         | <b>50.0</b> | <b>100.0</b> | <b>29 (99.8)</b>              | <b>33 (100.0)</b> | <b>157 (99.9)</b> |
| <b>Not Genotyped (% Total)</b> |                          |                                     |             |              | <b>3 (9.4)</b>                | <b>23 (41.1)</b>  | <b>0 (0.0)</b>    |
| <b>TOTAL</b>                   |                          | <b>50.0</b>                         | <b>50.0</b> | <b>100.0</b> | <b>32</b>                     | <b>56</b>         | <b>157</b>        |

1375 F = Female; M = Male

1376 \*Genotypes in subsequent tables are numbered according to this table, which includes all possible  
 1377 genotypes from all crosses considered.

1378 **Supplement Table 10. Mendelian and Observed Offspring Distributions from Naa10(+/Y);**  
 1379 **Naa12(-/-) Male and Naa10(+/-); Naa12(+/-) Female Breeding**

| #*                             | Offspring Genotypes      | Mendelian Genotype Distribution (%) |             |              | Observed Number (% Genotyped) |                   |                   |                   |                    |
|--------------------------------|--------------------------|-------------------------------------|-------------|--------------|-------------------------------|-------------------|-------------------|-------------------|--------------------|
|                                |                          | F                                   | M           | Total        | E8.5                          | E10.5             | E12.5             | E18.5             | Postnatal          |
| 2                              | Naa10 (+/+), Naa12 (+/-) | 12.5                                |             | 12.5         | 4 (19.0)                      | 3 (10.7)          | 4 (16.0)          | 2 (18.2)          | 45 (25.1)          |
| 3                              | Naa10 (+/+), Naa12 (-/-) | 12.5                                |             | 12.5         | 6 (28.6)                      | 8 (28.6)          | 1 (4.0)           | 2 (18.2)          | 35 (19.6)          |
| 5                              | Naa10 (+/-), Naa12 (+/-) | 12.5                                |             | 12.5         | 2 (9.5)                       | 8 (28.6)          | 7 (28.0)          | 3 (27.3)          | 12 (6.7)           |
| 6                              | Naa10 (+/-), Naa12 (-/-) | 12.5                                |             | 12.5         | 1 (4.8)                       | 1 (3.6)           | 0 (0.0)           | 0 (0.0)           | 0 (0.0)            |
| 8                              | Naa10 (+/Y), Naa12 (+/-) |                                     | 12.5        | 12.5         | 1 (4.8)                       | 3 (10.7)          | 7 (28.0)          | 0 (0.0)           | 40 (22.3)          |
| 9                              | Naa10 (+/Y), Naa12 (-/-) |                                     | 12.5        | 12.5         | 7 (33.3)                      | 4 (14.3)          | 6 (24.0)          | 4 (36.4)          | 47 (26.3)          |
| 11                             | Naa10 (-/Y), Naa12 (+/-) |                                     | 12.5        | 12.5         | 0 (0.0)                       | 1 (3.6)           | 0 (0.0)           | 0 (0.0)           | 0 (0.0)            |
| 12                             | Naa10 (-/Y), Naa12 (-/-) |                                     | 12.5        | 12.5         | 0 (0.0)                       | 0 (0.0)           | 0 (0.0)           | 0 (0.0)           | 0 (0.0)            |
| <b>TOTAL (% Genotyped)</b>     |                          | <b>50.0</b>                         | <b>50.0</b> | <b>100.0</b> | <b>21 (100.0)</b>             | <b>28 (100.1)</b> | <b>25 (100.0)</b> | <b>11 (100.1)</b> | <b>179 (100.0)</b> |
| <b>Not Genotyped (% Total)</b> |                          |                                     |             |              | <b>4 (16.0)</b>               | <b>12 (30.0)</b>  | <b>19 (43.2)</b>  | <b>7 (38.9)</b>   | <b>2 (1.1)</b>     |
| <b>TOTAL</b>                   |                          | <b>50.0</b>                         | <b>50.0</b> | <b>100.0</b> | <b>25</b>                     | <b>40</b>         | <b>44</b>         | <b>18</b>         | <b>181</b>         |

1380 F = Female; M = Male

1381 \*Genotypes in this table are numbered according to **Supplement Table 9**, which includes all possible  
 1382 genotypes from all crosses considered.

1383 **Supplement Table 11. Mendelian and Observed Postnatal Offspring Distributions from**  
 1384 **Naa10(+Y); Naa12(+/-) Male and Naa10(+/-); Naa12(+/+) Female Breeding**

| #*                             | Offspring Genotypes      | Mendelian Genotype Distribution (%) |             |              | Observed Number (% Genotyped) |               |
|--------------------------------|--------------------------|-------------------------------------|-------------|--------------|-------------------------------|---------------|
|                                |                          | F                                   | M           | Total        | Postnatal                     |               |
| 1                              | Naa10 (+/+), Naa12 (+/+) | 12.5                                |             | 12.5         | 33                            | (16.9)        |
| 2                              | Naa10 (+/+), Naa12 (+/-) | 12.5                                |             | 12.5         | 41                            | (21.0)        |
| 4                              | Naa10 (+/-), Naa12 (+/+) | 12.5                                |             | 12.5         | 31                            | (15.9)        |
| 5                              | Naa10 (+/-), Naa12 (+/-) | 12.5                                |             | 12.5         | 9                             | (4.6)         |
| 7                              | Naa10 (+/Y), Naa12 (+/+) |                                     | 12.5        | 12.5         | 33                            | (16.9)        |
| 8                              | Naa10 (+/Y), Naa12 (+/-) |                                     | 12.5        | 12.5         | 27                            | (13.8)        |
| 10                             | Naa10 (-/Y), Naa12 (+/+) |                                     | 12.5        | 12.5         | 21                            | (10.8)        |
| 11                             | Naa10 (-/Y), Naa12 (+/-) |                                     | 12.5        | 12.5         | 0                             | (0.0)         |
| <b>Total (% Genotyped)</b>     |                          |                                     |             |              | <b>195</b>                    | <b>(99.9)</b> |
| <b>Not Genotyped (% Total)</b> |                          |                                     |             |              | <b>19</b>                     | <b>(8.9)</b>  |
| <b>TOTAL</b>                   |                          | <b>50.0</b>                         | <b>50.0</b> | <b>100.0</b> | <b>214</b>                    |               |

1385 F = Female; M = Male

1386 \*Genotypes in this table are numbered according to **Supplement Table 9**, which includes all possible  
 1387 genotypes from all crosses considered.

1388 **Supplement Table 12. Mendelian and Observed Postnatal Offspring Distributions from**  
 1389 **Naa10(+Y); Naa12(-/-) Male and Naa10(+/-); Naa12(+/+) Female Breeding**

| #*                             | Offspring Genotypes      | Mendelian Genotype Distribution (%) |             |              | Observed Number (% Genotyped) |                |
|--------------------------------|--------------------------|-------------------------------------|-------------|--------------|-------------------------------|----------------|
|                                |                          | F                                   | M           | Total        | Postnatal                     |                |
| 2                              | Naa10 (+/+), Naa12 (+/-) | 25.0                                |             | 25.0         | 83                            | (42.1)         |
| 5                              | Naa10 (+/-), Naa12 (+/-) | 25.0                                |             | 25.0         | 36                            | (18.3)         |
| 8                              | Naa10 (+/Y), Naa12 (+/-) |                                     | 25.0        | 25.0         | 78                            | (39.6)         |
| 11                             | Naa10 (-/Y), Naa12 (+/-) |                                     | 25.0        | 25.0         | 0                             | (0.0)          |
| <b>Total (% Genotyped)</b>     |                          |                                     |             |              | <b>197</b>                    | <b>(100.0)</b> |
| <b>Not Genotyped (% Total)</b> |                          |                                     |             |              | <b>55</b>                     | <b>(21.8)</b>  |
| <b>TOTAL</b>                   |                          | <b>50.0</b>                         | <b>50.0</b> | <b>100.0</b> | <b>252</b>                    |                |

1390 F = Female; M = Male

1391 \*Genotypes in this table are numbered according to **Supplement Table 9**, which includes all possible  
 1392 genotypes from all crosses considered.

1393

1394 **Supplement Table 13. Mendelian and Observed Age-Specific Offspring Distributions from Four**  
 1395 **Crosses**

| #*                         | Offspring Genotypes      | Observed Number at Age (% Genotyped) |                   |                   |                   |                    |
|----------------------------|--------------------------|--------------------------------------|-------------------|-------------------|-------------------|--------------------|
|                            |                          | E8.5                                 | E10.5             | E12.5             | E18.5             | Postnatal          |
| 1                          | Naa10 (+/+), Naa12 (+/+) |                                      | 2 (3.5)           |                   | 5 (11.4)          | 16 (4.8)           |
| 2                          | Naa10 (+/+), Naa12 (+/-) | 4 (19.0)                             | 7 (12.3)          | 4 (16.0)          | 9 (20.5)          | 73 (21.7)          |
| 3                          | Naa10 (+/+), Naa12 (-/-) | 6 (28.6)                             | 11 (19.3)         | 1 (4.0)           | 3 (6.8)           | 51 (15.2)          |
| 4                          | Naa10 (+/-), Naa12 (+/+) |                                      | 3 (5.3)           |                   | 1 (2.3)           | 14 (4.2)           |
| 5                          | Naa10 (+/-), Naa12 (+/-) | 2 (9.5)                              | 14 (24.6)         | 7 (28.0)          | 8 (18.2)          | 17 (5.1)           |
| 6                          | Naa10 (+/-), Naa12 (-/-) | 1 (4.8)                              | 3 (5.3)           | 0 (0.0)           | 0 (0.0)           | 0 (0.0)            |
| 7                          | Naa10 (+/Y), Naa12 (+/+) |                                      | 1 (1.8)           |                   | 4 (9.1)           | 17 (5.1)           |
| 8                          | Naa10 (+/Y), Naa12 (+/-) | 1 (4.8)                              | 4 (7.0)           | 7 (28.0)          | 5 (11.4)          | 71 (21.1)          |
| 9                          | Naa10 (+/Y), Naa12 (-/-) | 7 (33.3)                             | 7 (12.3)          | 6 (24.0)          | 7 (15.9)          | 64 (19.0)          |
| 10                         | Naa10 (-/Y), Naa12 (+/+) |                                      | 0 (0.0)           |                   | 1 (2.3)           | 13 (3.9)           |
| 11                         | Naa10 (-/Y), Naa12 (+/-) | 0 (0.0)                              | 5 (8.8)           | 0 (0.0)           | 1 (2.3)           | 0 (0.0)            |
| 12                         | Naa10 (-/Y), Naa12 (-/-) | 0 (0.0)                              | 0 (0.0)           | 0 (0.0)           | 0 (0.0)           | 0 (0.0)            |
| <b>TOTAL (% Genotyped)</b> |                          | <b>21 (100.0)</b>                    | <b>57 (100.2)</b> | <b>25 (100.0)</b> | <b>44 (100.2)</b> | <b>336 (100.0)</b> |

1396 F = Female; M = Male

1397 \*Genotypes in this table are numbered according to **Supplement Table 9**, which includes all possible  
 1398 genotypes from all crosses considered.

1399 **Supplement Table 14. Mendelian and Observed Cumulative Offspring Distributions from All**  
 1400 **Four Crosses**

| #*                         | Offspring Genotypes      | Cumulative Observed Number (% Genotyped) |                  |                    |                    |                   |
|----------------------------|--------------------------|------------------------------------------|------------------|--------------------|--------------------|-------------------|
|                            |                          | E8.5                                     | E10.5            | E12.5              | E18.5              | Postnatal         |
| 1                          | Naa10 (+/+), Naa12 (+/+) |                                          | 2 (2.6)          | 2 (1.9)            | 7 (4.8)            | 23 (4.8)          |
| 2                          | Naa10 (+/+), Naa12 (+/-) | 4 (19.0)                                 | 11 (14.1)        | 15 (14.6)          | 24 (16.3)          | 97 (20.1)         |
| 3                          | Naa10 (+/+), Naa12 (-/-) | 6 (28.6)                                 | 17 (21.8)        | 18 (17.5)          | 21 (14.3)          | 72 (14.9)         |
| 4                          | Naa10 (+/-), Naa12 (+/+) |                                          | 3 (3.8)          | 3 (2.9)            | 4 (2.7)            | 18 (3.7)          |
| 5                          | Naa10 (+/-), Naa12 (+/-) | 2 (9.5)                                  | 16 (20.5)        | 23 (22.3)          | 31 (21.1)          | 48 (9.9)          |
| 6                          | Naa10 (+/-), Naa12 (-/-) | 1 (4.8)                                  | 4 (5.1)          | 4 (3.9)            | 4 (2.7)            | 4 (0.8)           |
| 7                          | Naa10 (+/Y), Naa12 (+/+) |                                          | 1 (1.3)          | 1 (1.0)            | 5 (3.4)            | 22 (4.6)          |
| 8                          | Naa10 (+/Y), Naa12 (+/-) | 1 (4.8)                                  | 5 (6.4)          | 12 (11.7)          | 17 (11.6)          | 88 (18.2)         |
| 9                          | Naa10 (+/Y), Naa12 (-/-) | 7 (33.3)                                 | 14 (17.9)        | 20 (19.4)          | 21 (18.4)          | 91 (18.8)         |
| 10                         | Naa10 (-/Y), Naa12 (+/+) |                                          | 0 (0.0)          | 0 (0.0)            | 1 (0.7)            | 14 (2.9)          |
| 11                         | Naa10 (-/Y), Naa12 (+/-) | 0 (0.0)                                  | 5 (6.4)          | 5 (4.9)            | 6 (4.1)            | 6 (1.2)           |
| 12                         | Naa10 (-/Y), Naa12 (-/-) | 0 (0.0)                                  | 0 (0.0)          | 0 (0.0)            | 0 (0.0)            | 0 (0.0)           |
| <b>TOTAL (% Genotyped)</b> |                          | <b>21 (100.0)</b>                        | <b>78 (99.9)</b> | <b>103 (100.0)</b> | <b>147 (100.2)</b> | <b>483 (99.9)</b> |

1401 F = Female; M = Male

1402 \*Genotypes in this table are numbered according to **Supplement Table 9**, which includes all possible  
 1403 genotypes from all crosses considered.

1404

1405 **Supplement Table 15. Mice analyzed by weighing, according to genotype.**

| <b>Females</b>      |                                                      |                 |                     |              |              |              |
|---------------------|------------------------------------------------------|-----------------|---------------------|--------------|--------------|--------------|
|                     |                                                      |                 | <b>Naa12 status</b> |              |              |              |
|                     |                                                      |                 | <b>WT/WT</b>        | <b>WT/KO</b> | <b>KO/KO</b> | <b>Total</b> |
| <b>Naa10 status</b> | <b>Pure C57BL/6J background Naa10 mice</b>           | <b>WT/WT</b>    | <b>67</b>           | <b>N/A</b>   | <b>N/A</b>   | <b>67</b>    |
|                     |                                                      | <b>WT/KO</b>    | <b>125</b>          | <b>N/A</b>   | <b>N/A</b>   | <b>125</b>   |
|                     |                                                      | <b>KO/KO</b>    | <b>15</b>           | <b>N/A</b>   | <b>N/A</b>   | <b>15</b>    |
|                     |                                                      | <b>Subtotal</b> | <b>207</b>          | <b>N/A</b>   | <b>N/A</b>   | <b>207</b>   |
|                     | <b>mixed genetic background Naa10 and Naa12 mice</b> | <b>WT/WT</b>    | <b>32</b>           | <b>82</b>    | <b>10</b>    | <b>124</b>   |
|                     |                                                      | <b>WT/KO</b>    | <b>35</b>           | <b>23</b>    | <b>0</b>     | <b>58</b>    |
|                     |                                                      | <b>KO/KO</b>    | <b>0</b>            | <b>0</b>     | <b>0</b>     | <b>0</b>     |
|                     |                                                      | <b>Subtotal</b> | <b>67</b>           | <b>105</b>   | <b>10</b>    | <b>182</b>   |
| <b>Total</b>        |                                                      | <b>274</b>      | <b>105</b>          | <b>10</b>    | <b>389</b>   |              |

1406

| <b>Males</b>        |                                                      |                 |                     |              |              |              |
|---------------------|------------------------------------------------------|-----------------|---------------------|--------------|--------------|--------------|
|                     |                                                      |                 | <b>Naa12 status</b> |              |              |              |
|                     |                                                      |                 | <b>WT/WT</b>        | <b>WT/KO</b> | <b>KO/KO</b> | <b>Total</b> |
| <b>Naa10 status</b> | <b>Pure C57BL/6J background Naa10 mice</b>           | <b>WT</b>       | <b>97</b>           | <b>N/A</b>   | <b>N/A</b>   | <b>97</b>    |
|                     |                                                      | <b>KO</b>       | <b>70</b>           | <b>N/A</b>   | <b>N/A</b>   | <b>70</b>    |
|                     |                                                      | <b>Subtotal</b> | <b>167</b>          | <b>N/A</b>   | <b>N/A</b>   | <b>167</b>   |
|                     | <b>mixed genetic background Naa10 and Naa12 mice</b> | <b>WT</b>       | <b>44</b>           | <b>63</b>    | <b>11</b>    | <b>118</b>   |
|                     |                                                      | <b>KO</b>       | <b>14</b>           | <b>0</b>     | <b>0</b>     | <b>14</b>    |
|                     |                                                      | <b>Subtotal</b> | <b>58</b>           | <b>63</b>    | <b>11</b>    | <b>132</b>   |
|                     | <b>Total</b>                                         |                 | <b>225</b>          | <b>63</b>    | <b>11</b>    | <b>299</b>   |

1407

1408

1409 Supplement Table 16. Effects of *Naa10* KO on growth rate of *Naa10* mice on pure genetic  
1410 background.

|                                  | C57BL/6J inbred females (N = 207)  |         |        |         |                           |       |       |         |                                   |         |        |         |                                                 |         |        |         |
|----------------------------------|------------------------------------|---------|--------|---------|---------------------------|-------|-------|---------|-----------------------------------|---------|--------|---------|-------------------------------------------------|---------|--------|---------|
|                                  | Effect of age and age <sup>2</sup> |         |        |         | Effect of <i>Naa10</i> KO |       |       |         | Effect of age and <i>Naa10</i> KO |         |        |         | Effect of age, <i>Naa10</i> KO, and interaction |         |        |         |
|                                  | Coeff.                             | SE      | z      | p >  z  | Coeff.                    | SE    | z     | p >  z  | Coeff.                            | SE      | z      | p >  z  | Coeff.                                          | SE      | z      | p >  z  |
| Age in days                      | 0.349                              | 0.006   | 59.49  | < 0.001 |                           |       |       |         | 0.349                             | 0.006   | 59.38  | < 0.001 | 0.344                                           | 0.010   | 34.59  | < 0.001 |
| Age <sup>2</sup>                 | -0.001                             | 0.00003 | -40.59 | < 0.001 |                           |       |       |         | -0.001                            | 0.00003 | -40.56 | < 0.001 | -0.001                                          | 0.00005 | -24.53 | < 0.001 |
| <i>Naa10</i> KO                  |                                    |         |        |         | -2.92                     | 0.847 | -3.45 | 0.001   | -0.252                            | 0.248   | -1.01  | ns      | -0.219                                          | 0.451   | -0.49  | ns      |
| Age x KO                         |                                    |         |        |         |                           |       |       |         |                                   |         |        |         | 0.009                                           | 0.012   | 0.75   | ns      |
| Age <sup>2</sup> x KO            |                                    |         |        |         |                           |       |       |         |                                   |         |        |         | 0.00009                                         | 0.00007 | -1.27  | ns      |
| (constant)                       | 2.518                              | 0.204   | 12.35  | < 0.001 | 17.23                     | 0.690 | 24.96 | < 0.001 | 2.697                             | 0.272   | 9.93   | < 0.001 | 2.633                                           | 0.382   | 6.90   | < 0.001 |
| Wald X <sup>2</sup> <sup>a</sup> | 6547.29, p < 0.0001                |         |        |         | 11.93, p = 0.0006         |       |       |         | 6552.24, p < 0.0001               |         |        |         | 6611.63, p < 0.0001                             |         |        |         |

1411

|                                  | C57BL/6J inbred males (N = 167)    |         |        |         |                           |       |       |         |                                   |         |        |         |                                                 |         |        |         |
|----------------------------------|------------------------------------|---------|--------|---------|---------------------------|-------|-------|---------|-----------------------------------|---------|--------|---------|-------------------------------------------------|---------|--------|---------|
|                                  | Effect of age and age <sup>2</sup> |         |        |         | Effect of <i>Naa10</i> KO |       |       |         | Effect of age and <i>Naa10</i> KO |         |        |         | Effect of age, <i>Naa10</i> KO, and interaction |         |        |         |
|                                  | Coeff.                             | SE      | z      | p >  z  | Coeff.                    | SE    | z     | p >  z  | Coeff.                            | SE      | z      | p >  z  | Coeff.                                          | SE      | z      | p >  z  |
| Age in days                      | 0.454                              | 0.008   | 60.16  | < 0.001 |                           |       |       |         | 0.454                             | 0.007   | 62.20  | < 0.001 | 0.467                                           | 0.009   | 51.68  | < 0.001 |
| Age <sup>2</sup>                 | -0.002                             | 0.00005 | -39.76 | < 0.001 |                           |       |       |         | -0.002                            | 0.00004 | -41.16 | < 0.001 | -0.002                                          | 0.00005 | -34.53 | < 0.001 |
| <i>Naa10</i> KO                  |                                    |         |        |         | -4.721                    | 1.040 | -4.54 | < 0.001 | -2.578                            | 0.304   | -8.47  | < 0.001 | -1.351                                          | 0.504   | -2.68  | 0.007   |
| Age x KO                         |                                    |         |        |         |                           |       |       |         |                                   |         |        |         | -0.035                                          | 0.015   | -2.32  | 0.020   |
| Age <sup>2</sup> x KO            |                                    |         |        |         |                           |       |       |         |                                   |         |        |         | 0.0001                                          | 0.00009 | 1.46   | ns      |
| (constant)                       | 1.303                              | 0.271   | 4.81   | < 0.001 | 19.56                     | 0.668 | 29.28 | < 0.001 | 2.430                             | 0.283   | 8.58   | < 0.001 | 1.931                                           | 0.321   | 6.01   | < 0.001 |
| Wald X <sup>2</sup> <sup>a</sup> | 7220.56, p < 0.0001                |         |        |         | 20.60, p < 0.0001         |       |       |         | 8007.09, p < 0.0001               |         |        |         | 8185.75, p < 0.0001                             |         |        |         |

1412 <sup>a</sup> The Wald X<sup>2</sup> is a measure of the overall goodness of fit of the complete model.

1413

1414 Supplement Table 17. Effects of *Naa10* and *Naa12* Kos on growth rate on mixed genetic  
 1415 background

|                                  | females (N = 182): effects of age and knockouts on weight |        |        |         |                                    |        |        |         |                                    |        |        |         |                                                 |        |        |         |                                                      |        |        |         |
|----------------------------------|-----------------------------------------------------------|--------|--------|---------|------------------------------------|--------|--------|---------|------------------------------------|--------|--------|---------|-------------------------------------------------|--------|--------|---------|------------------------------------------------------|--------|--------|---------|
|                                  | Effect of age and age <sup>2</sup>                        |        |        |         | Effects of age and <i>Naa10</i> KO |        |        |         | Effects of age and <i>Naa12</i> KO |        |        |         | Effects of age, <i>Naa10</i> & <i>Naa12</i> Kos |        |        |         | Effects: age, <i>Naa10</i> , <i>Naa12</i> , both Kos |        |        |         |
|                                  | Coeff                                                     | SE     | z      | p >  z  | Coeff                              | SE     | z      | p >  z  | Coeff                              | SE     | z      | p >  z  | Coeff                                           | SE     | z      | p >  z  | Coeff                                                | SE     | z      | p >  z  |
| Age                              | .                                                         | 0.011  | 43.10  | < 0.001 | 0.489                              | 0.011  | 45.02  | < 0.001 | 0.489                              | 0.011  | 43.25  | < 0.001 | 0.491                                           | 0.011  | 46.16  | < 0.001 | 0.492                                                | 0.011  | 46.49  | < 0.001 |
| Age <sup>2</sup>                 | -0.003                                                    | 0.0001 | -24.47 | < 0.001 | -0.003                             | 0.0001 | -25.58 | < 0.001 | -0.003                             | 0.0001 | -24.55 | < 0.001 | -0.003                                          | 0.0001 | -26.21 | < 0.001 | -0.003                                               | 0.0001 | -26.45 | < 0.001 |
| <i>Naa10</i>                     |                                                           |        |        |         | -1.117                             | 0.254  | -4.40  | < 0.001 |                                    |        |        |         | -1.424                                          | 0.267  | -5.33  | < 0.001 | -0.368                                               | 0.335  | -1.10  | ns      |
| <i>Naa12</i> -Het                |                                                           |        |        |         |                                    |        |        |         | -0.377                             | 0.247  | -1.53  | ns      | -0.789                                          | 0.255  | -3.09  | 0.002   | 0.039                                                | 0.287  | 0.14   | ns      |
| <i>Naa12</i> -Ho                 |                                                           |        |        |         |                                    |        |        |         | -0.659                             | 0.625  | -1.05  | ns      | -1.376                                          | 0.621  | -2.21  | 0.027   |                                                      |        |        |         |
| <i>Naa10</i> - <i>Naa12</i> -Het |                                                           |        |        |         |                                    |        |        |         |                                    |        |        |         |                                                 |        |        |         | -2.143                                               | 0.510  | -4.20  | < 0.001 |
| (constant)                       | 0.616                                                     | 0.264  | 2.33   | 0.020   | 0.966                              | 0.267  | 3.61   | < 0.001 | 0.825                              | 0.291  | 2.83   | 0.005   | 1.508                                           | 0.307  | 4.91   | < 0.001 | 0.879                                                | 0.307  | 2.86   | 0.004   |
| Wald X <sup>2</sup> a            | 4692.14, p < 0.0001                                       |        |        |         | 5116.03, p < 0.0001                |        |        |         | 4752.14, p < 0.0001                |        |        |         | 5396.11, p < 0.0001                             |        |        |         | 5461.46, p < 0.0001                                  |        |        |         |

1416

|                                                     | females (N = 182): effects of age and knockouts on growth rate |        |        |         |                                                       |        |        |         |                                                 |        |        |         |                                                |        |        |         |
|-----------------------------------------------------|----------------------------------------------------------------|--------|--------|---------|-------------------------------------------------------|--------|--------|---------|-------------------------------------------------|--------|--------|---------|------------------------------------------------|--------|--------|---------|
|                                                     | Effects of age, <i>Naa10</i> KO, interaction with age          |        |        |         | Effects of age, <i>Naa12</i> KO, interaction with age |        |        |         | Effects of age, both Kos & interaction with age |        |        |         | Effects: age, Kos & interaction with ea. Other |        |        |         |
|                                                     | Coeff                                                          | SE     | z      | p >  z  | Coeff                                                 | SE     | z      | p >  z  | Coeff                                           | SE     | z      | p >  z  | Coeff                                          | SE     | z      | p >  z  |
| Age                                                 | 0.508                                                          | 0.013  | 39.24  | < 0.001 | 0.491                                                 | 0.015  | 32.64  | < 0.001 | 0.523                                           | 0.018  | 29.09  | < 0.001 | 0.496                                          | 0.011  | 46.35  | < 0.001 |
| Age <sup>2</sup>                                    | -0.003                                                         | 0.0001 | -22.76 | < 0.001 | -0.003                                                | 0.0002 | -17.97 | < 0.001 | -0.003                                          | 0.0002 | -16.71 | < 0.001 | -0.003                                         | 0.0001 | -26.24 | < 0.001 |
| <i>Naa10</i>                                        | 0.109                                                          | 0.547  | 0.20   | ns      |                                                       |        |        |         | 0.030                                           | 0.582  | 0.05   | ns      | -0.364                                         | 0.336  | -1.08  | ns      |
| Age x <i>Naa10</i>                                  | -0.059                                                         | 0.023  | -2.51  | 0.012   |                                                       |        |        |         | -0.068                                          | 0.025  | -2.76  | 0.006   |                                                |        |        |         |
| Age <sup>2</sup> x <i>Naa10</i>                     | 0.0006                                                         | 0.0002 | 2.25   | 0.024   |                                                       |        |        |         | 0.0006                                          | 0.0003 | 2.46   | 0.014   |                                                |        |        |         |
| <i>Naa12</i> -Het                                   |                                                                |        |        |         | -0.175                                                | 0.547  | -0.32  | ns      | -0.099                                          | 0.557  | -0.18  | ns      | 0.036                                          | 0.288  | 0.13   | ns      |
| Age x <i>Naa12</i> -Het                             |                                                                |        |        |         | -0.005                                                | 0.023  | -0.23  | ns      | -0.029                                          | 0.023  | -1.23  | ns      |                                                |        |        |         |
| Age <sup>2</sup> x <i>Naa12</i> -Het                |                                                                |        |        |         | 0.000004                                              | 0.0002 | 0.02   | ns      | 0.0002                                          | 0.0002 | 0.97   | ns      |                                                |        |        |         |
| <i>Naa12</i> -Ho                                    |                                                                |        |        |         | -0.882                                                | 1.584  | -0.56  | ns      | -0.916                                          | 1.551  | -0.59  | ns      |                                                |        |        |         |
| Age x <i>Naa12</i> -Ho                              |                                                                |        |        |         | 0.003                                                 | 0.073  | 0.04   | ns      | -0.029                                          | 0.071  | -0.41  | ns      |                                                |        |        |         |
| Age <sup>2</sup> x <i>Naa12</i> -Ho                 |                                                                |        |        |         | 0.00003                                               | 0.0007 | 0.04   | ns      | 0.0003                                          | 0.001  | 0.47   | ns      |                                                |        |        |         |
| <i>Naa10</i> - <i>Naa12</i> -Het                    |                                                                |        |        |         |                                                       |        |        |         |                                                 |        |        |         | 0.784                                          | 1.303  | 0.60   | ns      |
| Age x <i>Naa10</i> - <i>Naa12</i> -Het              |                                                                |        |        |         |                                                       |        |        |         |                                                 |        |        |         | -0.113                                         | 0.052  | -2.15  | 0.031   |
| Age <sup>2</sup> x <i>Naa10</i> - <i>Naa12</i> -Het |                                                                |        |        |         |                                                       |        |        |         |                                                 |        |        |         | 0.0009                                         | 0.0005 | 1.73   | ns      |
| (constant)                                          | 0.588                                                          | 0.305  | 1.93   | ns      | 0.756                                                 | 0.348  | 2.17   | 0.030   | 0.790                                           | 0.426  | 1.85   | ns      | 0.774                                          | 0.309  | 2.50   | 0.012   |
| Wald X <sup>2</sup> a                               | 5224.04, p < 0.0001                                            |        |        |         | 4758.89, p < 0.0001                                   |        |        |         | 5526.71, p < 0.0001                             |        |        |         | 5586.86, p < 0.0001                            |        |        |         |

1417 Het : heterozygous

1418 Ho : homozygous

1419 <sup>a</sup> The Wald X<sup>2</sup> is a measure of the overall goodness of fit of the complete model.

1420



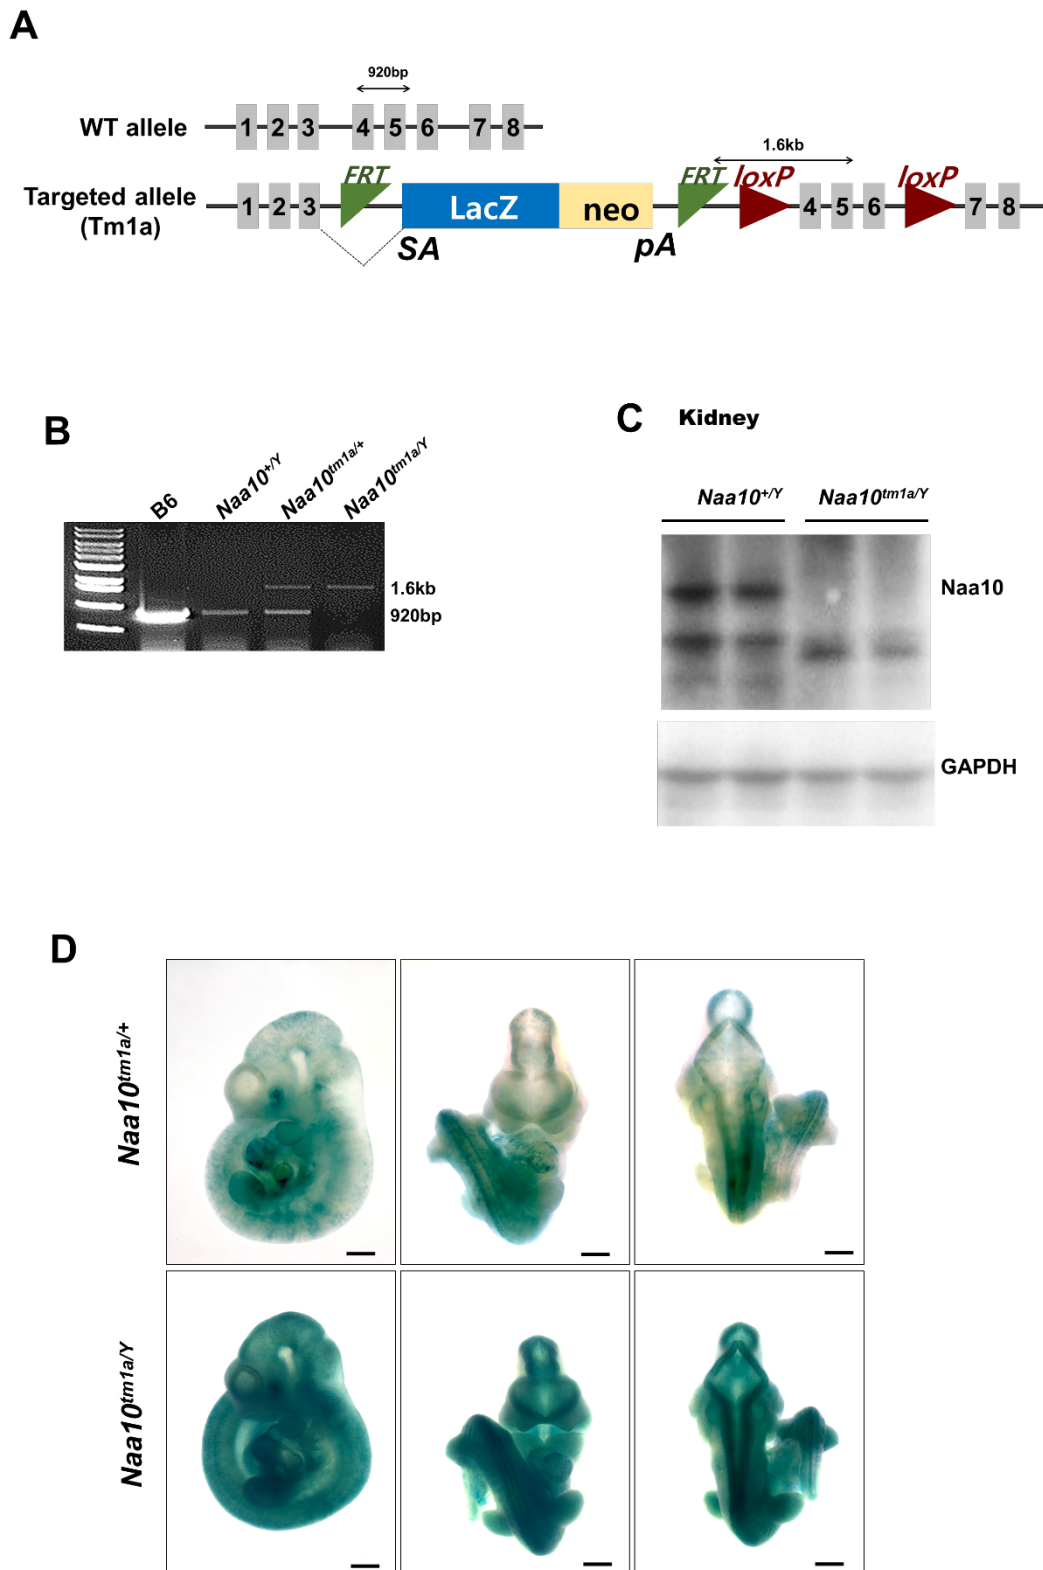

**Supplement Fig. 1. Generation and confirmation of *Naa10tm1a* mice.** (A) Schematic illustration of the *Naa10tm1a* mice. (B) PCR confirmation of *Naa10* deficiency. (C) Confirmation of *Naa10* protein in kidney tissue by Western blot. *Naa10* protein is not detected in *Naa10*<sup>-Y</sup> mouse. (D) Expression pattern of *Naa10* in the embryo.  $\beta$ -gal staining represents *Naa10* localization.

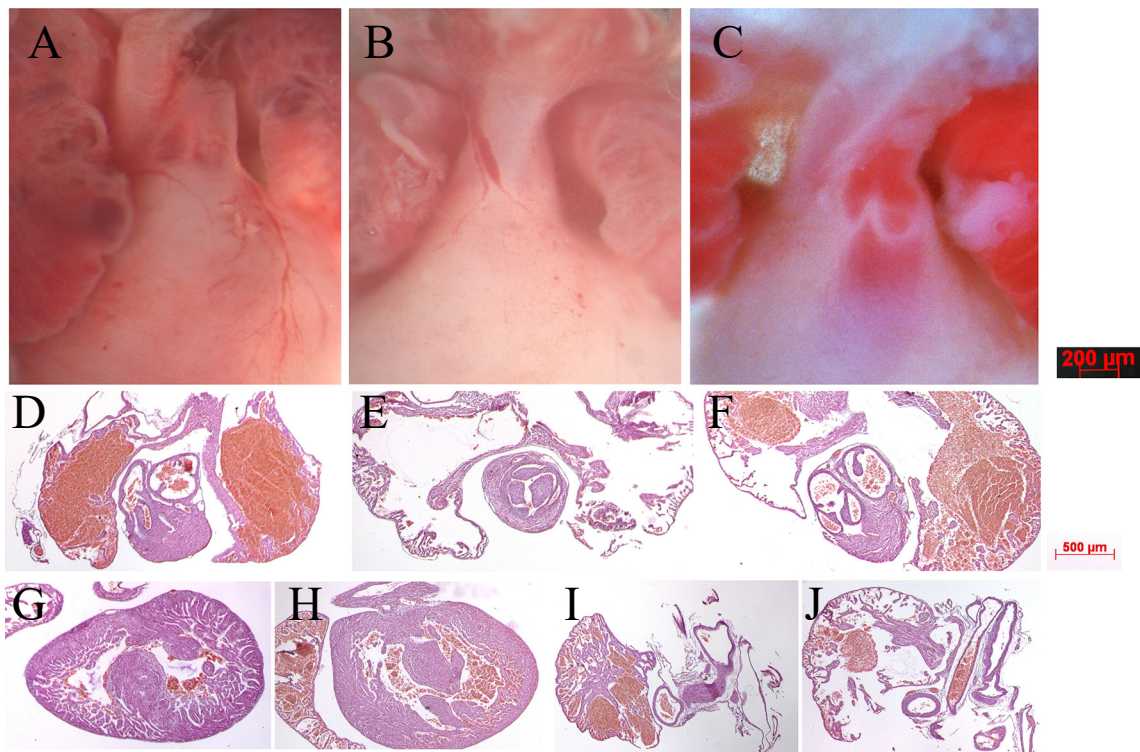

**Supplement Fig. 2. Gross anatomy and histology of neonatal mouse hearts.** (A) Wildtype male heart outflow tract region indicating separate aorta and pulmonary trunks nestled between left and right atria. (B) *Naa10*<sup>-/-</sup> female heart from dying P0 pup only has a single outflow tract emerging from the right ventricle, resulting in persistent truncus arteriosus. (C) *Naa10*<sup>-/-y</sup> male heart from dying P0 pup has separate outflow tracts but both emerge from the right ventricle, resulting in double outlet right ventricle. (D) normal histology from wildtype male heart of pulmonary artery exiting the right ventricle. (E) histology from *Naa10*<sup>-/-</sup> heart of single outflow tract exiting the right ventricle with tricuspid valve leaflets. (F) histology from *Naa10*<sup>-/-y</sup> heart of both pulmonary and aortic arteries emerging from right ventricle within the same plane. (G) *Naa10*<sup>-/-</sup> histology showing membranous VSD, (H) *Naa10*<sup>-/-y</sup> histology showing muscular VSD. (I) normal heart revealing closed ductus arteriosus, (J) *Naa10*<sup>-/-</sup> histology showing open ductus arteriosus leading to pulmonary overload and likely lethality.

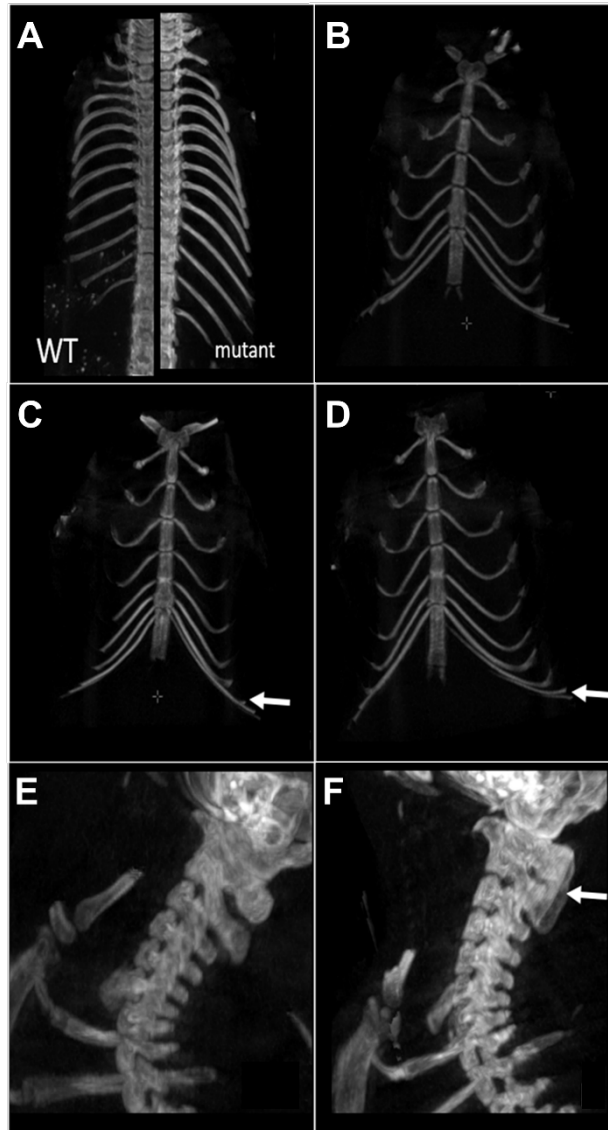

**Supplement Fig. 3. Skeletal phenotype by CT scanning.** (A) In WT mice 13 thoracic vertebrae and ribs are numbered whereas 14 thoracic vertebrae and ribs are counted in mutants (*Naa10<sup>-Y</sup>*) (WT on the left, mutant on the right). n=11 CT scans for *Naa10<sup>-Y</sup>* compared to n=18 *Naa10<sup>+Y</sup>*. (B-D) Different number of ribs are linking the sternum between in *Naa10<sup>-Y</sup>*, *Naa10<sup>-/-</sup>* and WT. (B) 7 ribs linking the sternum in WT. (C) 8 ribs linking the sternum (the white arrow shows the 8th rib) in *Naa10<sup>-Y</sup>*. (D) 7 on one side + 7 and one almost linking on the other side. In 2 mice, an asymmetrical link was observed. White arrow shows the eighth asymmetrical rib. (E and F) Abnormalities in the cervical phenotype. (E) Cervical WT/ morphology. (F) Partial fusion of C1 and C2 dorsal arch in one mutant mouse.

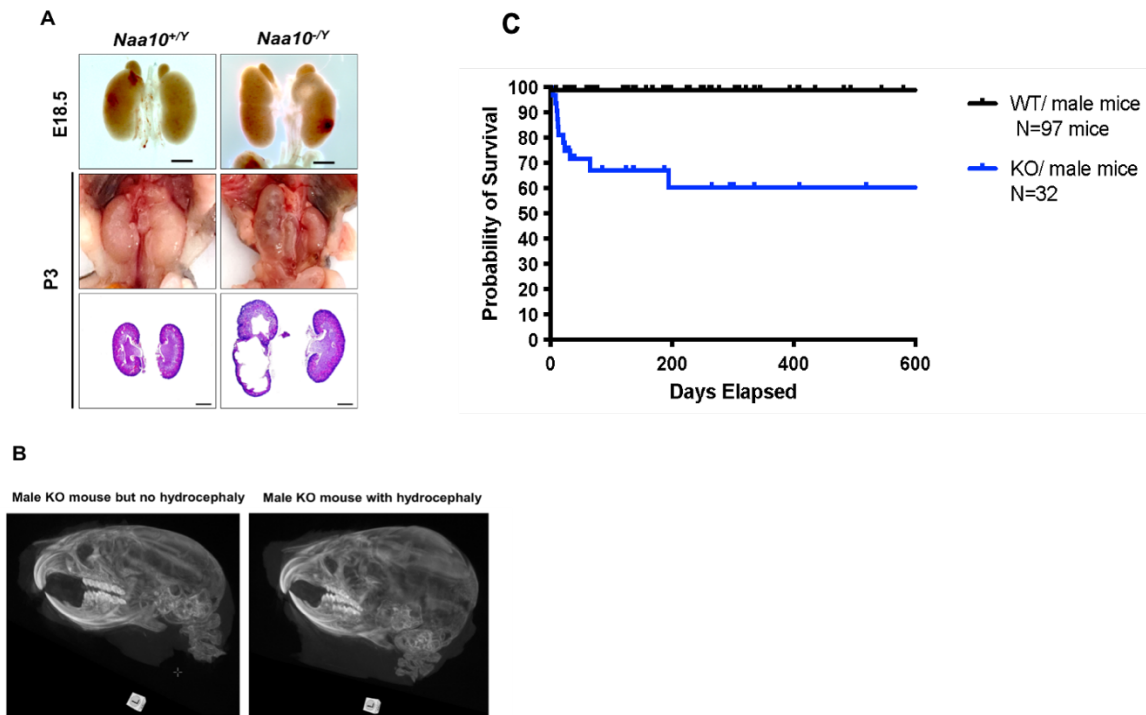

**Supplement Fig. 4. Hydronephrosis and Hydrocephaly in *Naa10* KO mice.** (A) Representative images and histology of renal defects at E18.5 (n=6 out of 39 examined) and P3 (n= 4 out of 11 examined). (B) Hydrocephaly (n=3 CT scans for *Naa10*<sup>-Y</sup> mice with hydrocephaly compared to n=3 *Naa10*<sup>-Y</sup> mice without hydrocephaly). (C) Kaplan-Meier survival curve of the *Naa10*<sup>+Y</sup> and *Naa10*<sup>-Y</sup> male mice starting at 4 days of life, thus not including any mice that died in the first 3 days of life.

1423

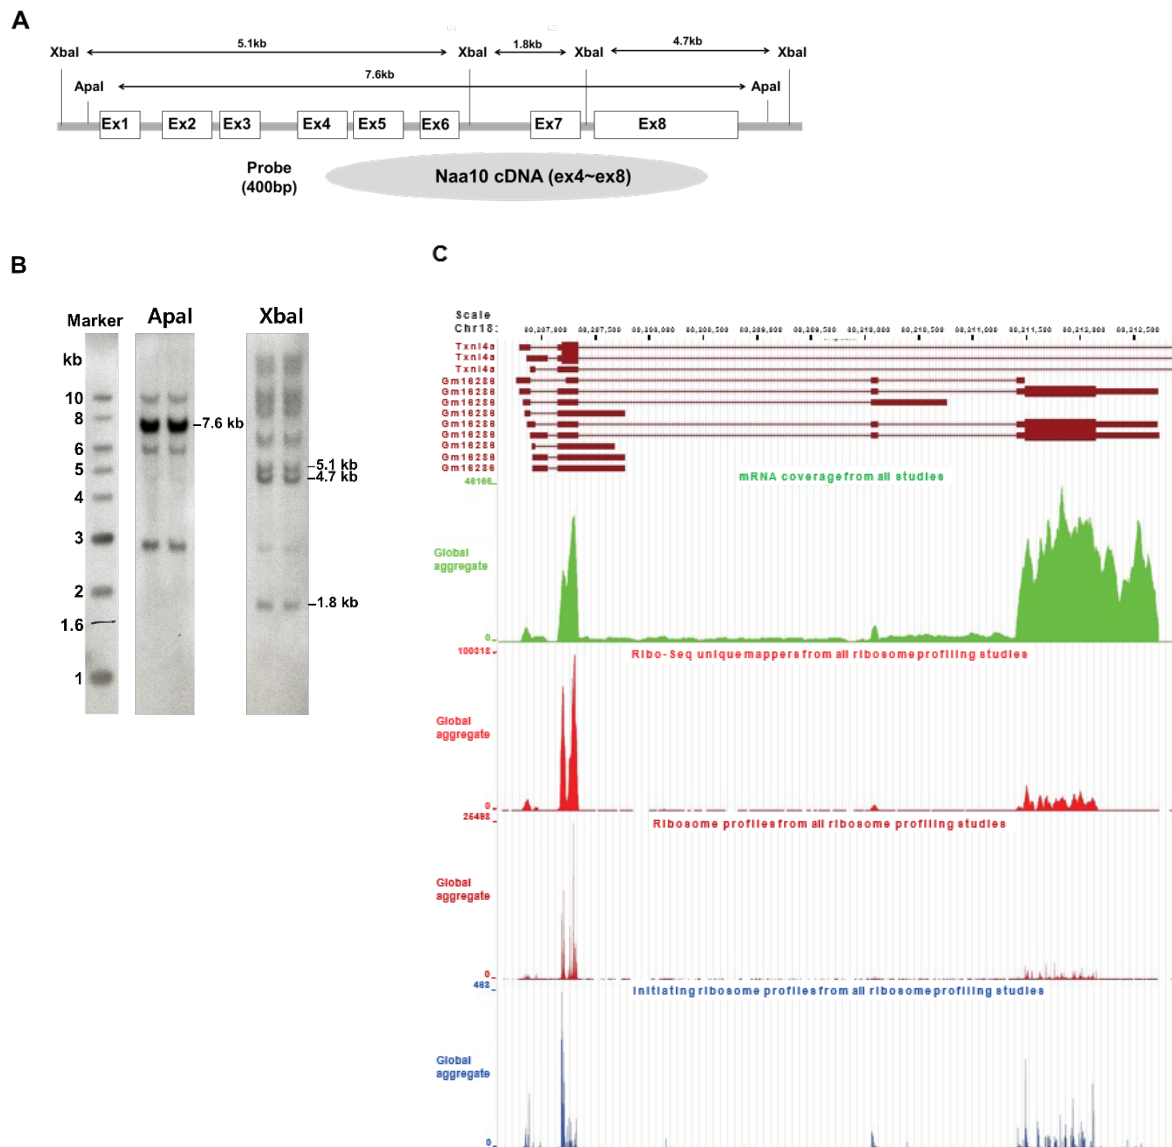

**Supplement Fig. 5. Identification of a potential *Naa10* homolog.** (A) Construction of *Naa10* Southern blot probe. (B) Southern blot membrane after hybridization with a *Naa10* probe. Expected size band, restricted with *Apa* I and *Xba* I, were showed. (C) Ribosome profiling traces for the potential *Naa10* paralog (Gm16286, UniProt: Q9CQX6). Picture was modified from GWIPS genome browser, Chr 18, 80206601-80212942.

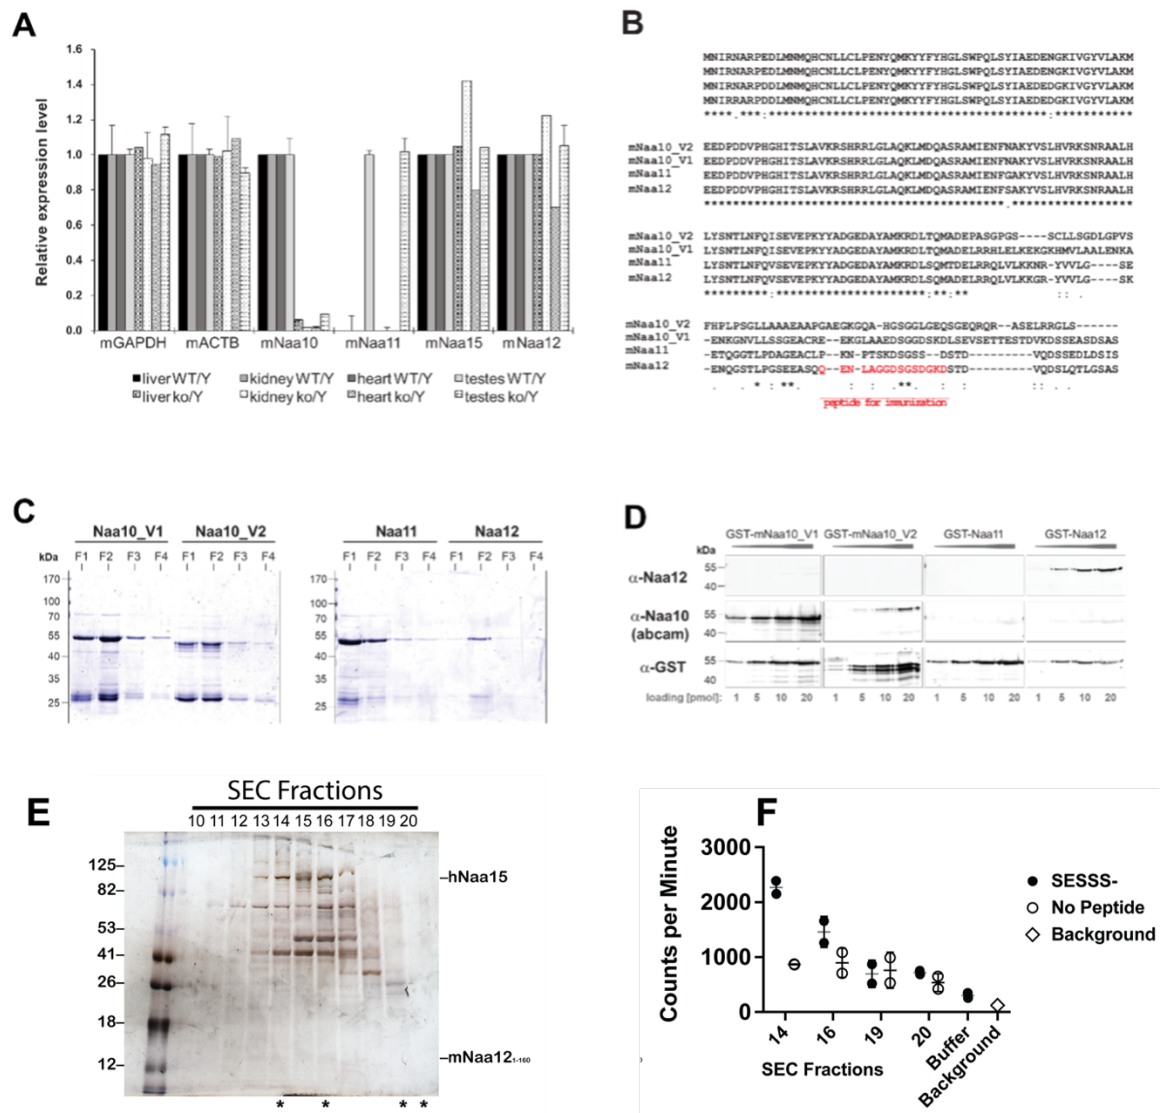

**Supplement Fig. 6. Characterization of a potential Naa10 homolog.** (A) qPCR analyses of mouse NATs (mNATs) in *Naa10* WT and KO adult mouse tissue. (B) Sequence alignment of mNaa10 isoforms and paralogs, including the potential Naa10 paralog mNaa12 (Gm16286, UniProt: Q9CQX6) using Clustal Omega (EMBL-EBI). The peptide used for immunization of rabbits to generate a specific antibody is indicated in red. (C) Full length mNAT cDNA from mouse was amplified and cloned into pGEX-4T1. Proteins were expressed in *E. coli* BL21 (DE3) and purified via GSH-Sepharose. Shown is a Coomassie stain of fraction 1-4. (D) Cross-reactivity and sensitivity of the used NAT antibodies. 1-20 pmol of GST-mNAT proteins were separated on SDS-PAGE followed by western blot, probed with the indicated antibodies. (E) Recombinant mouse Naa12/human Naa15 chimera complex. Silver-stained denaturing SDS-PAGE (left) containing fractions (#10-20) eluted from an S200 size-exclusion (SEC) chromatography column with fractions evaluated for NatA-type activity indicated (asterisks, below gel) with (F) corresponding radioactive acetyltransferase activity assay comparing the activity of indicated fractions and buffer control (chemical acetylation) towards the SESSS- peptide (filled circles), in the absence of peptide (open circles), and assay background (x). Error bars represent SD of two technical replicates.

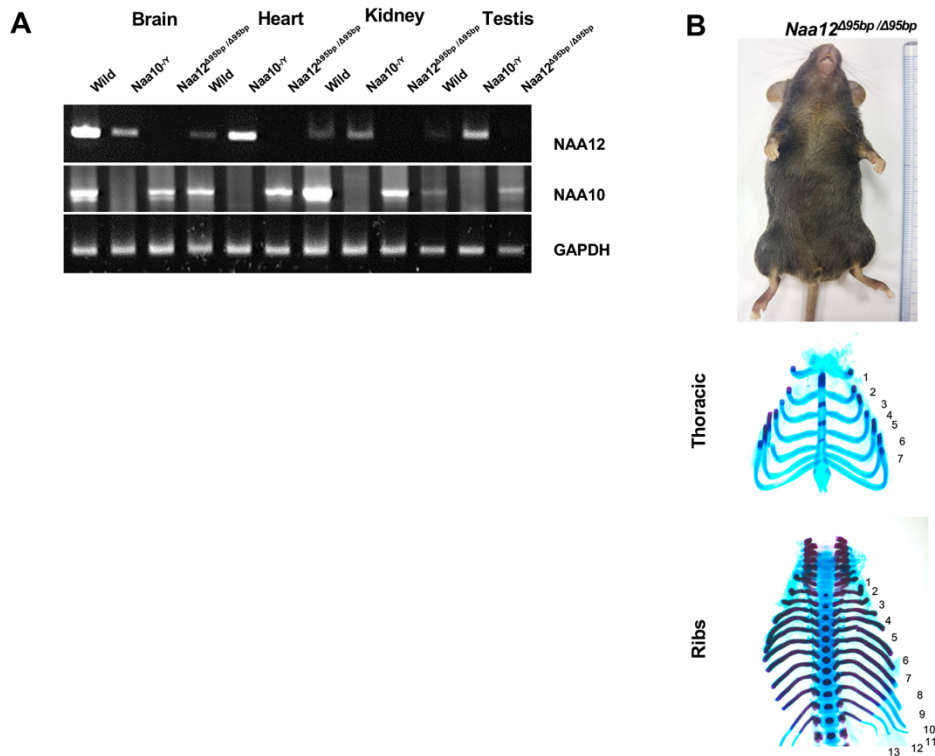

**Supplement Fig. 7. Confirmation and characterization of *Naa12* KO mice.** (A) Expression of *Naa10* and *Naa12* in WT, *Naa10* KO and *Naa12* KO tissues, adult mice 13 weeks of age, (brain, heart, kidney and testis) by RT-PCR. Expression of GAPDH was analyzed as an endogenous control. (B) Phenotypes in *Naa12* KO mice. Lack of hypopigmentation (upper; N=29) and lack of supernumerary ribs (middle and bottom; E18.5; N=7) in *Naa12* KO mouse.

1425

1426

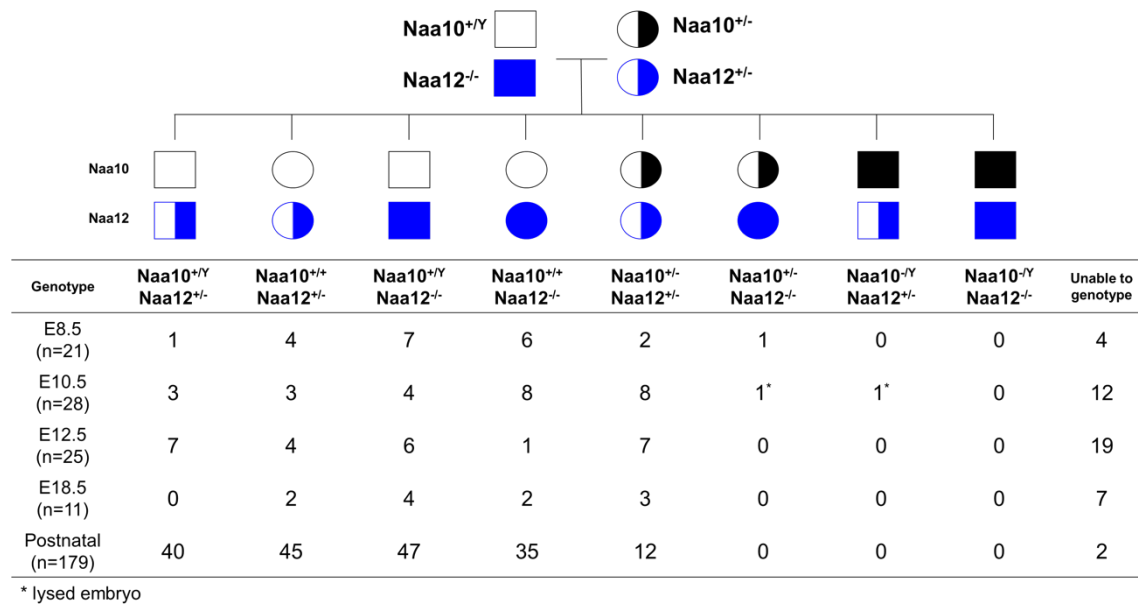

**Supplement Fig. 8. Genotypes of offspring from  $Naa10^{+/-}$   $Naa12^{+/-}$  female mice crossed to the  $Naa10^{+Y}$   $Naa12^{-/-}$  male mice.  $Naa10$   $Naa12$  DKO exhibit embryonic lethality. Pedigree of mating and genotypes of pups and embryos at E8.5, E10.5, E12.5 and E18.5.**

1427



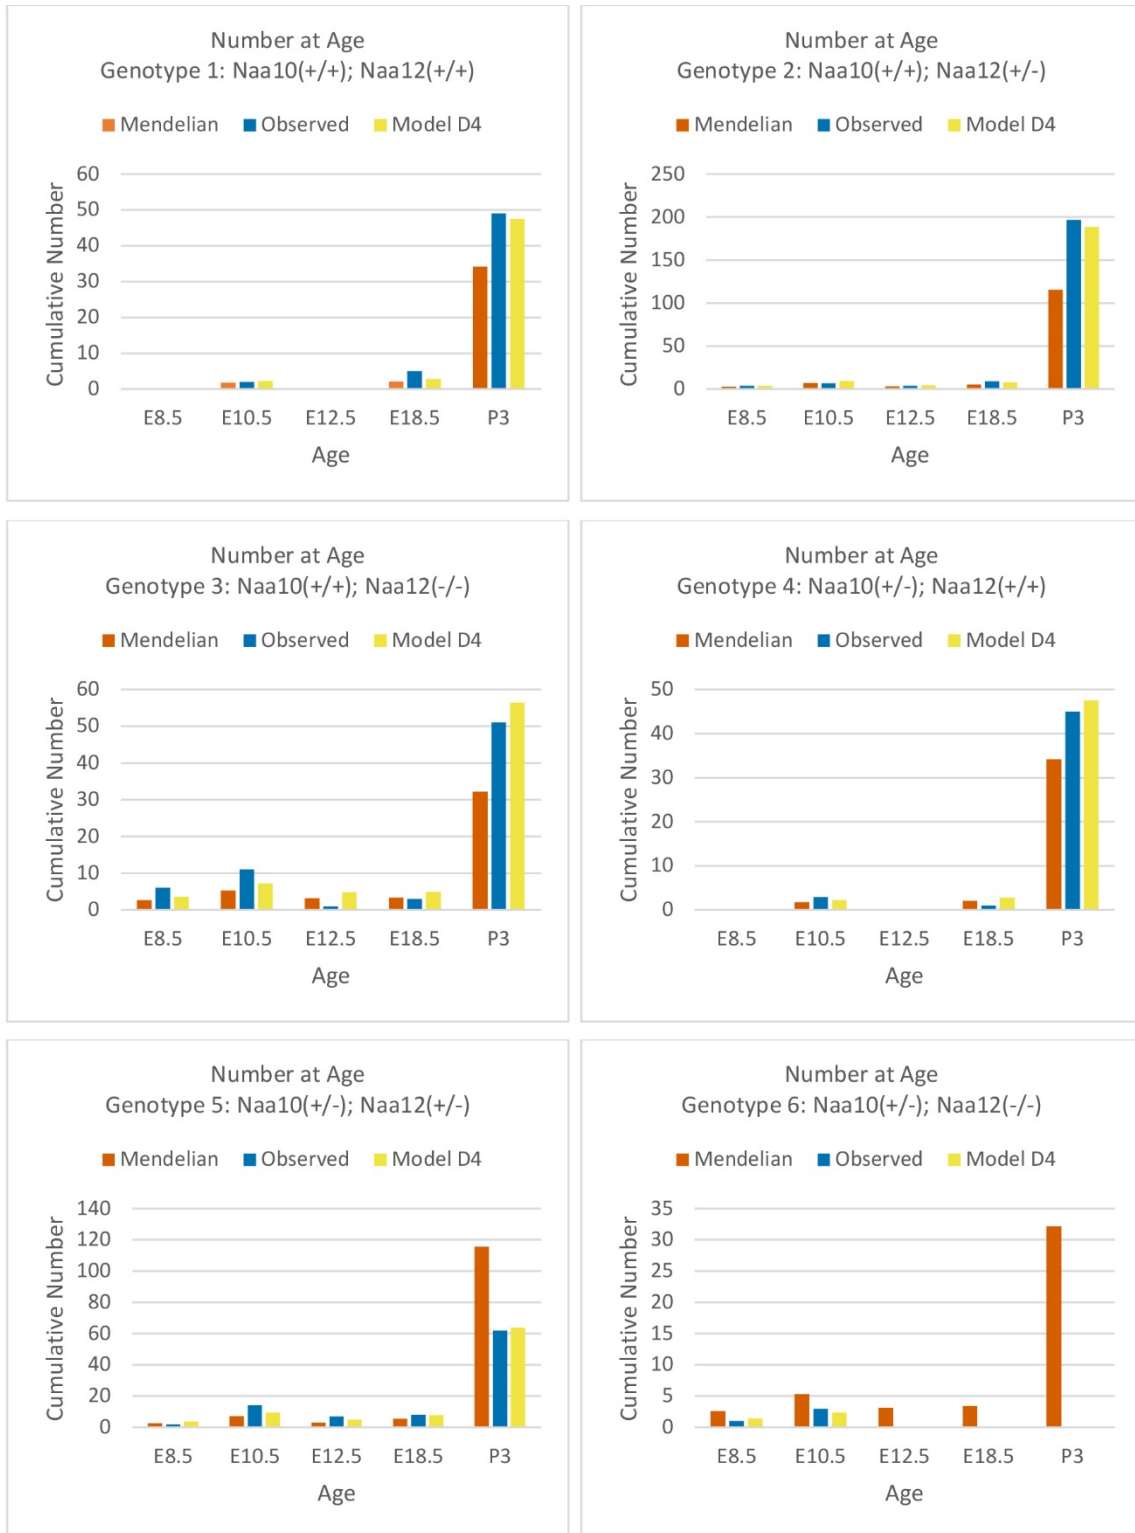

**Supplement Fig. 9. Comparisons of Mendelian predicted, observed and model D<sub>4</sub> predicted offspring numbers for female genotypes (#1 - #6) at each age.**

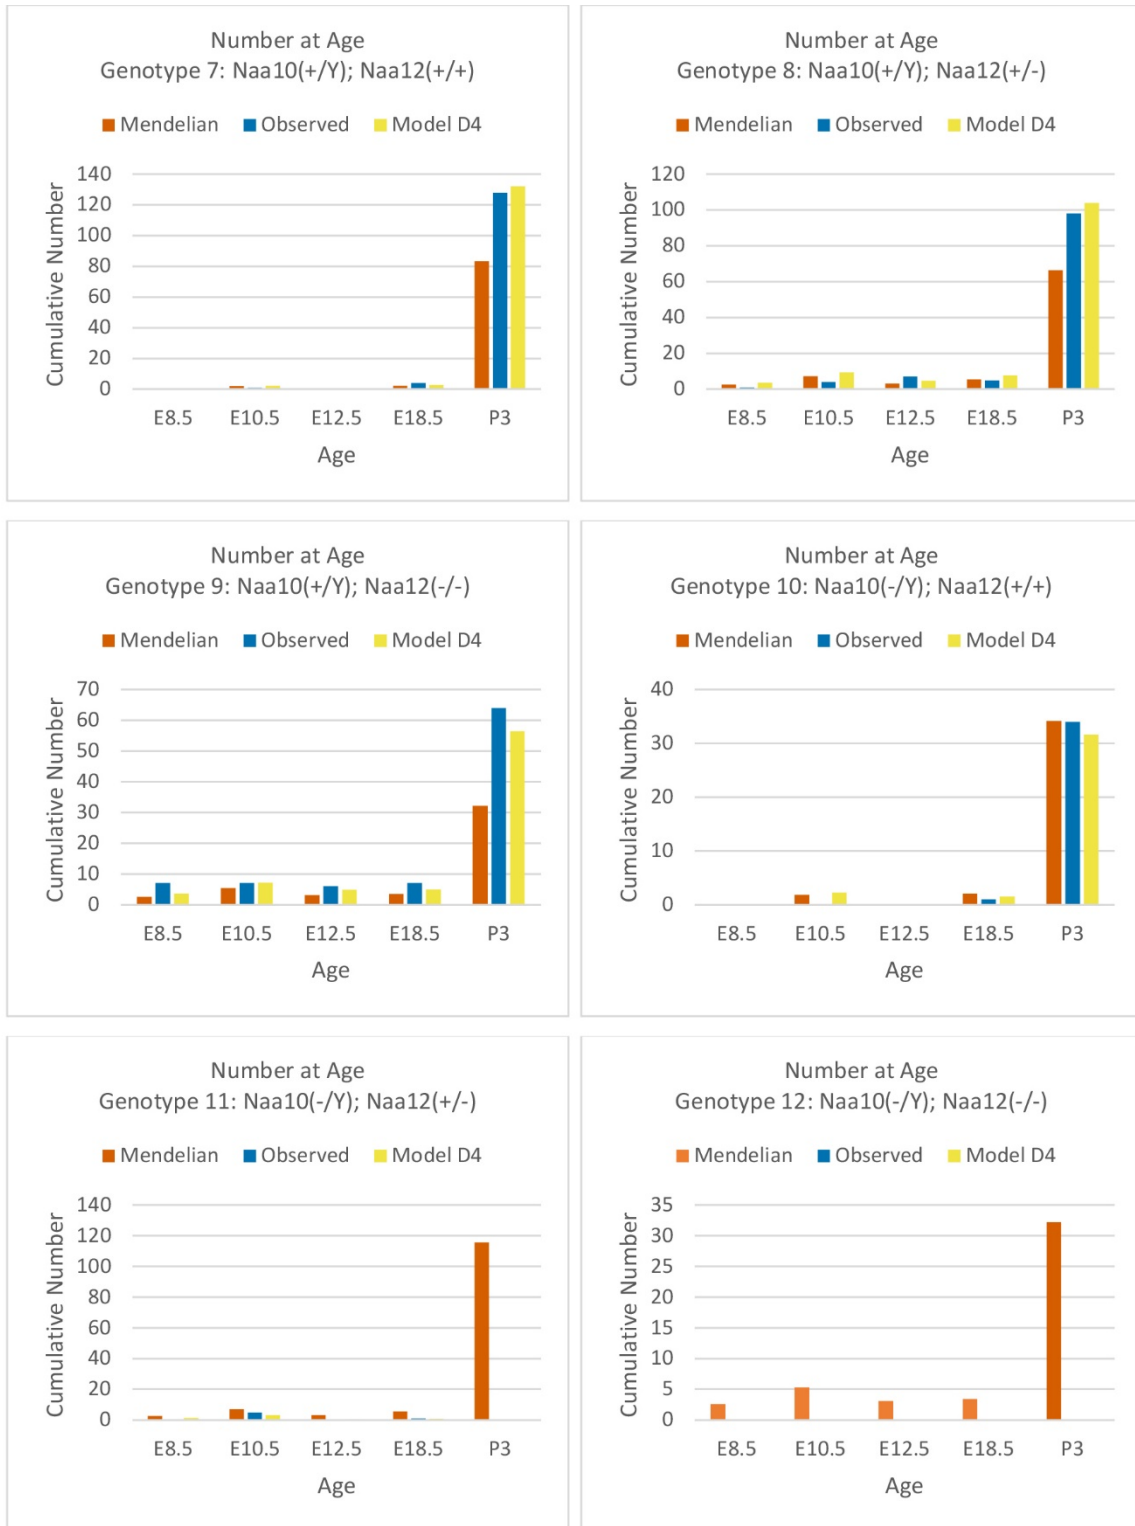

**Supplement Fig. 10. Comparisons of Mendelian predicted, observed and model D<sub>4</sub> predicted offspring numbers for male genotypes (#7 - #12) at each age.**

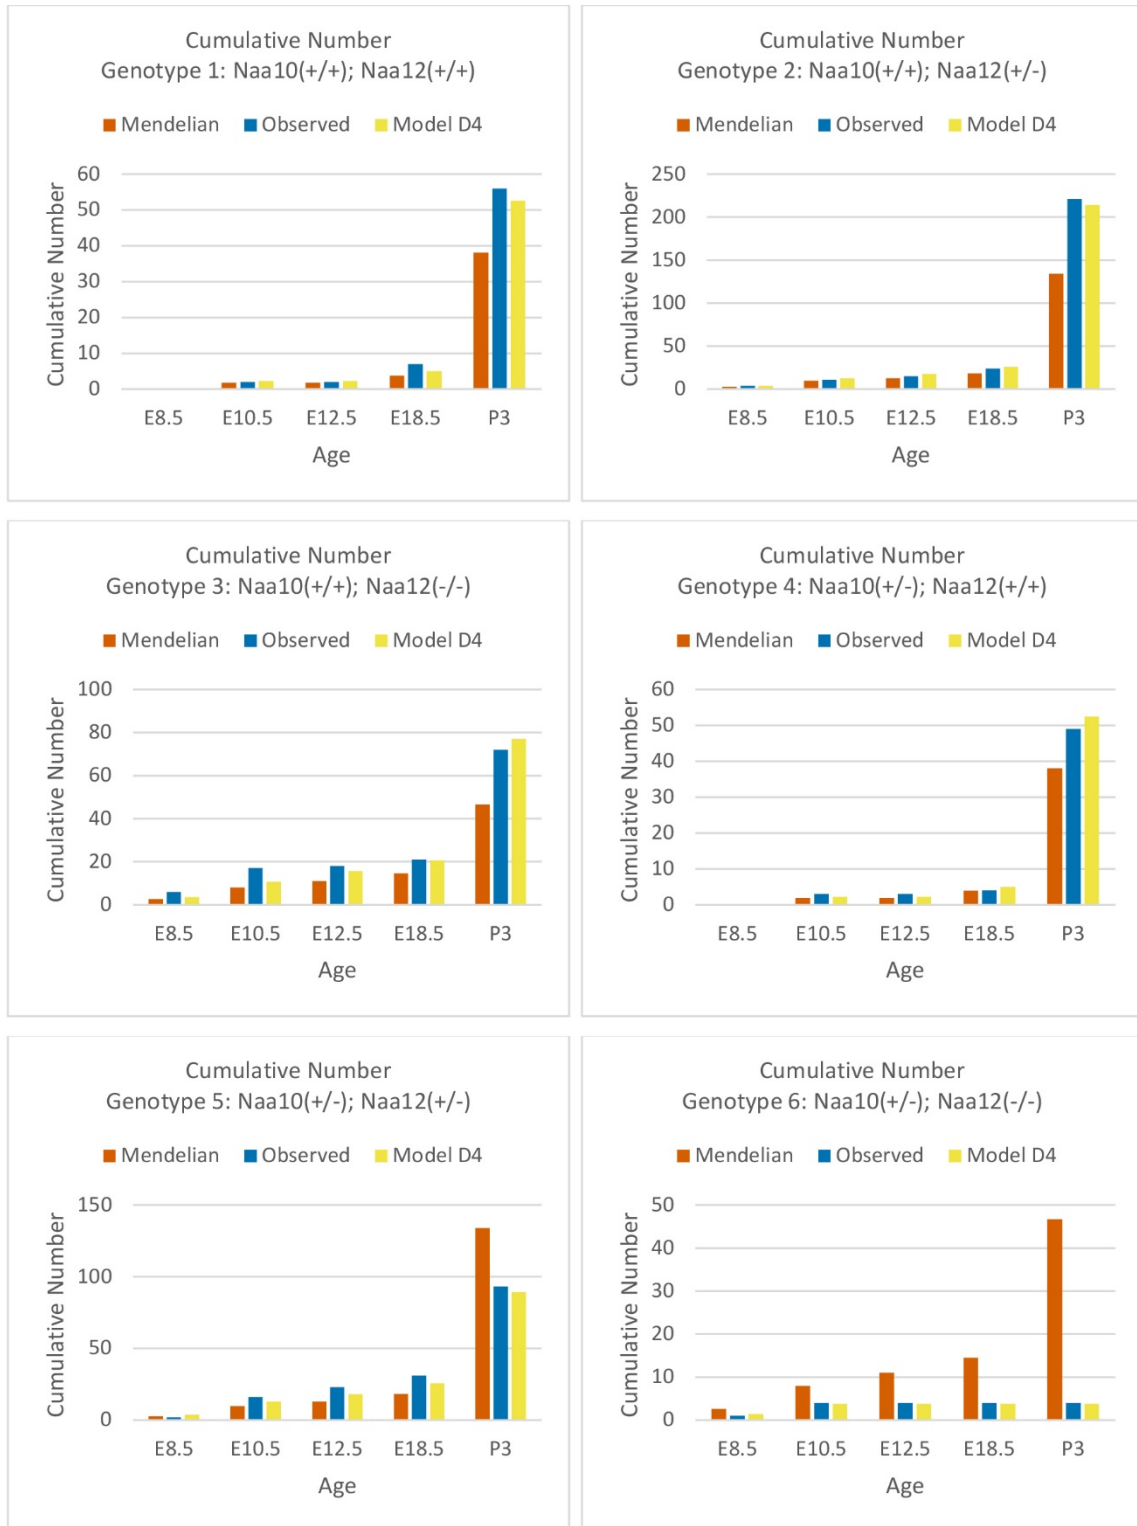

**Supplement Fig. 11. Comparisons of cumulative Mendelian predicted, observed and model D4 predicted offspring numbers for female genotypes (#1 - #6) at each age.**

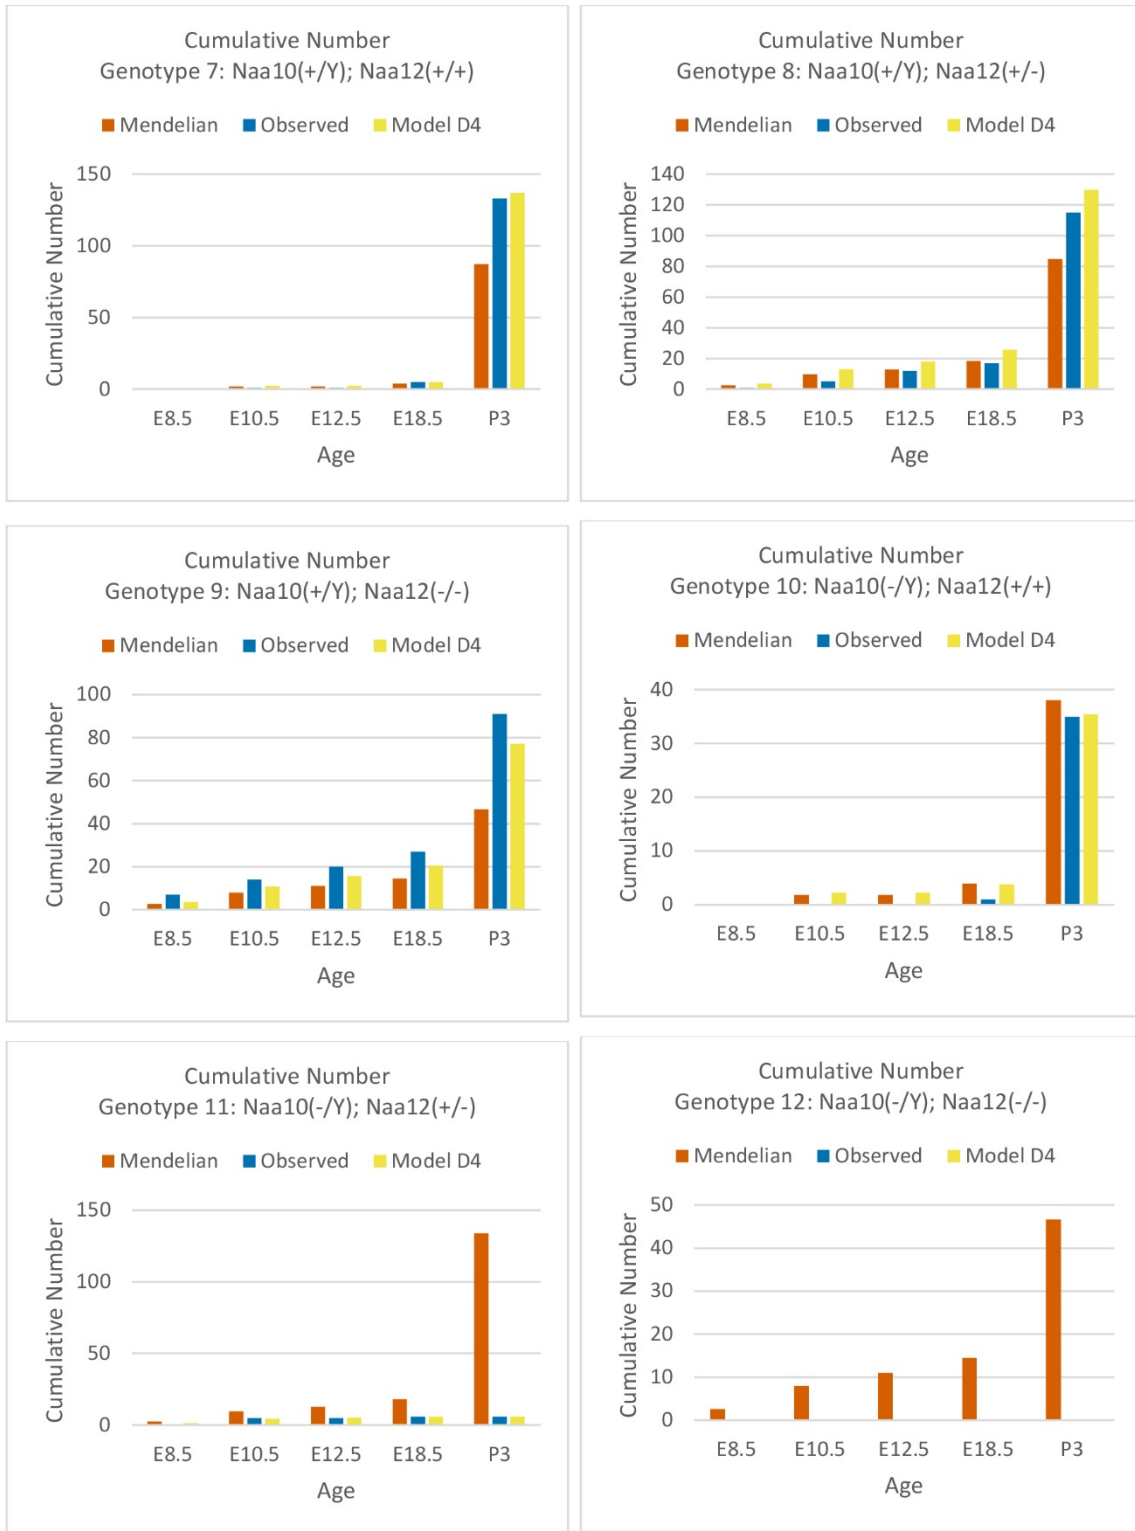

**Supplement Fig. 12. Comparisons of cumulative Mendelian predicted, observed and model D<sub>4</sub> predicted offspring numbers for male genotypes (#7 - #12) at each age.**
